# Supplementary material for: Assessing Arboreal Adaptations of Bird Antecedents: Testing the Ecological Setting of the Origin of the Avian Flight Stroke
Source: PubMed Central journal article supplement (PMC3153453; doi:10.1371/journal.pone.0022292), 2011-08-09

A)

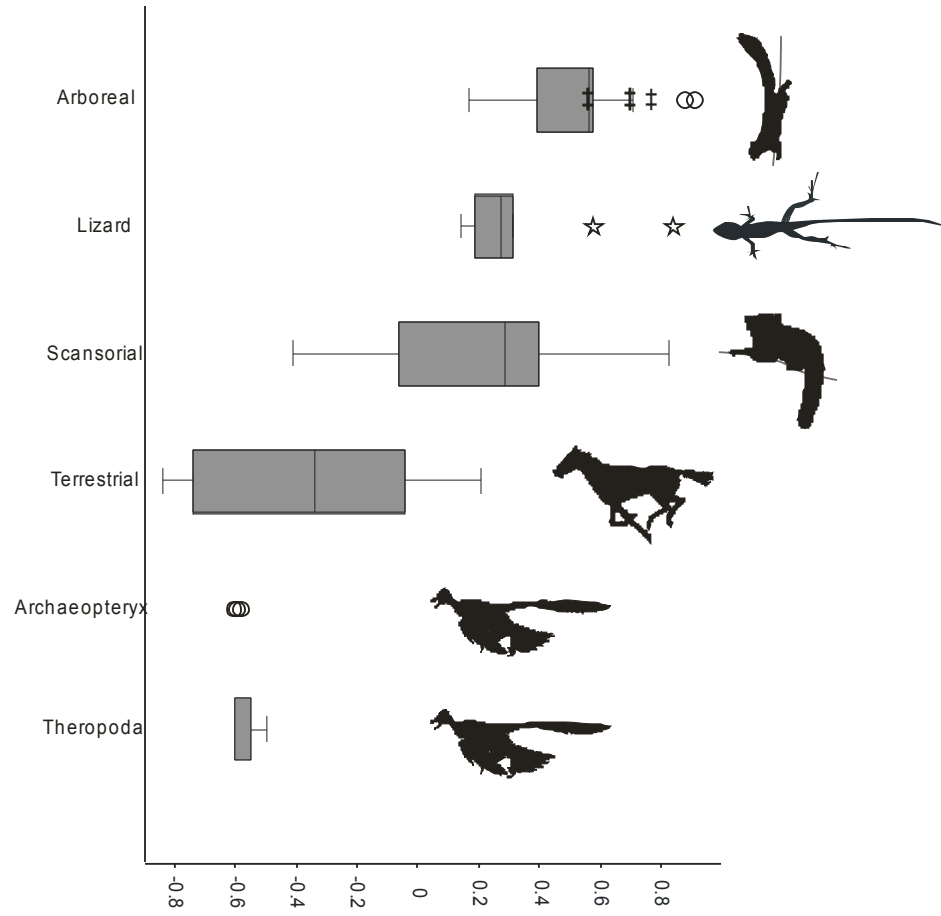

B)

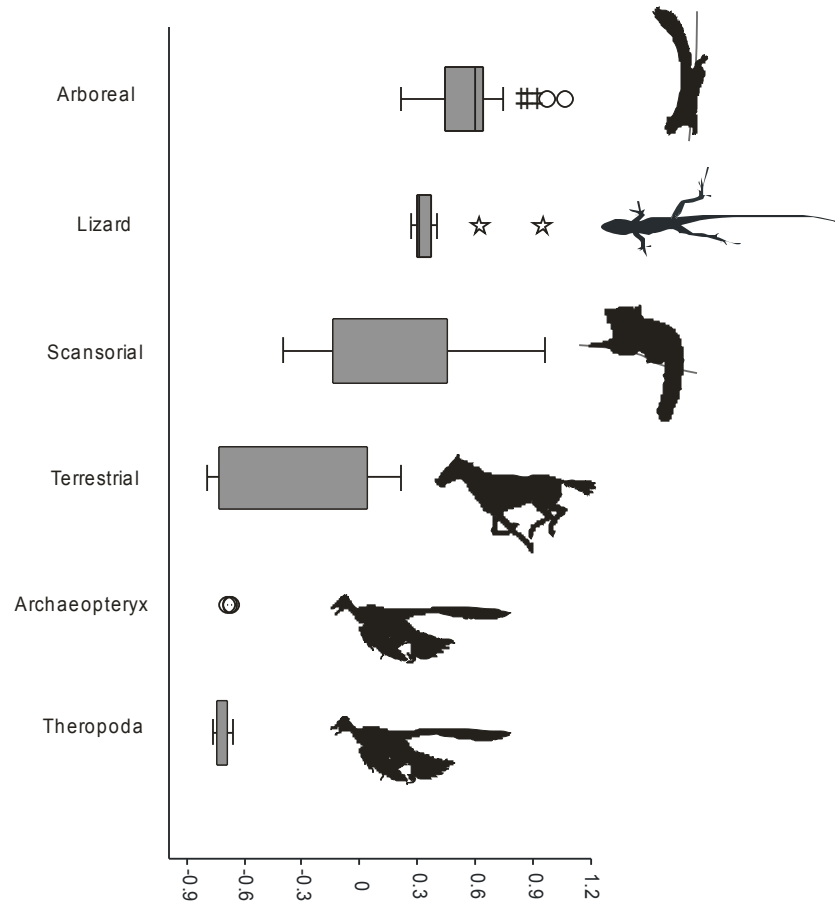

C)

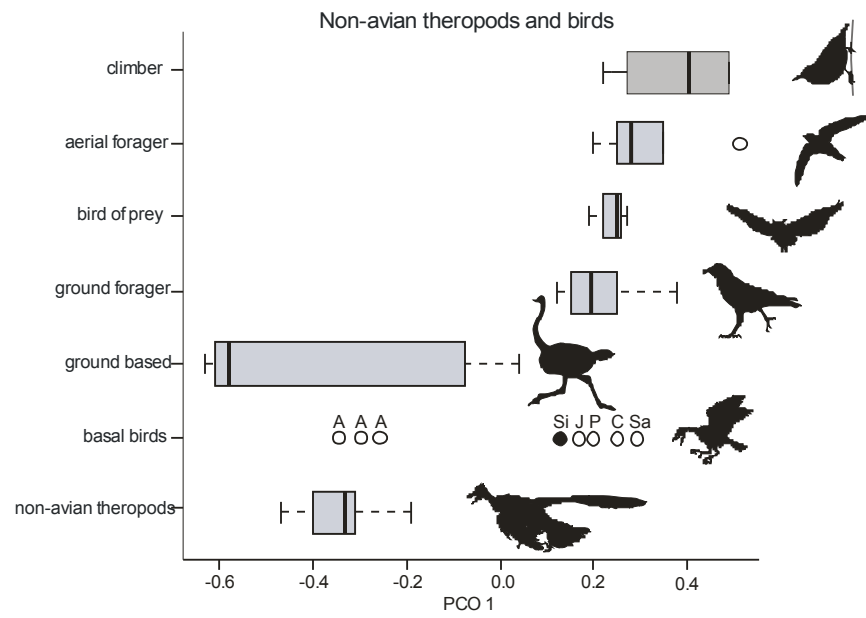

Supplement: pone.0022292.s005.pdf [file pone.0022292.s005.pdf]
