# Supplementary material for: Assessing Arboreal Adaptations of Bird Antecedents: Testing the Ecological Setting of the Origin of the Avian Flight Stroke
Source: PubMed Central journal article supplement (PMC3153453; doi:10.1371/journal.pone.0022292), 2011-08-09
Supplement: pone.0022292.s016.pdf [file pone.0022292.s016.pdf]

| category | taxon                               | Euclidean |          |          | Correlation |          |          |
|----------|-------------------------------------|-----------|----------|----------|-------------|----------|----------|
|          |                                     | axis 1    | axis 2   | axis 3   | axis 1      | axis 2   | axis 3   |
| A        | <i>Aotus trivirgatus</i>            | 2.3294    | -1.2625  | 1.922    | 0.57886     | -0.41539 | 0.32696  |
| A        | <i>Arctictis binturong</i>          | 2.4596    | 0.57812  | -1.3004  | 0.80383     | 0.53612  | -0.09461 |
| A        | <i>Bradypus tridactylus</i>         | 2.0203    | -0.28325 | -1.7099  | 0.40516     | 0.22547  | -0.02093 |
| A        | <i>Callithrix jacchus</i>           | 2.4658    | -1.3621  | -0.0421  | 0.63249     | -0.1907  | -0.23175 |
| A        | <i>Caluromys lanatus</i>            | 2.924     | -2.115   | 0.19749  | 0.96395     | -0.37629 | -0.23613 |
| A        | <i>Cebuella pygmea</i>              | 2.5287    | -1.8346  | -0.71783 | 0.61983     | -0.2137  | -0.27367 |
| A        | <i>Cercopithecus cephus</i>         | 2.2601    | -1.3777  | 1.8395   | 0.55177     | -0.42795 | 0.31798  |
| A        | <i>Chamaeleo calypttratus</i>       | 2.1176    | -2.8174  | 1.8169   | 0.66002     | -0.88486 | -0.05785 |
| A        | <i>Daubentonina madagascarensis</i> | 2.186     | -2.5395  | -0.32231 | 0.59167     | -0.24926 | -0.04673 |
| A        | <i>Dendrolagus insutus</i>          | 1.6972    | 0.42659  | -0.31757 | 0.52967     | 0.25494  | -0.10692 |
| A        | <i>Erthizon dorsatum</i>            | 1.8575    | -0.93637 | -0.1578  | 0.63178     | -0.29107 | -0.41743 |
| A        | <i>Galaucomys sabrinus</i>          | 3.1129    | 0.37787  | -0.39315 | 0.77099     | 0.3878   | 0.16621  |
| A        | <i>Galaucomys volans</i>            | 3.0568    | 0.25418  | -0.46963 | 0.75339     | 0.37168  | 0.16461  |
| A        | <i>Gymnobleidus leadbeateri</i>     | 2.2333    | -2.1307  | 0.038403 | 0.54157     | -0.30228 | -0.15902 |
| A        | <i>Lagothrix sp.</i>                | 2.7328    | -1.4395  | 1.98     | 0.71188     | -0.51985 | 0.42752  |
| A        | <i>Lemur fulvus</i>                 | 2.1834    | -1.5077  | 1.7584   | 0.5116      | -0.43302 | 0.32642  |
| A        | <i>Leontopithecus sp.</i>           | 2.424     | -1.4357  | -0.09327 | 0.62039     | -0.19827 | -0.2348  |
| A        | <i>Loris tardigradius</i>           | 2.3615    | -1.5675  | 1.69     | 0.60476     | -0.45878 | 0.42401  |
| A        | <i>Manis tetradactyla</i>           | 2.4837    | 1.0588   | -0.7237  | 0.70014     | 0.41966  | -0.18354 |
| A        | <i>Otolemur sp.</i>                 | 1.9598    | -1.6099  | 1.4967   | 0.57521     | -0.48691 | 0.42893  |
| A        | <i>Perodicticus potto</i>           | 2.3491    | -1.5778  | 1.6142   | 0.59743     | -0.47999 | 0.37187  |
| A        | <i>Petaurista grandis</i>           | 3.0556    | 0.25718  | -0.49698 | 0.76802     | 0.34828  | 0.13337  |
| A        | <i>Potos flavus</i>                 | 2.9378    | -1.3953  | 1.9426   | 0.89549     | -0.54452 | 0.50984  |
| A        | <i>Saguinus sp.</i>                 | 2.4443    | -1.3914  | -0.06116 | 0.63035     | -0.19821 | -0.24056 |
| A        | <i>Saimiri sciureus</i>             | 2.4174    | -1.4415  | -0.09536 | 0.61864     | -0.19873 | -0.23613 |
| A        | <i>Scurius carolinesis</i>          | 3.0235    | 0.6457   | -0.49206 | 0.77478     | 0.3806   | 0.09356  |
| A        | <i>Tarsius spectrum</i>             | 1.1149    | -2.662   | -0.10006 | 0.31697     | -0.38091 | -0.13047 |
| A-Fossil | <i>Megalancosaurus</i>              | 2.5753    | -3.0112  | 0.12878  | 0.70873     | -0.56086 | -0.18477 |
| A-Fossil | <i>Vallesaurus</i>                  | 2.8774    | -2.0786  | -1.5839  | 0.64945     | -0.16119 | -0.26368 |
| A-Fossil | <i>Sumina</i>                       | 1.7684    | -1.9311  | 0.87226  | 0.64322     | -0.64441 | 0.12978  |
| B-A      | <i>Alcedo atthis</i>                | -2.4966   | -1.6879  | -0.98055 | -0.38891    | -0.22156 | -0.32469 |
| B-A      | <i>Ara severus</i>                  | -2.6105   | -2.8438  | -0.38283 | -0.33948    | -0.43917 | -0.29817 |
| B-A      | <i>Chaetura pelagica</i>            | -2.9013   | -2.6111  | -2.6561  | -0.32131    | -0.19841 | -0.16905 |
| B-A      | <i>Coccyzus erythrophthalmus</i>    | -2.6432   | -2.9099  | -0.50574 | -0.34705    | -0.41427 | -0.25705 |
| B-A      | <i>Opisthocomus hoazin</i>          | -2.4504   | -1.5804  | -0.89356 | -0.40394    | -0.20137 | -0.31234 |
| B-C      | <i>Certhia familiaris</i>           | -2.4781   | -1.6368  | -0.99034 | -0.40411    | -0.18571 | -0.27875 |
| B-C      | <i>Dryocopus pileatus</i>           | -2.6033   | -3.4454  | -0.86321 | -0.38835    | -0.48295 | -0.26971 |
| B-C      | <i>Melanerpes erythrocephalus</i>   | -2.4624   | -3.1309  | -0.41097 | -0.40754    | -0.51241 | -0.33093 |
| B-C      | <i>Sitta europaea</i>               | -2.5106   | -1.7109  | -1.0701  | -0.39686    | -0.19223 | -0.27694 |
| B-G      | <i>Cinclus cinclus</i>              | -2.5735   | -1.1997  | 0.40802  | -0.51553    | -0.37519 | -0.06047 |
| B-G      | <i>Columba livia</i>                | -2.4857   | -1.0118  | 0.61924  | -0.53432    | -0.40476 | -0.10364 |

|      |                                 |          |          |          |  |          |          |          |
|------|---------------------------------|----------|----------|----------|--|----------|----------|----------|
| B-G  | <i>Corvus corax</i>             | -2.4791  | -1.6434  | -0.97001 |  | -0.39987 | -0.19991 | -0.29969 |
| B-G  | <i>Corvus frugilegus</i>        | -2.5916  | -1.2409  | 0.36974  |  | -0.50961 | -0.37837 | -0.06261 |
| B-G  | <i>Crotophaga ani</i>           | -2.6764  | -2.3323  | 1.0261   |  | -0.4424  | -0.59629 | -0.0667  |
| B-G  | <i>Geococcyx sp.</i>            | -2.6612  | -2.2979  | 1.0551   |  | -0.44524 | -0.59436 | -0.06488 |
| B-G  | <i>Goura crisata</i>            | -2.4513  | -0.93253 | 0.67072  |  | -0.54536 | -0.38853 | -0.08907 |
| B-G  | <i>Melanocorypha calandra</i>   | -2.4534  | -0.92966 | 0.64725  |  | -0.54654 | -0.35926 | -0.05609 |
| B-G  | <i>Pica pica</i>                | -2.5791  | -1.2115  | 0.39176  |  | -0.51419 | -0.37225 | -0.05675 |
| B-G  | <i>Sturnus vulgaris</i>         | -2.5718  | -1.1969  | 0.41673  |  | -0.51546 | -0.37958 | -0.06552 |
| B-G  | <i>Turdus philomelos</i>        | -2.6526  | -1.3741  | 0.19499  |  | -0.49244 | -0.36138 | -0.03995 |
| B-GB | <i>Alectornis sp.</i>           | -2.359   | 0.18276  | 0.096851 |  | -0.60091 | -0.0787  | -0.13217 |
| B-GB | <i>Anhima cornuta</i>           | -2.5142  | 0.50377  | 1.3544   |  | -0.6866  | -0.28847 | 0.23831  |
| B-GB | <i>Cariama cristata</i>         | -2.0928  | 1.6985   | -0.15937 |  | -0.63336 | 0.35749  | -0.12719 |
| B-GB | <i>Dromaius novaehollandiae</i> | -2.2302  | 2.0543   | 1.1428   |  | -0.7267  | 0.16465  | 0.27397  |
| B-GB | <i>Gallus gallus</i>            | -2.4759  | 0.58834  | 1.4292   |  | -0.70425 | -0.28623 | 0.24268  |
| B-GB | <i>Meleagris gallopavo</i>      | -2.3515  | 0.20335  | 0.096991 |  | -0.60305 | -0.06143 | -0.11228 |
| B-GB | <i>Rhea sp.</i>                 | -2.2027  | 2.1151   | 1.1816   |  | -0.72886 | 0.17818  | 0.28353  |
| B-GB | <i>Struthio camelus</i>         | -2.2147  | 2.0872   | 1.1672   |  | -0.7329  | 0.16878  | 0.27427  |
| BOP  | <i>Bubo virginianus</i>         | -2.6441  | -2.0142  | -1.474   |  | -0.36887 | -0.20373 | -0.248   |
| BOP  | <i>Buteo jamaicensis</i>        | -2.3064  | -1.2626  | -0.58896 |  | -0.42437 | -0.19153 | -0.34955 |
| BOP  | <i>Falco sparverius</i>         | -2.3371  | -1.3299  | -0.64708 |  | -0.42104 | -0.19361 | -0.34191 |
| BOP  | <i>Strix varia</i>              | -2.7254  | -2.1989  | -1.7999  |  | -0.35443 | -0.19967 | -0.21707 |
| Liz  | <i>Anolis sp.</i>               | 1.675    | -0.1446  | -1.8561  |  | 0.46238  | 0.32074  | 0.071733 |
| Liz  | <i>Crotaphytus collaris</i>     | 2.2848   | 0.95174  | -0.87062 |  | 0.66127  | 0.43797  | -0.09302 |
| Liz  | <i>Draco sp.</i>                | 1.9182   | 0.06     | -1.6658  |  | 0.46006  | 0.27151  | -0.02877 |
| Liz  | <i>Lacerta agilis</i>           | 2.0022   | 0.3354   | -1.4648  |  | 0.49309  | 0.23013  | -0.17558 |
| Liz  | <i>Phrynosoma solare</i>        | 2.2044   | 0.71775  | -1.0466  |  | 0.5982   | 0.39175  | -0.08576 |
| Liz  | <i>Varanus niloticus</i>        | 2.2225   | 0.77106  | -1.0061  |  | 0.64108  | 0.38496  | -0.11061 |
| Liz  | <i>Xuanlong zhaoi</i>           | 1.9821   | 0.14133  | -1.6032  |  | 0.45016  | 0.26648  | -0.04665 |
| Scan | <i>Aliurus filgens</i>          | 2.6998   | 0.1      | -0.16914 |  | 0.6435   | 0.14843  | 0.076766 |
| Scan | <i>Chlorocebus pygerythrus</i>  | 2.2338   | -1.4187  | 1.8382   |  | 0.54013  | -0.43371 | 0.32722  |
| Scan | <i>Didelphis sp.</i>            | 2.4108   | -1.1875  | -0.04787 |  | 0.86152  | -0.29345 | -0.48073 |
| Scan | <i>Felis catus</i>              | 0.16036  | 1.0575   | -0.97777 |  | -0.15032 | 0.49778  | -0.22171 |
| Scan | <i>Genetta genetta</i>          | 0.83726  | 0.86224  | -0.91819 |  | 0.18318  | 0.38311  | -0.18854 |
| Scan | <i>Gulo gulo</i>                | 1.3103   | 0.92071  | -1.5624  |  | 0.44034  | 0.38843  | -0.29684 |
| Scan | <i>Lemur catta</i>              | 1.606    | -1.0841  | 1.9724   |  | 0.4316   | -0.55382 | 0.31902  |
| Scan | <i>Leopardus pardal</i>         | -0.03827 | 0.74178  | -1.8205  |  | -0.1532  | 0.47029  | -0.24069 |
| Scan | <i>Leptailurus serval</i>       | -0.02874 | 0.75526  | -1.8167  |  | -0.15293 | 0.4722   | -0.23912 |
| Scan | <i>Marmosa mexicana</i>         | 1.442    | -1.1635  | -0.10152 |  | 0.43701  | -0.38102 | -0.43655 |
| Scan | <i>Martes americana</i>         | 2.8319   | 1.1932   | -0.83883 |  | 0.73528  | 0.50398  | 0.001666 |
| Scan | <i>Martes pennanti</i>          | 2.7794   | 1.1565   | -0.85745 |  | 0.73035  | 0.48911  | -0.03385 |
| Scan | <i>Monodelphis sp.</i>          | 2.0847   | -1.3174  | 0.43129  |  | 0.64161  | -0.47854 | -0.35993 |
| Scan | <i>Nasua narica</i>             | 2.4412   | 1.4006   | -0.00592 |  | 0.67236  | 0.38482  | 0.22336  |
| Scan | <i>Panthera pardus</i>          | -0.01254 | 0.77499  | -1.7996  |  | -0.16659 | 0.49003  | -0.21697 |

|      |                                  |          |         |          |  |          |          |          |
|------|----------------------------------|----------|---------|----------|--|----------|----------|----------|
| Scan | <i>Papio papio</i>               | 0.92439  | -0.8337 | 1.9485   |  | 0.26079  | -0.69062 | 0.34413  |
| Scan | <i>Procapra capensis</i>         | 0.54337  | 1.7916  | 0.81971  |  | 0.26615  | 0.16858  | 0.4128   |
| Scan | <i>Procyon lotor</i>             | 2.4477   | 1.4059  | 0.019856 |  | 0.64608  | 0.40932  | 0.2608   |
| Scan | <i>Puma concolor</i>             | -0.02896 | 0.75175 | -1.8126  |  | -0.15564 | 0.47471  | -0.24103 |
| Scan | <i>Rhynchocyon brevicaudatus</i> | 1.5361   | -3.1912 | 1.3529   |  | 0.42763  | -0.72843 | 0.012076 |
| Scan | <i>Tamias minus</i>              | 2.5235   | 1.4531  | 0.042856 |  | 0.6481   | 0.43121  | 0.30507  |
| Scan | <i>Tupia ferruginea (gillis)</i> | 0.73518  | 1.4902  | -0.74623 |  | 0.20573  | 0.38069  | -0.32655 |
| Terr | <i>Acinonyx jubatus</i>          | -0.6936  | 1.1195  | -0.86671 |  | -0.36951 | 0.42352  | 0.035536 |
| Terr | <i>Canis familiaris</i>          | -1.5072  | 1.798   | -0.04235 |  | -0.63294 | 0.36682  | -0.14802 |
| Terr | <i>Cavia porcellus</i>           | 0.51549  | 1.7883  | 0.11012  |  | 0.23041  | 0.33741  | 0.05678  |
| Terr | <i>Chinchilla sp.</i>            | 0.000157 | 1.8518  | 0.17897  |  | -0.05118 | 0.29299  | 0.02498  |
| Terr | <i>Dasyprocta sp.</i>            | -1.4643  | 2.144   | 0.75976  |  | -0.6673  | 0.22502  | 0.21573  |
| Terr | <i>Dipodomys ordii</i>           | 0.081164 | 1.7099  | 0.072099 |  | -0.06747 | 0.31041  | -0.01021 |
| Terr | <i>Equus caballus</i>            | -0.92638 | 2.2845  | 0.9351   |  | -0.57642 | 0.23865  | 0.27129  |
| Terr | <i>Erinaceus europaeus</i>       | 0.60463  | 1.6812  | 0.006049 |  | 0.20139  | 0.36369  | 0.002566 |
| Terr | <i>Helogale parvula</i>          | 0.096755 | 1.4492  | -0.0158  |  | -0.10282 | 0.41218  | 0.002835 |
| Terr | <i>Hystrix cristata</i>          | 0.47451  | 0.81426 | 1.3758   |  | 0.20541  | -0.38534 | 0.29298  |
| Terr | <i>Lepus americanus</i>          | -1.4498  | 2.0679  | 0.72565  |  | -0.63358 | 0.21592  | 0.22661  |
| Terr | <i>Lynx lynx</i>                 | -0.08158 | 1.1756  | -1.0482  |  | -0.20669 | 0.52046  | -0.25906 |
| Terr | <i>Macropus sp</i>               | -1.0558  | 1.935   | 0.63341  |  | -0.54628 | 0.27904  | 0.24329  |
| Terr | <i>Marmota flaviventris</i>      | 1.2118   | 1.3011  | -0.0482  |  | 0.44502  | 0.35606  | 0.10829  |
| Terr | <i>Mephitis mephitis</i>         | 0.62429  | 1.664   | -0.00187 |  | 0.23257  | 0.34567  | -0.01386 |
| Terr | <i>Metachirus sp.</i>            | 0.30184  | 0.50685 | 1.8974   |  | 0.10705  | -0.50891 | 0.42882  |
| Terr | <i>Mustela erminea</i>           | 0.73064  | 1.4054  | -0.82981 |  | 0.22701  | 0.33964  | -0.31565 |
| Terr | <i>Octodon degu</i>              | 0.32546  | 1.5431  | 0.067904 |  | 0.05296  | 0.23733  | -0.04654 |
| Terr | <i>Odocoileus sp.</i>            | -0.93753 | 2.2072  | 0.90234  |  | -0.60563 | 0.22035  | 0.26159  |
| Terr | <i>Oryzomys sp.</i>              | -1.477   | 2.098   | 0.73019  |  | -0.65252 | 0.21696  | 0.21179  |
| Terr | <i>Panthera leo</i>              | -0.0281  | 0.75194 | -1.8133  |  | -0.15483 | 0.47401  | -0.24407 |
| Terr | <i>Panthera tigris</i>           | -0.01878 | 0.76576 | -1.8068  |  | -0.1589  | 0.48037  | -0.23424 |
| Terr | <i>Pecari ta jacu</i>            | -0.93296 | 2.2561  | 0.90444  |  | -0.58005 | 0.24465  | 0.26681  |
| Terr | <i>Rattus sp.</i>                | 1.4643   | 1.315   | 0.062325 |  | 0.53536  | 0.39642  | 0.19597  |
| Terr | <i>Spermophilus franklini</i>    | 1.2671   | 1.4109  | 0.023044 |  | 0.47945  | 0.39745  | 0.13105  |
| Terr | <i>Sus sp.</i>                   | -0.90311 | 2.1032  | 0.8414   |  | -0.50207 | 0.19103  | 0.28248  |
| Terr | <i>Tapirus sp.</i>               | -0.91369 | 2.2261  | 0.89785  |  | -0.5114  | 0.23948  | 0.29285  |
| Terr | <i>Taxidea taxus</i>             | 1.2465   | 1.5613  | 0.72921  |  | 0.46489  | 0.27602  | 0.53811  |
| Terr | <i>Urocyon v. everetti</i>       | 0.71822  | 1.3857  | -0.81718 |  | 0.18939  | 0.36185  | -0.29248 |
| BB   | <i>Archaeopteryx</i>             | -1.0707  | 0.77908 | 0.013525 |  | -0.43758 | 0.11094  | 0.091936 |
| BB   | <i>Archaeopteryx</i>             | -1.0471  | 0.80289 | 0.058802 |  | -0.43616 | 0.12088  | 0.10693  |
| BB   | <i>Archaeopteryx</i>             | -1.0373  | 0.86288 | 0.13212  |  | -0.45536 | 0.13791  | 0.11768  |
| BB   | <i>Confuciusornis</i>            | -2.5377  | -1.1264 | 0.51507  |  | -0.52075 | -0.40289 | -0.09566 |
| BB   | <i>Jeholornis</i>                | -2.4947  | -1.0165 | 0.55283  |  | -0.53666 | -0.34382 | -0.03461 |
| BB   | <i>Pengornis</i>                 | -2.4499  | -1.5813 | -0.88123 |  | -0.40134 | -0.20888 | -0.32359 |
| BB   | <i>Sapeornis</i>                 | -2.3595  | -1.3669 | -0.72968 |  | -0.42642 | -0.15987 | -0.28016 |

|      |                              |          |         |          |  |          |          |          |
|------|------------------------------|----------|---------|----------|--|----------|----------|----------|
| BB   | <i>Sinornis</i>              | -2.5489  | -1.1495 | 0.48323  |  | -0.51948 | -0.39474 | -0.08495 |
| Ther | <i>Allosaurus</i>            | -1.0349  | 0.8183  | 0.049029 |  | -0.37717 | 0.061911 | 0.054699 |
| Ther | <i>Anchiornis</i>            | -1.0485  | 0.80719 | 0.081756 |  | -0.43553 | 0.12832  | 0.12396  |
| Ther | <i>Bambiraptor</i>           | -0.97202 | 1.0098  | 0.2601   |  | -0.45526 | 0.1424   | 0.11469  |
| Ther | <i>Caudipteryx</i>           | -0.93858 | 1.2508  | 0.95466  |  | -0.43071 | -0.0157  | 0.37636  |
| Ther | <i>Caudipteryx</i>           | -0.96924 | 1.2152  | 0.93489  |  | -0.44103 | -0.01432 | 0.37657  |
| Ther | <i>Compsognathus</i>         | -1.1314  | 1.1873  | -0.31904 |  | -0.39438 | 0.25343  | -0.01776 |
| Ther | <i>Compsognathus</i>         | -1.1387  | 1.1562  | -0.33516 |  | -0.38973 | 0.24613  | -0.01962 |
| Ther | <i>Dalianraptor</i>          | -1.0297  | 0.7519  | -0.01949 |  | -0.39731 | 0.1067   | 0.10416  |
| Ther | <i>Epidendrosaurus</i>       | -1.0678  | 0.72498 | -0.03994 |  | -0.41055 | 0.091866 | 0.083726 |
| Ther | <i>Mei long</i>              | -1.2433  | 0.95717 | -0.24948 |  | -0.48884 | 0.14863  | 0.10501  |
| Ther | <i>Microraptor gui</i>       | -1.0893  | 0.89797 | 0.20133  |  | -0.47756 | 0.12212  | 0.097557 |
| Ther | <i>Microraptor zhaoianus</i> | -1.1611  | 0.87452 | 0.047291 |  | -0.4961  | 0.1241   | 0.095057 |
| Ther | <i>Sinornithoides</i>        | -0.93473 | 1.2844  | 0.98987  |  | -0.44543 | -0.00429 | 0.38826  |
| Ther | <i>Sinornithomimus</i>       | -1.2334  | 1.3199  | 0.94617  |  | -0.51228 | -0.06699 | 0.33962  |
| Ther | <i>Sinosauropteryx</i>       | -1.1523  | 1.2245  | -0.27884 |  | -0.40608 | 0.25563  | -0.03761 |
| Ther | <i>Sinosauropteryx</i>       | -1.1291  | 1.2841  | -0.22535 |  | -0.41242 | 0.26443  | -0.04155 |
| Ther | <i>Struthiomimus</i>         | -1.1947  | 1.421   | 1.03     |  | -0.53391 | -0.05639 | 0.35251  |
| Ther | <i>Tyrannosaurus</i>         | -1.1587  | 1.2133  | -0.26892 |  | -0.3904  | 0.23153  | -0.05488 |
