# Supplementary material for: Assessing Arboreal Adaptations of Bird Antecedents: Testing the Ecological Setting of the Origin of the Avian Flight Stroke
Source: PubMed Central journal article supplement (PMC3153453; doi:10.1371/journal.pone.0022292), 2011-08-09
Supplement: pone.0022292.s019.pdf [file pone.0022292.s019.pdf]

| category | taxon                               | Euclidean |          |          |          | Correlation |          |          |
|----------|-------------------------------------|-----------|----------|----------|----------|-------------|----------|----------|
|          |                                     | axis 1    | axis 2   | axis 3   | axis 4   | axis 1      | axis 2   | axis 3   |
| A        | <i>Aotus trivirgatus</i>            | 1.6172    | 1.5545   | 0.48415  | -0.89753 | 0.57676     | 0.44822  | -0.2775  |
| A        | <i>Arctictis binturong</i>          | 1.1948    | -1.3044  | 0.12755  | 0.85185  | 0.49083     | -0.50326 | 0.094656 |
| A        | <i>Bradypus tridactylus</i>         | 0.97267   | -1.3107  | -0.14754 | -0.10152 | 0.22213     | -0.22441 | 0.053158 |
| A        | <i>Callithrix jacchus</i>           | 2.0106    | 0.04     | -0.17403 | -0.53445 | 0.59325     | -0.0688  | -0.07578 |
| A        | <i>Caluromys lanatus</i>            | 2.5693    | 0.16995  | -1.1515  | 0.87151  | 1.0544      | -0.15275 | 0.094362 |
| A        | <i>Cebuella pygmea</i>              | 2.2322    | -0.09845 | -0.42287 | -0.64352 | 0.58551     | -0.06009 | -0.04435 |
| A        | <i>Cercopithecus cephus</i>         | 1.6321    | 1.5543   | 0.37598  | -0.9143  | 0.55522     | 0.45614  | -0.24262 |
| A        | <i>Chamaeleo calypttratus</i>       | 2.3445    | 1.596    | -0.85032 | 1.3067   | 0.94377     | 0.49979  | 0.38138  |
| A        | <i>Daubentonina madagascarensis</i> | 2.2134    | -0.04679 | -0.50612 | -0.56041 | 0.69125     | -0.09103 | -0.0498  |
| A        | <i>Dendrolagus insutus</i>          | 0.37088   | -0.8261  | 0.22345  | 0.93512  | 0.20247     | -0.45837 | 0.18596  |
| A        | <i>Erthizon dorsatum</i>            | 1.7589    | 0.01     | -0.20361 | 0.071854 | 0.66946     | -0.10534 | 0.13215  |
| A        | <i>Galaucomyus sabrinus</i>         | 1.2951    | -1.2435  | 0.61476  | -0.46261 | 0.40032     | -0.34159 | -0.2542  |
| A        | <i>Galaucomyus volans</i>           | 1.3098    | -1.2367  | 0.55346  | -0.46872 | 0.40126     | -0.33927 | -0.24176 |
| A        | <i>Gymnobleidus leadbeateri</i>     | 2.0539    | 0.02     | -0.53642 | -0.60434 | 0.52379     | -0.02186 | -0.00174 |
| A        | <i>Lagothrix sp.</i>                | 1.9784    | 1.8053   | -0.30851 | 0.47146  | 0.73201     | 0.62127  | -0.05761 |
| A        | <i>Lemur fulvulus</i>               | 1.6376    | 1.5709   | 0.22269  | -0.97335 | 0.50735     | 0.48     | -0.19293 |
| A        | <i>Leontopithecus sp.</i>           | 2.0212    | 0.04     | -0.23008 | -0.53914 | 0.58798     | -0.0648  | -0.06278 |
| A        | <i>Loris tardigradius</i>           | 1.8057    | 1.4696   | 0.16942  | -0.93158 | 0.63121     | 0.52345  | -0.2637  |
| A        | <i>Manis tetradactyla</i>           | 1.0872    | -0.86615 | 0.043711 | 1.495    | 0.43553     | -0.40274 | 0.17507  |
| A        | <i>Otlemur sp.</i>                  | 1.4745    | 1.5556   | 0.32917  | -0.43632 | 0.64564     | 0.60202  | -0.08973 |
| A        | <i>Perodicticus potto</i>           | 1.8225    | 1.4364   | 0.10355  | -0.92869 | 0.62445     | 0.51574  | -0.24349 |
| A        | <i>Petaurista grandis</i>           | 1.3232    | -1.2553  | 0.57025  | -0.44236 | 0.42644     | -0.35635 | -0.24428 |
| A        | <i>Potos flavus</i>                 | 2.151     | 1.6913   | -0.29755 | 0.54584  | 0.9542      | 0.66257  | -0.14183 |
| A        | <i>Saguinus sp.</i>                 | 2.0176    | 0.04     | -0.19465 | -0.53414 | 0.59606     | -0.07015 | -0.0715  |
| A        | <i>Saimiri sciureus</i>             | 2.0227    | 0.04     | -0.23683 | -0.539   | 0.58729     | -0.0644  | -0.06127 |
| A        | <i>Scurius carolinesis</i>          | 1.3158    | -1.2649  | 0.60526  | -0.43116 | 0.42465     | -0.35627 | -0.24959 |
| A        | <i>Tarsius spectrum</i>             | 1.4159    | 0.22422  | -1.596   | 0.15861  | 0.32619     | 0.094351 | 0.38544  |
| A-Fossil | <i>Megalancosaurus</i>              | 2.6422    | 0.06     | -1.6414  | 0.73264  | 0.85548     | -0.03567 | 0.21597  |
| A-Fossil | <i>Vallesaurus</i>                  | 2.8243    | -0.05565 | -2.0774  | 0.59732  | 0.82682     | 0.037583 | 0.30645  |
| A-Fossil | <i>Sumina</i>                       | 1.7498    | 1.0329   | -0.58374 | 0.12021  | 0.91175     | 0.35604  | 0.006613 |
| Liz      | <i>Anolis sp.</i>                   | 0.93171   | -1.2127  | 0.30397  | 0.055966 | 0.28507     | -0.30825 | 0.013859 |
| Liz      | <i>Crotaphytus collaris</i>         | 0.88083   | -1.1852  | 0.67493  | 0.11648  | 0.35211     | -0.38986 | -0.0462  |
| Liz      | <i>Draco sp.</i>                    | 0.97124   | -1.25    | 0.16934  | 0.032977 | 0.29876     | -0.30054 | 0.029782 |
| Liz      | <i>Lacerta agilis</i>               | 0.98949   | -1.2938  | 0.10083  | 0.031472 | 0.29695     | -0.2876  | 0.03436  |
| Liz      | <i>Phrynosoma solare</i>            | 0.91234   | -1.2004  | 0.51962  | 0.11542  | 0.3324      | -0.35967 | -0.0145  |
| Liz      | <i>Varanus niloticus</i>            | 0.9228    | -1.2151  | 0.62845  | 0.15955  | 0.39153     | -0.40677 | -0.03192 |
| Liz      | <i>Xuanlong zhaoi</i>               | 0.96032   | -1.2417  | 0.059829 | -0.03045 | 0.25687     | -0.2668  | 0.039188 |
| Scan     | <i>Aliurus filgens</i>              | 1.183     | -1.1817  | 0.55166  | -0.46483 | 0.35417     | -0.27581 | -0.16752 |
| Scan     | <i>Chlorocebus pygerythrus</i>      | 1.6319    | 1.5676   | 0.33915  | -0.93568 | 0.54271     | 0.46541  | -0.23003 |

|      |                                  |          |          |          |          |          |          |          |
|------|----------------------------------|----------|----------|----------|----------|----------|----------|----------|
| Scan | <i>Didelphis sp.</i>             | 2.1013   | 0.25997  | -0.90923 | 1.4492   | 0.94766  | -0.10339 | 0.42637  |
| Scan | <i>Felis catus</i>               | -0.80011 | -0.99592 | -0.61501 | -0.49532 | -0.40354 | -0.37687 | -0.16295 |
| Scan | <i>Genetta genetta</i>           | -0.30307 | -0.99366 | 0.049787 | -0.10511 | -0.15165 | -0.43082 | -0.06967 |
| Scan | <i>Gulo gulo</i>                 | 0.2445   | -1.1763  | 0.51245  | 0.28909  | 0.17246  | -0.40552 | 0.046404 |
| Scan | <i>Lemur catta</i>               | 1.1725   | 1.6608   | 0.48043  | -0.38974 | 0.47977  | 0.54865  | -0.01161 |
| Scan | <i>Leopardus pardal</i>          | -0.83709 | -1.212   | -0.85259 | -0.51214 | -0.39387 | -0.38342 | -0.14368 |
| Scan | <i>Leptailurus serval</i>        | -0.84262 | -1.2088  | -0.85789 | -0.51825 | -0.39988 | -0.37863 | -0.14515 |
| Scan | <i>Marmosa mexicana</i>          | 1.4277   | 0.48963  | -1.0952  | 1.5652   | 0.52062  | 0.067238 | 0.57925  |
| Scan | <i>Martes americana</i>          | 1.3136   | -1.2768  | 0.65428  | -0.41544 | 0.43783  | -0.367   | -0.25986 |
| Scan | <i>Martes pennanti</i>           | 1.3244   | -1.2737  | 0.61072  | -0.4175  | 0.4382   | -0.36505 | -0.25076 |
| Scan | <i>Monodelphis sp.</i>           | 1.9394   | 0.33843  | -0.8354  | 1.4297   | 0.71307  | -0.03302 | 0.35107  |
| Scan | <i>Nasua narica</i>              | 0.96569  | -0.42263 | 0.97389  | -0.64917 | 0.39327  | -0.09674 | -0.33608 |
| Scan | <i>Panthera pardus</i>           | -0.85633 | -1.1996  | -0.87272 | -0.53534 | -0.41431 | -0.3659  | -0.14967 |
| Scan | <i>Papio papio</i>               | 0.64856  | 1.7986   | 0.42059  | -0.2006  | 0.37319  | 0.73218  | 0.071994 |
| Scan | <i>Procyon capensis</i>          | -0.63451 | 0.63298  | 1.3841   | 0.47735  | 0.013283 | 0.29226  | 0.038099 |
| Scan | <i>Procyon lotor</i>             | 0.94939  | -0.40202 | 0.94561  | -0.68062 | 0.35704  | -0.07441 | -0.32733 |
| Scan | <i>Puma concolor</i>             | -0.84315 | -1.2018  | -0.86629 | -0.52704 | -0.40403 | -0.37851 | -0.14775 |
| Scan | <i>Rhampoleon brevicaudatus</i>  | 2.0118   | 1.3514   | -0.57535 | -0.2085  | 0.60327  | 0.4239   | 0.21651  |
| Scan | <i>Tamias minus</i>              | 0.9332   | -0.40106 | 0.98359  | -0.68508 | 0.34557  | -0.06959 | -0.33537 |
| Scan | <i>Tupia ferruginea (gillis)</i> | -0.26239 | -0.85904 | 0.73128  | 0.80157  | 0.006333 | -0.36505 | 0.27309  |
| Terr | <i>Acinonyx jubatus</i>          | -1.6586  | -0.21181 | -0.58078 | -0.53474 | -0.6607  | -0.1031  | -0.35666 |
| Terr | <i>Canis familiaris</i>          | -1.9633  | -0.00318 | -0.27564 | 0.06514  | -0.76735 | -0.11739 | 0.10564  |
| Terr | <i>Cavia porcellus</i>           | -0.45403 | -0.12834 | 1.1049   | 0.64647  | 0.021588 | -0.14949 | 0.15605  |
| Terr | <i>Chinchilla sp.</i>            | -1.0083  | 0.07     | 0.9318   | 0.76855  | -0.26663 | -0.07257 | 0.25649  |
| Terr | <i>Dasyprocta sp.</i>            | -2.1723  | 0.75537  | 0.064563 | -0.11004 | -0.80411 | 0.33581  | -0.09675 |
| Terr | <i>Dipodomys ordii</i>           | -1.0091  | 0.09     | 0.8666   | 0.73831  | -0.273   | -0.0363  | 0.25346  |
| Terr | <i>Equus caballus</i>            | -1.675   | 0.74539  | 0.82024  | 0.29022  | -0.75286 | 0.34034  | -0.08432 |
| Terr | <i>Erinaceus europaeus</i>       | -0.45961 | -0.11457 | 1.036    | 0.62676  | -0.01712 | -0.10512 | 0.15322  |
| Terr | <i>Helogale parvula</i>          | -1.0302  | -0.09504 | 0.33959  | -0.09507 | -0.4455  | -0.21525 | -0.31509 |
| Terr | <i>Hystirix cristata</i>         | -0.21593 | 1.233    | 1.005    | 0.44065  | 0.20135  | 0.61965  | 0.2763   |
| Terr | <i>Lepus americanus</i>          | -2.1687  | 0.76682  | 0.019787 | -0.12477 | -0.80249 | 0.34311  | -0.09028 |
| Terr | <i>Lynx lynx</i>                 | -0.79345 | -0.98489 | -0.65709 | -0.50698 | -0.40706 | -0.37326 | -0.16096 |
| Terr | <i>Macropos sp</i>               | -2.187   | 0.78446  | 0.0067   | -0.15148 | -0.79725 | 0.3471   | -0.09448 |
| Terr | <i>Marmot monax</i>              | 0.00604  | -0.20536 | 0.9074   | 0.077941 | 0.16136  | -0.12559 | -0.11758 |
| Terr | <i>Mephitus mephistus</i>        | -0.45028 | -0.1173  | 1.0595   | 0.63466  | 0.008454 | -0.13273 | 0.16194  |
| Terr | <i>Metachirus sp.</i>            | -0.23391 | 1.2578   | 0.97452  | 0.40335  | 0.14219  | 0.62782  | 0.26353  |
| Terr | <i>Mustela erminea</i>           | -0.24518 | -0.8816  | 0.72148  | 0.83549  | 0.024126 | -0.37535 | 0.28549  |
| Terr | <i>Octodon degu</i>              | -0.9761  | 0.04     | 0.95238  | 0.81895  | -0.23978 | -0.14838 | 0.30275  |
| Terr | <i>Odocoileus sp.</i>            | -1.6605  | 0.76106  | 0.7709   | 0.28247  | -0.76253 | 0.35917  | -0.07053 |
| Terr | <i>Oryctocagus sp.</i>           | -2.1661  | 0.75827  | 0.034035 | -0.11308 | -0.80081 | 0.33876  | -0.08959 |
| Terr | <i>Panthera leo</i>              | -0.84238 | -1.2038  | -0.86369 | -0.52425 | -0.40239 | -0.37916 | -0.14696 |
| Terr | <i>Panthera tigris</i>           | -0.84971 | -1.2017  | -0.86834 | -0.52995 | -0.40887 | -0.37239 | -0.14834 |

|      |                               |          |          |          |          |          |          |          |
|------|-------------------------------|----------|----------|----------|----------|----------|----------|----------|
| Terr | <i>Pecari ta jacu</i>         | -1.6697  | 0.74157  | 0.80885  | 0.30002  | -0.74077 | 0.33529  | -0.07196 |
| Terr | <i>Rattus sp.</i>             | -0.02892 | -0.22093 | 1.0836   | 0.085472 | 0.1877   | -0.15972 | -0.17262 |
| Terr | <i>Spermophilus franklini</i> | -0.00764 | -0.21174 | 0.99254  | 0.088021 | 0.17901  | -0.14517 | -0.13986 |
| Terr | <i>Sus sp.</i>                | -1.6623  | 0.77104  | 0.70487  | 0.27006  | -0.72058 | 0.36033  | -0.04363 |
| Terr | <i>Tapirus sp.</i>            | -1.6834  | 0.75764  | 0.74788  | 0.27741  | -0.68946 | 0.34     | -0.049   |
| Terr | <i>Taxidea taxus</i>          | -0.174   | 0.54997  | 1.263    | -0.08205 | 0.20255  | 0.23729  | -0.32933 |
| Terr | <i>Urogale everetti</i>       | -0.25114 | -0.85893 | 0.67148  | 0.80379  | 0.001393 | -0.3512  | 0.28086  |
| BB   | <i>Archaeopteryx</i>          | -1.9403  | 0        | -0.78647 | -0.07551 | -0.67655 | 0.000285 | 0.13201  |
| BB   | <i>Archaeopteryx</i>          | -1.9549  | 0.02     | -0.74655 | -0.07763 | -0.68889 | 0.001728 | 0.11864  |
| BB   | <i>Archaeopteryx</i>          | -1.9702  | 0.04     | -0.70179 | -0.0749  | -0.69709 | 0.002438 | 0.1058   |
| Ther | <i>Allosaurus</i>             | -1.9138  | 0.00568  | -0.5851  | 0.009638 | -0.71094 | -0.05654 | 0.14776  |
| Ther | <i>Anchiornis</i>             | -1.9763  | 0.05     | -0.7778  | -0.11459 | -0.68585 | 0.026361 | 0.10268  |
| Ther | <i>Bambiraptor</i>            | -1.9854  | 0.06     | -0.54101 | -0.04469 | -0.73062 | -0.01964 | 0.086917 |
| Ther | <i>Caudipteryx</i>            | -2.1606  | 0.7969   | -0.21682 | -0.2002  | -0.75808 | 0.36419  | -0.04827 |
| Ther | <i>Caudipteryx</i>            | -2.1621  | 0.80573  | -0.28372 | -0.22899 | -0.7444  | 0.37023  | -0.03861 |
| Ther | <i>Compsognathus</i>          | -1.9443  | 0        | -0.6194  | -0.00852 | -0.70005 | -0.03831 | 0.1283   |
| Ther | <i>Compsognathus</i>          | -1.9361  | -0.00021 | -0.61608 | -0.00396 | -0.70247 | -0.0436  | 0.13396  |
| Ther | <i>Dalianraptor</i>           | -1.9442  | 0        | -0.74473 | -0.06    | -0.68248 | -0.00754 | 0.12889  |
| Ther | <i>Epidendrosaurus</i>        | -1.9228  | -0.01087 | -0.77319 | -0.05569 | -0.67434 | -0.01139 | 0.14522  |
| Ther | <i>Mei long</i>               | -2.1909  | -0.03336 | -0.6185  | -0.05266 | -0.77466 | -0.03492 | 0.03443  |
| Ther | <i>Microraptor gui</i>        | -1.9688  | 0.0693   | -0.65185 | -0.07894 | -0.71591 | 0.002267 | 0.10002  |
| Ther | <i>Microraptor zhaoianus</i>  | -1.9705  | 0.07     | -0.66239 | -0.08705 | -0.71406 | 0.0083   | 0.098667 |
| Ther | <i>Sinornithoides</i>         | -2.1754  | 0.81104  | -0.2346  | -0.22124 | -0.75086 | 0.36564  | -0.04991 |
| Ther | <i>Sinornithomimus</i>        | -2.135   | 0.76934  | -0.21842 | -0.17045 | -0.75364 | 0.36046  | -0.03613 |
| Ther | <i>Sinosauropteryx</i>        | -1.9391  | 0        | -0.57259 | 0.006336 | -0.71296 | -0.05288 | 0.13043  |
| Ther | <i>Sinosauropteryx</i>        | -1.945   | 0.01     | -0.50796 | 0.020875 | -0.72712 | -0.06638 | 0.12439  |
| Ther | <i>Struthiomimus</i>          | -2.1469  | 0.77417  | -0.13829 | -0.15435 | -0.77275 | 0.35565  | -0.05463 |
| Ther | <i>Tyrannosaurus</i>          | -1.9281  | 0.01     | -0.52432 | 0.023031 | -0.72504 | -0.0693  | 0.13695  |
