# Supplementary material for: Assessing Arboreal Adaptations of Bird Antecedents: Testing the Ecological Setting of the Origin of the Avian Flight Stroke
Source: PubMed Central journal article supplement (PMC3153453; doi:10.1371/journal.pone.0022292), 2011-08-09
Supplement: pone.0022292.s022.pdf [file pone.0022292.s022.pdf]

| category | taxon                   | F     | T     | CI   | Ref               |
|----------|-------------------------|-------|-------|------|-------------------|
| BB       | <i>Archaeopteryx</i>    | 52.5  | 71    | 1.35 | [35]              |
| BB       | <i>Archaeopteryx</i>    | 37    | 52.5  | 1.42 | [35]              |
| BB       | <i>Archaeopteryx</i>    | 60.5  | 80.5  | 1.33 | [35]              |
| BB       | <i>Archaeopteryx</i>    | 48    | 71    | 1.48 | [35]              |
| BB       | <i>Archaeopteryx</i>    | 70    | 89.5  | 1.28 | [35]              |
| BB       | <i>Archaeopteryx</i>    | 50.3  | 74.6  | 1.48 | [35]              |
| BB       | <i>Changchengornis</i>  | 33.46 | 36.59 | 1.09 | [36]              |
| BB       | <i>Confuciusornis</i>   | 33    | 41    | 1.24 | [36]              |
| BB       | <i>Confuciusornis</i>   | 41.78 | 48.7  | 1.17 | [36]              |
| BB       | <i>Confuciusornis</i>   | 46.85 | 53.29 | 1.14 | [36]              |
| BB       | <i>Dalianraptor</i>     | 49    | 68    | 1.39 | [28]              |
| BB       | <i>GMV-2156</i>         | 14.5  | 17.1  | 1.18 | [79]              |
| BB       | <i>GMV-2158</i>         | 14.3  | 18    | 1.26 | [79]              |
| BB       | <i>GMV-2159</i>         | 17.2  | 21.6  | 1.26 | [79]              |
| BB       | <i>Jeholornis</i>       | 55.4  | 68.3  | 1.23 | [37]              |
| BB       | <i>Jixiangornis</i>     | 71.9  | 83.2  | 1.16 | [38]              |
| BB       | <i>Patagopteryx</i>     | 103   | 140   | 1.36 | [39]              |
| BB       | <i>Pengornis</i>        | 48    | 50.4  | 1.05 | [22]              |
| BB       | <i>Sapeornis</i>        | 74.4  | 81.7  | 1.1  | [40]              |
| BB       | <i>Shenzhouraptor</i>   | 55.4  | 68.3  | 1.23 | [41]              |
| BB       | <i>Sinornis</i>         | 21    | 26.4  | 1.26 | [23]              |
| BB       | <i>Yanornis</i>         | 66    | 78    | 1.18 | [80]              |
| BB       | <i>Yixianornis</i>      | 41    | 52.8  | 1.29 | [42]              |
| Ther     | <i>Achillobator</i>     | 505   | 490   | 0.97 | [53]              |
| Ther     | <i>Acrocanthosaurus</i> | 1153  | 865   | 0.75 | Pers. com. Currie |
| Ther     | <i>Afrovenator</i>      | 760   | 687   | 0.9  | [81]              |
| Ther     | <i>Albertosaurus</i>    | 1080  | 1030  | 0.95 | [43]              |
| Ther     | <i>Allosaurus</i>       | 850   | 690   | 0.81 | [24]              |
| Ther     | <i>Alxasaurus</i>       | 555   | 481   | 0.87 | [44]              |
| Ther     | <i>Anchiornis</i>       | 66.2  | 106.4 | 1.61 | [25]              |
| Ther     | <i>Australovenator</i>  | 578   | 569   | 0.98 | [82]              |
| Ther     | <i>Bambiraptor</i>      | 118   | 170   | 1.44 | [26]              |
| Ther     | <i>Beipiaosaurus</i>    | 265   | 275   | 1.04 | [83]              |
| Ther     | <i>Caudipteryx</i>      | 152   | 196   | 1.29 | [48]              |
| Ther     | <i>Caudipteryx</i>      | 145   | 183   | 1.26 | [49]              |
| Ther     | <i>Caudipteryx</i>      | 145   | 188   | 1.3  | [49]              |

|      |                           |        |        |      |                     |
|------|---------------------------|--------|--------|------|---------------------|
| Ther | <i>Ceratosaurus</i>       | 759    | 594    | 0.78 | [84]                |
| Ther | <i>Ceratosaurus</i>       | 630    | 520    | 0.83 | [84]                |
| Ther | <i>Ceratosaurus</i>       | 620    | 555    | 0.9  | [84]                |
| Ther | <i>Chilantosaurus</i>     | 1190   | 954    | 0.8  | [85]                |
| Ther | <i>Citipati</i>           | 415    | 450    | 1.08 | Pers. com Balanoff  |
| Ther | <i>Coelophysis</i>        | 209    | 224    | 1.07 | [51]                |
| Ther | <i>Coelophysis</i>        | 123    | 136    | 1.11 | [51]                |
| Ther | <i>Compsognathus</i>      | 67     | 87.7   | 1.31 | [27]                |
| Ther | <i>Compsognathus</i>      | 108.8  | 131.8  | 1.21 | [27]                |
| Ther | <i>Daspletosaurus</i>     | 1005   | 1022   | 1.02 | [43]                |
| Ther | <i>Deinonychus</i>        | 336    | 368    | 1.1  | [53]                |
| Ther | <i>Delatdromeus</i>       | 740    | 700    | 0.95 | [86]                |
| Ther | <i>Dilophosaurus</i>      | 557    | 555    | 1    | [54]                |
| Ther | <i>Elaphrosaurus</i>      | 520    | 608    | 1.17 | [87]                |
| Ther | <i>Epidendrosaurus</i>    | 16.5   | 19.25  | 1.17 | [55]                |
| Ther | <i>Epidendrosaurus</i>    | 16.2   | 18.9   | 1.17 | [55]                |
| Ther | <i>Epidexipteryx</i>      | 51     | 63     | 1.24 | [55]                |
| Ther | <i>Eustreptospondylus</i> | 498    | 479    | 0.96 | [88]                |
| Ther | <i>Falcarius</i>          | 394    | 430    | 1.09 | Pers com Zanno      |
| Ther | <i>Gallimimus</i>         | 665    | 740    | 1.11 | [58]                |
| Ther | <i>Gallimimus</i>         | 270    | 306    | 1.13 | [58]                |
| Ther | <i>Gaurdimimus</i>        | 371    | 388    | 1.05 | [89]                |
| Ther | <i>Gigantoraptor</i>      | 1100   | 1180   | 1.07 | [90]                |
| Ther | <i>Gorgosaurus</i>        | 1040   | 1000   | 0.96 | Pers. Com. Currie   |
| Ther | <i>Herrerasaurus</i>      | 345    | 345    | 1    | [62]                |
| Ther | <i>Huxiagnathus</i>       | 163.28 | 183.41 | 1.12 | [64]                |
| Ther | <i>Jinfengopteryx</i>     | 70.31  | 100.5  | 1.43 | [65]                |
| Ther | <i>Jurvenator</i>         | 52     | 58.1   | 1.12 | [66]                |
| Ther | <i>Khaan</i>              | 193    | 240    | 1.24 | Pers. com. Balanoff |
| Ther | <i>Limusaurus</i>         | 208    | 249    | 1.2  | [67]                |
| Ther | <i>Mahakala</i>           | 79     | 110    | 1.39 | [68]                |
| Ther | <i>Mapusaurus</i>         | 1300   | 1075   | 0.83 | [85]                |
| Ther | <i>Mei long</i>           | 81     | 108    | 1.33 | [30]                |
| Ther | <i>Microraptor gui</i>    | 97     | 124.4  | 1.28 | [7]                 |
| Ther | <i>Microraptor</i>        | 49.8   | 66     | 1.33 | Pers. com Xu        |
| Ther | <i>Microraptor</i>        | 74.75  | 94.22  | 1.26 | [31]                |
| Ther | <i>Microraptor</i>        | 74.77  | 95.51  | 1.28 | [31]                |
| Ther | <i>Mononykus</i>          | 138.6  | 175.2  | 1.26 | [69]                |

|      |                           |      |       |      |                    |       |
|------|---------------------------|------|-------|------|--------------------|-------|
| Ther | <i>Neimongosaurus</i>     | 366  | 310   | 0.85 |                    | [91]  |
| Ther | <i>Neovenator</i>         | 750  | 670   | 0.89 |                    | [92]  |
| Ther | <i>Neqwebasaurus</i>      | 118  | 140.7 | 1.19 |                    | [93]  |
| Ther | <i>Northronychus</i>      | 692  | 614   | 0.89 |                    | [70]  |
| Ther | <i>Ornithomimus</i>       | 435  | 475   | 1.09 |                    | [34]  |
| Ther | <i>Parvicursor</i>        | 52.6 | 75.6  | 1.44 |                    | [94]  |
| Ther | <i>Procompsognathus</i>   | 93.1 | 112.6 | 1.21 |                    | [95]  |
| Ther | <i>Protoarchaeopteryx</i> | 147  | 188   | 1.28 |                    | [73]  |
| Ther | <i>Rahonavis</i>          | 88   | 119.8 | 1.36 |                    | [96]  |
| Ther | <i>Raptorex</i>           | 338  | 397   | 1.17 |                    | [60]  |
| Ther | <i>Sauornitholestes</i>   | 214  | 283   | 1.32 |                    | [97]  |
| Ther | <i>Sauornithodes</i>      | 198  | 243   | 1.23 |                    | [87]  |
| Ther | <i>Similicaudipteryx</i>  | 220  | 240   | 1.09 |                    | [98]  |
| Ther | <i>Sinoraptor</i>         | 876  | 776   | 0.89 |                    | [99]  |
| Ther | <i>Sinornithoides</i>     | 140  | 190.6 | 1.36 |                    | [32]  |
| Ther | <i>Sinornithomimus</i>    | 323  | 347   | 1.07 |                    | [33]  |
| Ther | <i>Sinosauropteryx</i>    | 53.2 | 61    | 1.15 | Pers. com. Currie  |       |
| Ther | <i>Sinosauropteryx</i>    | 86.4 | 97    | 1.12 | Pers. com. Currie  |       |
| Ther | <i>Struthiomimus</i>      | 480  | 535   | 1.11 |                    | [34]  |
| Ther | <i>Struthiomimus</i>      | 502  | 556   | 1.11 |                    | [34]  |
| Ther | <i>Suchomimus</i>         | 1075 | 945   | 0.88 |                    | [85]  |
| Ther | <i>Syntarus</i>           | 208  | 223   | 1.07 |                    | [100] |
| Ther | <i>Tanycolagreus</i>      | 356  | 387   | 1.09 |                    | [76]  |
| Ther | <i>Tarbosaurus</i>        | 970  | 880   | 0.91 | Pers. com Currie   |       |
| Ther | <i>Tianyuraptor</i>       | 200  | 260   | 1.3  | Pers com. Sullivan |       |
| Ther | <i>Tugulusaurus</i>       | 215  | 240   | 1.12 |                    | [101] |
| Ther | <i>Tyrannosaurus</i>      | 1320 | 1245  | 0.94 | Pers. com. Currie  |       |
| Ther | <i>Tyrannosaurus</i>      | 1280 | 1166  | 0.91 | Pers. com. Currie  |       |
| Ther | <i>Velociraptor</i>       | 238  | 255   | 1.07 |                    | [103] |
| Ther | <i>Yangchuanosaurus</i>   | 850  | 755   | 0.89 |                    | [104] |
