# Supplementary material for: Assessing Arboreal Adaptations of Bird Antecedents: Testing the Ecological Setting of the Origin of the Avian Flight Stroke
Source: PubMed Central journal article supplement (PMC3153453; doi:10.1371/journal.pone.0022292), 2011-08-09
Supplement: pone.0022292.s023.pdf [file pone.0022292.s023.pdf]

| category | taxon                                | M (kg) | Leg L (mm) | F (mm) | T (mm) | TMT (mm) | Rleg L | TL    | RTL  | TMTL  | R TMTL | Ref  |
|----------|--------------------------------------|--------|------------|--------|--------|----------|--------|-------|------|-------|--------|------|
| A        | <i>Alcedo atthis</i>                 | 0.027  | 50.1       | 15.9   | 25.2   | 9        | 167.0  | 84.0  | 0.78 | 30.0  | 0.39   | [6]  |
| A        | <i>Ara macao</i>                     | 1.015  | 176.5      | 62     | 84.3   | 30.2     | 175.6  | 83.9  | 0.78 | 30.1  | 0.4    | [6]  |
| A        | <i>Carduelis chloris</i>             | 0.026  | 62.2       | 17     | 27.7   | 17.5     | 210.0  | 93.5  | 0.86 | 59.1  | 0.78   | [10] |
| A        | <i>Chaetura pelagic</i>              | 0.0236 | 51.3       | 15.8   | 23.7   | 11.8     | 178.8  | 82.6  | 0.76 | 41.1  | 0.54   | [6]  |
| A        | <i>Coccothraustes coccothraustes</i> | 0.058  | 76.9       | 21.5   | 34.2   | 21.2     | 198.7  | 88.4  | 0.82 | 54.8  | 0.72   | [10] |
| A        | <i>Coccyzus erythrophthalmus</i>     | 0.059  | 100        | 30.8   | 42.2   | 27       | 256.9  | 108.4 | 1    | 69.4  | 0.91   | [7]  |
| A        | <i>Delichon urbica</i>               | 0.0145 | 44.8       | 13.1   | 20.6   | 11.1     | 183.7  | 84.5  | 0.78 | 45.5  | 0.6    | [10] |
| A        | <i>Ficedula hypoleuca</i>            | 0.0122 | 55         | 13.4   | 24.4   | 17.2     | 238.9  | 106.0 | 0.98 | 74.7  | 0.98   | [10] |
| A        | <i>Hirundo daurica</i>               | 0.0222 | 50.5       | 13.6   | 23.3   | 13.6     | 179.7  | 82.9  | 0.77 | 48.4  | 0.64   | [10] |
| A        | <i>Loxia curvirostra</i>             | 0.0364 | 67.7       | 19.5   | 30.7   | 17.5     | 204.3  | 92.6  | 0.86 | 52.8  | 0.69   | [10] |
| A        | <i>Muscicapa striata</i>             | 0.0159 | 51.5       | 13.8   | 23     | 14.7     | 204.8  | 91.5  | 0.84 | 58.5  | 0.77   | [10] |
| A        | <i>Opisthocomus hoazin</i>           | 0.696  | 203        | 62.8   | 86.7   | 53.5     | 229.1  | 97.8  | 0.91 | 60.4  | 0.8    | [6]  |
| A        | <i>Regulus regulus</i>               | 0.0059 | 48         | 9.7    | 21.2   | 17.1     | 265.6  | 117.3 | 1.08 | 94.6  | 1.24   | [8]  |
| A        | <i>Riparia riparia</i>               | 0.013  | 40.5       | 11.4   | 19.1   | 10       | 172.2  | 81.2  | 0.75 | 42.5  | 0.56   | [8]  |
| Bop      | <i>Bubo virginanus</i>               | 1.154  | 257.5      | 76.9   | 118.6  | 62       | 245.5  | 113.1 | 1.06 | 59.1  | 0.79   | [15] |
| Bop      | <i>Buteo jamaicensis</i>             | 1.028  | 277.6      | 83.6   | 109.6  | 84.4     | 275.1  | 108.6 | 1.02 | 83.6  | 1.11   | [15] |
| BOP      | <i>Falco sparverius</i>              | 0.113  | 119.9      | 33.9   | 49.3   | 36.7     | 248.0  | 102.0 | 0.95 | 75.9  | 1      | [15] |
| BOP      | <i>Strix varia</i>                   | 0.632  | 230.8      | 69.7   | 103.4  | 57.7     | 268.9  | 120.5 | 1.12 | 67.2  | 0.89   | [15] |
| C        | <i>Certhia familiaris</i>            | 0.0091 | 45.1       | 10.8   | 19     | 15.3     | 216.0  | 91.0  | 0.84 | 73.3  | 0.96   | [8]  |
| C        | <i>Dryocopus pileatus</i>            | 0.308  | 131.4      | 41.9   | 53.5   | 36       | 194.6  | 79.2  | 0.74 | 53.3  | 0.71   | [6]  |
| C        | <i>Melanerpes erythrocephalus</i>    | 0.0716 | 98.2       | 30.5   | 40.7   | 27       | 236.5  | 98.0  | 0.91 | 65.0  | 0.86   | [6]  |
| C        | <i>Sitta europaea</i>                | 0.0226 | 61.6       | 16     | 26.5   | 19.1     | 217.9  | 93.7  | 0.87 | 67.6  | 0.89   | [10] |
| G        | <i>Luscinia megarhynchos</i>         | 0.0183 | 79.5       | 18.5   | 34.4   | 26.6     | 301.7  | 130.5 | 1.2  | 100.9 | 1.32   | [10] |
| G        | <i>Alauda amensis</i>                | 0.037  | 74.1       | 19.3   | 31.5   | 23.3     | 222.4  | 94.5  | 0.87 | 69.9  | 0.92   | [10] |
| G        | <i>Cinclus cinclus</i>               | 0.0642 | 97.7       | 23.4   | 43.6   | 30.7     | 244.0  | 108.9 | 1.01 | 76.7  | 1.01   | [11] |
| G        | <i>Columba livia</i>                 | 0.348  | 136.8      | 45.1   | 59.1   | 32.6     | 194.5  | 84.0  | 0.78 | 46.3  | 0.61   | [12] |
| G        | <i>Corvus corax</i>                  | 1.097  | 257.8      | 71.9   | 114.4  | 71.5     | 250.0  | 110.9 | 1.04 | 69.3  | 0.92   | [11] |
| G        | <i>Corvus frugilegus</i>             | 0.489  | 196.7      | 50.9   | 89     | 56.8     | 249.7  | 113.0 | 1.05 | 72.1  | 0.96   | [6]  |
| G        | <i>Crotophaga ani</i>                | 0.111  | 100        | 25.3   | 44.2   | 30.5     | 208.1  | 92.0  | 0.85 | 63.5  | 0.84   | [7]  |
| G        | <i>Fringilla coelebs</i>             | 0.0219 | 62.7       | 16.2   | 28.1   | 18.4     | 224.1  | 100.4 | 0.93 | 65.8  | 0.86   | [10] |
| G        | <i>Fringilla montiiringilla</i>      | 0.0226 | 64.5       | 16.6   | 29.3   | 18.6     | 228.1  | 103.6 | 0.96 | 65.8  | 0.86   | [10] |
| G        | <i>Galerida theckla</i>              | 0.0368 | 78.6       | 20.3   | 33.2   | 25.1     | 236.3  | 99.8  | 0.92 | 75.5  | 0.99   | [10] |
| G        | <i>Geococcyx sp.</i>                 | 0.376  | 201.6      | 53.9   | 85     | 62.7     | 279.3  | 117.8 | 1.1  | 86.9  | 1.15   | [7]  |
| G        | <i>Goura crisata</i>                 | 2      | 294.8      | 79     | 124.2  | 91.6     | 232.0  | 99.8  | 0.92 | 73.1  | 0.97   | [13] |
| G        | <i>Lullula arborea</i>               | 0.0269 | 69.5       | 17.7   | 29.9   | 21.9     | 247.9  | 94.4  | 0.92 | 94.7  | 0.96   | [10] |
| G        | <i>Melanocorypha calandra</i>        | 0.0616 | 97.9       | 23.2   | 37.3   | 37.4     | 223.6  | 98.9  | 0.87 | 74.8  | 1.25   | [10] |
| G        | <i>Oenanthe hispanica</i>            | 0.0164 | 82.5       | 19.9   | 36     | 26.6     | 324.7  | 141.7 | 1.31 | 104.7 | 1.37   | [10] |
| G        | <i>Oenanthe leucura</i>              | 0.041  | 77.1       | 17.2   | 34.1   | 25.8     | 240.1  | 107.9 | 0.91 | 78.2  | 0.98   | [10] |
| G        | <i>Parus alter</i>                   | 0.0091 | 50         | 11.8   | 22.2   | 16       | 239.5  | 106.3 | 0.98 | 76.6  | 1      | [8]  |
| G        | <i>Parus caeruleus</i>               | 0.011  | 53.4       | 12     | 24     | 17.4     | 237.2  | 103.8 | 0.99 | 77.8  | 1.03   | [10] |

|     |                                     |        |       |      |       |      |       |       |      |       |      |      |
|-----|-------------------------------------|--------|-------|------|-------|------|-------|-------|------|-------|------|------|
| G   | <i>Parus cristatus</i>              | 0.0122 | 54.6  | 12.8 | 23.9  | 17.9 | 240.4 | 107.3 | 0.96 | 74.9  | 1.02 | [8]  |
| G   | <i>Parus montanus</i>               | 0.0109 | 53.3  | 12.9 | 23.8  | 16.6 | 274.2 | 118.2 | 0.99 | 93.5  | 0.98 | [8]  |
| G   | <i>Phoenicurus ochruros</i>         | 0.0165 | 69.8  | 15.9 | 30.1  | 23.8 | 267.0 | 117.6 | 1.09 | 88.2  | 1.23 | [10] |
| G   | <i>Phoenicurus phoenicurus</i>      | 0.0147 | 65.4  | 15   | 28.8  | 21.6 | 262.3 | 112.8 | 1.08 | 81.4  | 1.16 | [10] |
| G   | <i>Pica pica</i>                    | 0.221  | 158.6 | 41.2 | 68.2  | 49.2 | 260.3 | 114.1 | 1.05 | 86.2  | 1.08 | [6]  |
| G   | <i>Saxicola rubetra</i>             | 0.0166 | 66.4  | 15.3 | 29.1  | 22   | 269.5 | 117.9 | 1.05 | 90.6  | 1.13 | [10] |
| G   | <i>Saxicola torquatus axillaris</i> | 0.0155 | 67.2  | 15.2 | 29.4  | 22.6 | 258.4 | 111.1 | 1.09 | 72.4  | 1.19 | [10] |
| G   | <i>Sturnus cineraceus</i>           | 0.071  | 107   | 31   | 46    | 30   | 236.6 | 104.7 | 1.03 | 69.4  | 0.96 | [12] |
| G   | <i>Sturnus vulgaris</i>             | 0.0876 | 105.1 | 27.8 | 46.5  | 30.8 | 243.4 | 107.1 | 0.97 | 72.8  | 0.91 | [11] |
| G   | <i>Turdus iliacus</i>               | 0.0612 | 95.9  | 25   | 42.2  | 28.7 | 226.5 | 98.5  | 0.99 | 68.7  | 0.96 | [10] |
| G   | <i>Turdus merula merula</i>         | 0.113  | 109.5 | 28.7 | 47.6  | 33.2 | 255.1 | 111.2 | 0.91 | 79.0  | 0.91 | [10] |
| G   | <i>Turdus philomelos</i>            | 0.0689 | 104.6 | 26.6 | 45.6  | 32.4 | 231.5 | 101.9 | 1.03 | 68.5  | 1.04 | [10] |
| G   | <i>Turdus viscivorus</i>            | 0.112  | 111.6 | 29.5 | 49.1  | 33   | 234.0 | 98.6  | 0.95 | 72.7  | 0.9  | [10] |
| Gb  | <i>Alectoris rufa</i>               | 0.516  | 169.4 | 55.4 | 72.8  | 41.2 | 211.2 | 90.8  | 0.85 | 51.4  | 0.68 | [6]  |
| Gb  | <i>Anas acuta</i>                   | 0.5    | 182.7 | 54.6 | 84.2  | 43.9 | 230.2 | 106.1 | 0.99 | 55.3  | 0.73 | [12] |
| Gb  | <i>Anhima cornuta</i>               | 3.15   | 409   | 99   | 184   | 126  | 279.0 | 125.5 | 1.18 | 86.0  | 1.15 | [12] |
| Gb  | <i>Ardea cinerea</i>                | 1.12   | 398   | 62   | 179   | 157  | 383.2 | 172.4 | 1.61 | 151.2 | 2.01 | [12] |
| Gb  | <i>Cariama cristata</i>             | 1.4    | 480   | 82   | 205   | 193  | 429.1 | 183.3 | 1.71 | 172.5 | 2.3  | [6]  |
| Gb  | <i>Chroicocephalus ridibundus</i>   | 0.228  | 164.5 | 42.4 | 75.9  | 46.2 | 269.3 | 124.2 | 1.16 | 75.6  | 1    | [12] |
| Gb  | <i>Dromaius novaehollandiae</i>     | 35     | 973   | 219  | 393   | 361  | 395.1 | 185.0 | 1.14 | 131.6 | 1.49 | [14] |
| Gb  | <i>Egretta garzetta</i>             | 0.376  | 285.2 | 56.7 | 133.5 | 95   | 297.5 | 120.1 | 1.72 | 110.4 | 1.74 | [12] |
| Gb  | <i>Gallus gallus</i>                | 0.988  | 313   | 91   | 128   | 94   | 314.3 | 128.5 | 1.2  | 94.4  | 1.26 | [11] |
| Gb  | <i>Meleagris gallopavo</i>          | 7.8    | 537   | 139  | 230   | 168  | 270.8 | 116.0 | 1.09 | 84.7  | 1.13 | [6]  |
| Gb  | <i>Rhea sp.</i>                     | 25     | 851   | 211  | 322   | 318  | 291.0 | 110.1 | 1.04 | 108.8 | 1.46 | [14] |
| Gb  | <i>Struthio camelus</i>             | 111    | 1301  | 300  | 524   | 477  | 270.7 | 109.0 | 1.04 | 99.3  | 1.34 | [14] |
| Avg |                                     |        |       |      |       |      |       | 107.7 |      | 75.7  |      |      |
