# Supplementary material for: Assessing Arboreal Adaptations of Bird Antecedents: Testing the Ecological Setting of the Origin of the Avian Flight Stroke
Source: PubMed Central journal article supplement (PMC3153453; doi:10.1371/journal.pone.0022292), 2011-08-09
Supplement: pone.0022292.s026.pdf [file pone.0022292.s026.pdf]

| category | taxon                     | PhIII1 | PhIII2 | PhIII3 | sum   | PPI  | Ref             |
|----------|---------------------------|--------|--------|--------|-------|------|-----------------|
| BB       | <i>Archaeopteryx</i>      | 9.6    | 9      | 8.2    | 26.8  | 1.79 | [35]            |
| BB       | <i>Archaeopteryx</i>      | 9      | 8      | 7      | 24    | 1.67 | [35]            |
| BB       | <i>Archaeopteryx</i>      | 12.7   | 11     | 9.5    | 33.2  | 1.61 | [35]            |
| BB       | <i>Archaeopteryx</i>      | 11     | 8.5    | 8.5    | 28    | 1.55 | [35]            |
| BB       | <i>Archaeopteryx</i>      | 14     | 13     | 10.5   | 37.5  | 1.68 | [35]            |
| BB       | <i>Archaeopteryx</i>      | 10.8   | 9.6    | 7.8    | 28.2  | 1.61 | [35]            |
| BB       | <i>Confuciuornis</i>      | 6      | 5      | 5      | 16    | 1.67 | [7]             |
| BB       | <i>Dalianraptor</i>       | 14     | 11     | 13     | 38    | 1.71 | [28]            |
| BB       | <i>Jeholornis</i>         | 10.9   | 10.6   | 7.3    | 28.8  | 1.64 | [7]             |
| BB       | <i>Pengornis</i>          | 8.6    | 7.9    | 8.8    | 25.3  | 1.94 | [7]             |
| BB       | <i>Shenzhouraptor</i>     | 10.9   | 10.6   | 7.3    | 28.8  | 1.64 | [41]            |
| BB       | <i>Sinornis</i>           | 4.3    | 3.6    | 3.9    | 11.8  | 1.74 | [23]            |
| BB       | <i>Yanornis</i>           | 14     | 11     | 10     | 35    | 1.5  | [80]            |
| BB       | <i>Yixianornis</i>        | 11.5   | 8.7    | 8.3    | 28.5  | 1.48 | [42]            |
| Ther     | <i>Albertosaurus</i>      | 145    | 105    | 85     | 335   | 1.31 | [43]            |
| Ther     | <i>Allosaurus</i>         | 110    | 90     | 66     | 266   | 1.42 | [24]            |
| Ther     | <i>Anchionis</i>          | 12.9   | 11.1   | 10.5   | 34.5  | 1.67 | [25]            |
| Ther     | <i>Bambiraptor</i>        | 27.8   | 15.4   | 16.9   | 60.1  | 1.16 | [26]            |
| Ther     | <i>Caudipteryx</i>        | 27     | 20     | 17     | 64    | 1.37 | [48]            |
| Ther     | <i>Caudipteryx</i>        | 23     | 17     | 13     | 53    | 1.3  | [49]            |
| Ther     | <i>Caudipteryx</i>        | 24     | 19     | 15     | 58    | 1.42 | [49]            |
| Ther     | <i>Chirostenotes</i>      | 75     | 52     | 58     | 185   | 1.47 | [112]           |
| Ther     | <i>Coelophysis</i>        | 36.2   | 30.5   | 26.6   | 93.3  | 1.58 | [51]            |
| Ther     | <i>Coelophysis</i>        | 21     | 16     | 13     | 50    | 1.38 | [51]            |
| Ther     | <i>Compsognathus</i>      | 17     | 13.65  | 11.5   | 42.15 | 1.48 | [27]            |
| Ther     | <i>Deinonychus</i>        | 64.4   | 44     | 41.3   | 149.7 | 1.32 | [52]            |
| Ther     | <i>Dilophosaurus</i>      | 110    | 84     | 70     | 264   | 1.4  | [54]            |
| Ther     | <i>Epidendrosaurus</i>    | 2.5    | 2      | 2.5    | 7     | 1.8  | [55]            |
| Ther     | <i>Eustreptospondylus</i> | 80     | 65     | 54     | 199   | 1.49 | [88]            |
| Ther     | <i>Gallimimus</i>         | 90     | 70     | 50     | 210   | 1.33 | [58]            |
| Ther     | <i>Gallimimus</i>         | 44     | 35     | 24     | 103   | 1.34 | [58]            |
| Ther     | <i>Gorgosaurus</i>        | 163    | 122    | 93     | 378   | 1.32 | Pers com Currie |
| Ther     | <i>Herrerasaurus</i>      | 55     | 38     | 34     | 127   | 1.31 | [62]            |
| Ther     | <i>Huxiagnathus</i>       | 31.17  | 29.44  | 23.62  | 84.23 | 1.7  | Pers. Com Hwang |
| Ther     | <i>Jurvenator</i>         | 11.9   | 8.1    | 7.4    | 27.4  | 1.3  | [66]            |
| Ther     | <i>Limusaurus</i>         | 36     | 26     | 20     | 82    | 1.28 | [67]            |
| Ther     | <i>Microraptor</i>        | 8.9    | 5.5    | 5      | 19.4  | 1.18 | Pers. com Xu    |
| Ther     | <i>Microraptor gui</i>    | 14.4   | 10.3   | 9.8    | 34.5  | 1.4  | [7]             |
| Ther     | <i>Microraptor</i>        | 9.95   | 7.74   | 6.13   | 23.82 | 1.39 | [31]            |
| Ther     | <i>Microraptor</i>        | 10.05  | 8.24   | 7.88   | 26.17 | 1.6  | [31]            |
| Ther     | <i>Ornithomimus</i>       | 74     | 50     | 43     | 167   | 1.26 | [34]            |

|      |                          |      |      |      |       |      |                     |
|------|--------------------------|------|------|------|-------|------|---------------------|
| Ther | <i>Procompsognathus</i>  | 17.1 | 15.2 | 12   | 44.3  | 1.59 | [95]                |
| Ther | <i>Rahonavis</i>         | 19   | 12.4 | 10   | 41.4  | 1.18 | [96]                |
| Ther | <i>Similicaudipteryx</i> | 46   | 34   | 32   | 112   | 1.43 | [98]                |
| Ther | <i>Sinoraptor</i>        | 124  | 83   | 64   | 271   | 1.19 | [99]                |
| Ther | <i>Sinornithoides</i>    | 27.6 | 20   | 16   | 63.6  | 1.3  | [32]                |
| Ther | <i>Sinornithosaurus</i>  | 25   | 17.5 | 16.5 | 59    | 1.36 | Pers. com Xu        |
| Ther | <i>Sinosauropteryx</i>   | 10   | 7    | 6.8  | 23.8  | 1.38 | Pers. com Currie    |
| Ther | <i>Sinosauropteryx</i>   | 16.7 | 11.2 | 9.4  | 37.3  | 1.23 | Pers. com Currie    |
| Ther | <i>Struthiomimus</i>     | 78   | 54   | 39   | 171   | 1.19 | Pers. com Currie    |
| Ther | <i>Struthiomimus</i>     | 83   | 64   | 52   | 199   | 1.4  | [34]                |
| Ther | <i>Syntarus</i>          | 37   | 29   | 24   | 90    | 1.43 | [100]               |
| Ther | <i>Tanycolagreus</i>     | 73   | 55   | 41   | 169   | 1.32 | [76]                |
| Ther | <i>Tarbosaurus</i>       | 135  | 60   | 100  | 295   | 1.19 | Pers. com Currie    |
| Ther | <i>Tianyuraptor</i>      | 48   | 32   | 27   | 107   | 1.23 | Pers. com. Sullivan |
| Ther | <i>Troodon</i>           | 66   | 41.2 | 39.3 | 146.5 | 1.22 | [105]               |
| Ther | <i>Tyrannosaurus</i>     | 201  | 136  | 122  | 459   | 1.28 | Pers. com Currie    |
