# Supplementary material for: Assessing Arboreal Adaptations of Bird Antecedents: Testing the Ecological Setting of the Origin of the Avian Flight Stroke
Source: PubMed Central journal article supplement (PMC3153453; doi:10.1371/journal.pone.0022292), 2011-08-09
Supplement: pone.0022292.s027.pdf [file pone.0022292.s027.pdf]

| taxon            | FL   | HL   | BI   | CI   | MPI  | PPI  |
|------------------|------|------|------|------|------|------|
| Theropoda        | 0.46 | 0.96 | 0.74 | 1.06 | 1.36 | 1.34 |
| Neotheropoda     | 0.36 | 0.87 | 0.66 | 1.06 | 1.23 | 1.38 |
| Ceratosauria     | 0.29 | N/A  | 0.58 | 1.04 | 1.14 | 1.36 |
| Tetanurae        | N/A  | 0.85 | 0.62 | 98   | 1.29 | 1.4  |
| Avetheropoda     | 0.31 | 0.87 | 0.7  | 98   | 1.49 | 1.36 |
| Coelurosauria    | 0.32 | 0.91 | 0.74 | 1.06 | 1.57 | 1.35 |
| Coelurosauria A  | 0.39 | 0.92 | 0.77 | 1.12 | 1.5  | 1.4  |
| Maniraptorformes | 0.49 | 0.96 | 0.8  | 1.13 | 1.52 | 1.42 |
| Maniraptora      | 0.61 | 1.04 | 0.82 | 1.17 | 1.53 | 1.49 |
| Paraves          | 0.78 | 1.05 | 0.82 | 1.22 | 1.52 | 1.61 |
| Eumaniraptora    | 0.92 | 1.11 | 0.89 | 1.3  | 1.4  | 1.54 |
| Troodontidea     | 0.96 | 1.21 | 0.87 | 1.34 | 1.4  | 1.46 |
| Dromeosaurida    | 0.9  | 1.22 | 0.91 | 1.28 | 1.33 | 1.25 |
| Microraptor sp   | 1.01 | 1.41 | 0.87 | 1.29 | 1.08 | 1.36 |
| Aves             | 1.04 | 1.09 | 0.9  | 1.3  | 1.3  | 1.6  |
| Aves A           | 1.17 | 1.03 | 0.92 | 1.26 | 1.18 | 1.63 |
| Pygostylia       | 1.09 | 1.01 | 0.89 | 1.23 | N/A  | 1.64 |
| Ornithurae       | 1.12 | 1.08 | 0.85 | 1.26 | 1    | 1.61 |
