# Supplementary material for: Assessing Arboreal Adaptations of Bird Antecedents: Testing the Ecological Setting of the Origin of the Avian Flight Stroke
Source: PLoS One. 2011 Aug 9;6(8):e22292. doi: 10.1371/journal.pone.0022292 (PMC3153453; doi:10.1371/journal.pone.0022292)
Supplement: Table S1 — Cluster analysis of total data. A = Arboreal, A fossil = extinct fossil taxa, An = ankle mobility (0 = anterioposterior only, 1 = moderate movement in all 3 planes, 2 = highly mobile),BB = basal bird, BOP = bird of prey, C = climbing bird, CI = Crural index, C = Claw geometry (0 = straight, 1 = recurved, 2 = highly recurved), Fl = relative forelimb length (Humerus+Ulna/trunk), G = ground forager, GB = ground based, Hal = Hallux orientation (0 = in line with other digits, 1 = divergent, 2 = opposable, 3 = zygodactyl), HFR = Hindfoot reversal (0 = no, 1 = yes), Hip = femoral abduction ability (0 = low, little to no abduction occurs, 1 = moderate, limited abduction ability during locomotion, 2 = highly mobile), HL = relative hindlimb length (femur+tibia/trunk), H/U = Humerus divided by ulna, MPI = Manual phalangeal index(non-ungual phalanges/metacarpal), PPI = Pedal phalangeal index (non-ungual phalanges/metatarsals, in theropods PhIII 2+3/Ph III-1), Pol = Pollex orientation(0 = inline, 1 = capable of securing item with a “scissor grip”, 2 = opposable), Pro = forearm pronation/supination (0 = none, 1 = yes), Scan = Scansorial, SH = Shoulder (humerus-glenoid joint mobility) (0 = limited to anterioposterior movement, 1 = moderate movement in all 3 planes, 2 = highly mobile even cricumduction), ST = Stance (0 = plantigrade, 1 = sub ungaligrade, 2 = digigrade), Terr = Terrestrial, Tail = tail prehensile/support ability (0 = none, 1 = yes). For all extant avians and Sinornis, Confuciusornis and Pengornis, given the horizontal position of the femora CI index was taken as the tarsometatarsus/tibia. (PDF) [file pone.0022292.s014.pdf]

| category | taxon                                   | FL   | St | HL   | SH | BI   | Pro | Wr | MPI  | Pol | Hi<br>p | CI   | HF<br>R | An | C | PPI  | Hal | Tail | Ref           |
|----------|-----------------------------------------|------|----|------|----|------|-----|----|------|-----|---------|------|---------|----|---|------|-----|------|---------------|
| A        | <i>Aotus trivirgatus</i>                | 0.67 | 0  | 0.9  | 2  | 0.91 | 1   | 2  | 1.52 | 2   | 2       | 0.98 | 0       | 2  | 0 | 0.9  | 2   | 0    | ROM<br>94422  |
| A        | <i>Arctictis binturong</i>              | 0.71 | 0  | 0.77 | 2  | 0.79 | 1   | 1  | 1.08 | 0   | 1       | 0.91 | 1       | 2  | 2 | ?    | 0   | 1    | [1]           |
| A        | <i>Bradypus tridactylus</i>             | 1.12 | 0  | 0.59 | 2  | 0.82 | 1   | 2  | 2.56 | 0   | 1       | 0.88 | 1       | 2  | 2 | 2.57 | 0   | 0    | RM<br>5027    |
| A        | <i>Callithrix jacchus</i>               | 0.71 | 0  | 0.93 | 2  | 0.88 | 1   | 2  | 1.4  | 1   | 2       | 1.05 | 0       | 2  | 2 | 0.8  | 2   | 0    | ROM<br>101192 |
| A        | <i>Caluromys lanatus</i>                | 0.56 | 0  | 0.74 | 2  | 1.08 | 1   | 2  | 1.57 | 2   | 2       | 1.01 | 1       | 2  | 2 | 1.44 | 2   | 2    | ROM<br>1029   |
| A        | <i>Cebuella pygmaea</i>                 | 0.86 | 0  | 1.01 | 2  | 0.9  | 1   | 2  | ?    | 1   | 2       | 1.04 | 0       | 2  | 2 | ?    | 2   | 0    | ROM<br>44689  |
| A        | <i>Cercopithecus cephus</i>             | 0.73 | 0  | 0.9  | 2  | 0.97 | 1   | 2  | 1.52 | 2   | 2       | 0.97 | 0       | 2  | 0 | 1.17 | 2   | 0    | ROM<br>57228  |
| A        | <i>Chamaeleo calypttratus</i>           | 0.49 | 0  | 0.47 | 2  | 0.9  | 1   | 2  | 0.87 | 3   | 1       | 0.84 | 1       | 2  | 1 | 0.85 | 3   | 2    | ROM<br>7981   |
| A        | <i>Daubbentonia<br/>madagascarensis</i> | 0.78 | 0  | 1.06 | 2  | 1    | 1   | 2  | 3.41 | 2   | 2       | 0.9  | 1       | 2  | 2 | 1.49 | 2   | 0    | RM 2367       |
| A        | <i>Dendrolagus insutus</i>              | 0.63 | 0  | 0.81 | 2  | 1.02 | 1   | 1  | 1.23 | 1   | 1       | 1.07 | 0       | 1  | 2 | 0.83 | 0   | 1    | ROM<br>86035  |
| A        | <i>Erthizon dorsatum</i>                | 0.62 | 0  | 0.69 | 1  | 0.95 | 1   | 1  | 1.2  | 1   | 1       | 0.93 | 1       | 2  | 2 | 1    | 2   | 0    | RM 5036       |
| A        | <i>Galaucomys sabrinus</i>              | 0.8  | 0  | 0.98 | 2  | 1.12 | 1   | 2  | 1.47 | 1   | 2       | 1.23 | 1       | 2  | 2 | 0.68 | 0   | 0    | ROM 684       |
| A        | <i>Galaucomys volans</i>                | 0.84 | 0  | 1.01 | 2  | 1.1  | 1   | 2  | 1.7  | 1   | 2       | 1.13 | 1       | 2  | 2 | 0.84 | 0   | 0    | ROM<br>92110  |
| A        | <i>Gymnobleidus<br/>leadbeateri</i>     | 0.63 | 0  | 0.89 | 2  | 1.13 | 1   | 2  | 1.65 | 2   | 2       | 1.07 | 0       | 2  | 2 | 1.67 | 2   | 0    | ROM<br>101194 |
| A        | <i>Lagothrix sp.</i>                    | 0.94 | 0  | 0.96 | 2  | 0.87 | 1   | 2  | 1.58 | 2   | 2       | 1.01 | 0       | 2  | 0 | 1.11 | 2   | 2    | ROM 196       |
| A        | <i>Lemur fulvus</i>                     | 0.8  | 0  | 1.16 | 2  | 1.06 | 1   | 2  | 1.54 | 2   | 2       | 0.96 | 0       | 2  | 0 | 1.46 | 2   | 0    | Rom<br>68120  |
| A        | <i>Leontopithecus sp.</i>               | 0.71 | 0  | 0.92 | 2  | 0.9  | 1   | 2  | 1.44 | 1   | 2       | 1.02 | 0       | 2  | 2 | 0.95 | 2   | 0    | RM 2376       |
| A        | <i>Loris tardigradus</i>                | 1.03 | 0  | 1.07 | 2  | 1.06 | 1   | 2  | 1.68 | 2   | 2       | 0.96 | 1       | 2  | 0 | 1.52 | 2   | 0    | RM 2369       |
| A        | <i>Manis tetradactyla</i>               | 0.44 | 0  | 0.58 | 1  | 0.58 | 1   | 1  | 1.35 | 0   | 1       | 0.85 | 0       | 2  | 2 | 0.72 | 0   | 2    | RM 5024       |
| A        | <i>Otolemur sp.</i>                     | 0.82 | 0  | 1.14 | 2  | 1.03 | 1   | 2  | 1.71 | 2   | 1       | 0.91 | 1       | 2  | 0 | ?    | 2   | 0    | ROM<br>64976  |
| A        | <i>Perodicticus potto</i>               | 0.75 | 0  | 0.84 | 2  | 0.95 | 1   | 2  | 1.49 | 2   | 2       | 0.96 | 1       | 2  | 0 | 1.72 | 2   | 0    | ROM<br>1184   |
| A        | <i>Petaurista grandis</i>               | 0.63 | 0  | 0.81 | 2  | 1.01 | 1   | 2  | 1.67 | 1   | 2       | 1.05 | 1       | 2  | 2 | 0.86 | 0   | 0    | ROM 588       |
| A        | <i>Potos flavus</i>                     | 0.62 | 0  | 0.7  | 2  | 0.8  | 1   | 2  | 1.45 | 2   | 2       | 0.96 | 1       | 2  | 0 | 1.07 | 2   | 2    | ROM<br>1192   |
| A        | <i>Saguinus sp.</i>                     | 0.7  | 0  | 0.92 | 2  | 0.89 | 1   | 2  | 1.38 | 1   | 2       | 1    | 0       | 2  | 2 | 0.86 | 2   | 0    | ROM           |

|          |                                   |      |   |      |   |      |   |   |      |   |   |      |   |   |   |      |   |   |                   |
|----------|-----------------------------------|------|---|------|---|------|---|---|------|---|---|------|---|---|---|------|---|---|-------------------|
|          |                                   |      |   |      |   |      |   |   |      |   |   |      |   |   |   |      |   |   | 20131             |
| A        | <i>Saimiri sciureus</i>           | 0.74 | 0 | 0.91 | 2 | 0.94 | 1 | 2 | 1.41 | 1 | 2 | 1.02 | 0 | 2 | 2 | 0.97 | 2 | 0 | ROM<br>1027       |
| A        | <i>Scurius carolinesis</i>        | 0.54 | 0 | 0.72 | 1 | 0.95 | 1 | 2 | 1.4  | 1 | 2 | 1.15 | 1 | 2 | 2 | 0.79 | 0 | 0 | ROM<br>87572      |
| A        | <i>Tarsius spectrum</i>           | 1.12 | 1 | 2.12 | 2 | 1.31 | 1 | 2 | 2.41 | 2 | 1 | 1.01 | 1 | 2 | 2 | 1.57 | 2 | 1 | RM 2400           |
| A-Fossil | <i>Megalancosaurus</i>            | 0.53 | 0 | 0.54 | 2 | 0.68 | 1 | 2 | 1.71 | 3 | 2 | 0.62 | 1 | 2 | 2 | 2.5  | 2 | 2 | [2]               |
| A-Fossil | <i>Vallesaurus</i>                | 0.4  | 0 | 0.55 | 2 | 0.6  | 1 | 2 | 2.5  | 0 | 2 | 0.69 | ? | 2 | 2 | 3.1  | 2 | 2 | [3]               |
| A-Fossil | <i>Sumina</i>                     | 0.61 | 0 | 0.8  | 2 | 0.84 | 1 | 1 | 2.32 | 2 | 2 | 0.82 | ? | 1 | 1 | 1.6  | 2 | 1 | [4], pers<br>com. |
| B-A      | <i>Alcedo atthis</i>              | ?    | 2 | ?    | ? | ?    | ? | ? | ?    | ? | 0 | 0.36 | 0 | 0 | 2 | 2.11 | 2 | 0 | [5,6]             |
| B-A      | <i>Ara severus</i>                | ?    | 2 | ?    | ? | ?    | ? | ? | ?    | ? | 0 | 0.37 | 0 | 0 | 2 | 1.96 | 3 | 0 | [5,6]             |
| B-A      | <i>Chaetura pelagica</i>          | ?    | 2 | ?    | ? | ?    | ? | ? | ?    | ? | 0 | 0.5  | 0 | 0 | 2 | 4.32 | 2 | 0 | [5,6]             |
| B-A      | <i>Coccyzus erythrophthalmus</i>  | ?    | 2 | ?    | ? | ?    | ? | ? | ?    | ? | 0 | 0.64 | 0 | 0 | 2 | 2.2  | 3 | 0 | [5,7]             |
| B-A      | <i>Opisthocomus hoazin</i>        | ?    | 2 | ?    | ? | ?    | ? | ? | ?    | ? | 0 | 0.62 | 0 | 0 | 2 | 1.97 | 2 | 0 | [5,6]             |
| B-C      | <i>Certhia familiaris</i>         | ?    | 2 | ?    | ? | ?    | ? | ? | ?    | ? | 0 | 0.81 | 0 | 0 | 2 | 2.16 | 2 | 0 | [5,8]             |
| B-C      | <i>Dryocopus pileatus</i>         | ?    | 2 | ?    | ? | ?    | ? | ? | ?    | ? | 0 | 0.67 | 0 | 0 | 2 | 2.89 | 3 | 1 | [5,9]             |
| B-C      | <i>Melanerpes erythrocephalus</i> | ?    | 2 | ?    | ? | ?    | ? | ? | ?    | ? | 0 | 0.65 | 0 | 0 | 2 | 2.18 | 3 | 1 | [5,9]             |
| B-C      | <i>Sitta europaea</i>             | ?    | 2 | ?    | ? | ?    | ? | ? | ?    | ? | 0 | 0.72 | 0 | 0 | 2 | 2.29 | 2 | 0 | [5,10]            |
| B-G      | <i>Cinclus cinclus</i>            | ?    | 2 | ?    | ? | ?    | ? | ? | ?    | ? | 0 | 0.7  | 0 | 0 | 1 | 1.9  | 2 | 0 | [5,11]            |
| B-G      | <i>Columba livia</i>              | ?    | 2 | ?    | ? | ?    | ? | ? | ?    | ? | 0 | 0.55 | 0 | 0 | 1 | 1.45 | 2 | 0 | [5,12]            |
| B-G      | <i>Corvus corax</i>               | ?    | 2 | ?    | ? | ?    | ? | ? | ?    | ? | 0 | 0.63 | 0 | 0 | 2 | 2.11 | 2 | 0 | [5,11]            |
| B-G      | <i>Corvus frugilegus</i>          | ?    | 2 | ?    | ? | ?    | ? | ? | ?    | ? | 0 | 0.64 | 0 | 0 | 1 | 1.97 | 2 | 0 | [5,6]             |
| B-G      | <i>Crotophaga ani</i>             | ?    | 2 | ?    | ? | ?    | ? | ? | ?    | ? | 0 | 0.69 | 0 | 0 | 1 | 1.70 | 3 | 0 | [5,7]             |
| B-G      | <i>Geococcyx sp.</i>              | ?    | 2 | ?    | ? | ?    | ? | ? | ?    | ? | 0 | 0.74 | 0 | 0 | 1 | 1.64 | 3 | 0 | [5,7]             |
| B-G      | <i>Goura crisata</i>              | ?    | 2 | ?    | ? | ?    | ? | ? | ?    | ? | 0 | 0.74 | 0 | 0 | 1 | 1.35 | 2 | 0 | [5,13]            |
| B-G      | <i>Melanocorypha calandra</i>     | ?    | 2 | ?    | ? | ?    | ? | ? | ?    | ? | 0 | 1    | 0 | 0 | 1 | 1.43 | 2 | 0 | [5,10]            |
| B-G      | <i>Pica Pica</i>                  | ?    | 2 | ?    | ? | ?    | ? | ? | ?    | ? | 0 | 0.72 | 0 | 0 | 1 | 1.93 | 2 | 0 | [5,6]             |
| B-G      | <i>Sturnus vulgaris</i>           | ?    | 2 | ?    | ? | ?    | ? | ? | ?    | ? | 0 | 0.66 | 0 | 0 | 1 | 1.88 | 2 | 0 | [5,11]            |
| B-G      | <i>Turdus philomelos</i>          | ?    | 2 | ?    | ? | ?    | ? | ? | ?    | ? | 0 | 0.71 | 0 | 0 | 1 | 2.28 | 2 | 0 | [5,10]            |
| B-GB     | <i>Alectornis sp.</i>             | ?    | 2 | ?    | ? | ?    | ? | ? | ?    | ? | 0 | 0.56 | 0 | 0 | 1 | 1.52 | 1 | 0 | [5,6]             |
| B-GB     | <i>Anhima cornuta</i>             | ?    | 2 | ?    | ? | ?    | ? | ? | ?    | ? | 0 | 0.68 | 0 | 0 | 0 | 1.59 | 1 | 0 | [5,6]             |
| B-GB     | <i>Cariama cristata</i>           | ?    | 2 | ?    | ? | ?    | ? | ? | ?    | ? | 0 | 0.94 | 0 | 0 | 1 | 1.05 | 0 | 0 | [5,6]             |
| B-GB     | <i>Dromaius</i>                   | ?    | 2 | ?    | ? | ?    | ? | ? | ?    | ? | 0 | 0.92 | 0 | 0 | 0 | 1    | 0 | 0 | [5,14]            |

|      |                                |      |   |      |   |      |   |   |      |   |   |      |   |   |   |      |   |   |                   |
|------|--------------------------------|------|---|------|---|------|---|---|------|---|---|------|---|---|---|------|---|---|-------------------|
|      | <i>novaeollandiae</i>          |      |   |      |   |      |   |   |      |   |   |      |   |   |   |      |   |   |                   |
| B-GB | <i>Gallus gallus</i>           | ?    | 2 | ?    | ? | ?    | ? | ? | ?    | ? | 0 | 0.73 | 0 | 0 | 0 | 1.43 | 1 | 0 | [5,11]            |
| B-GB | <i>Meleagris gallopavo</i>     | ?    | 2 | ?    | ? | ?    | ? | ? | ?    | ? | 0 | 0.73 | 0 | 0 | 1 | 1.54 | 1 | 0 | [5,6]             |
| B-GB | <i>Rhea sp.</i>                | ?    | 2 | ?    | ? | ?    | ? | ? | ?    | ? | 0 | 0.99 | 0 | 0 | 0 | 0.9  | 0 | 0 | [5,14]            |
| B-GB | <i>Struthio camelus</i>        | ?    | 2 | ?    | ? | ?    | ? | ? | ?    | ? | 0 | 0.91 | 0 | 0 | 0 | 0.93 | 0 | 0 | [5,14]            |
| BOP  | <i>Bubo virginianus</i>        | ?    | 2 | ?    | ? | ?    | ? | ? | ?    | ? | 0 | 0.53 | 0 | 0 | 2 | 2.9  | 2 | 0 | [5,15]            |
| BOP  | <i>Buteo jamaicensis</i>       | ?    | 2 | ?    | ? | ?    | ? | ? | ?    | ? | 0 | 0.77 | 0 | 0 | 2 | 1.35 | 2 | 0 | [5,15]            |
| BOP  | <i>Falco sparverius</i>        | ?    | 2 | ?    | ? | ?    | ? | ? | ?    | ? | 0 | 0.74 | 0 | 0 | 2 | 1.48 | 2 | 0 | [5,15]            |
| BOP  | <i>Strix varia</i>             | ?    | 2 | ?    | ? | ?    | ? | ? | ?    | ? | 0 | 0.56 | 0 | 0 | 2 | 3.34 | 2 | 0 | [5,15]            |
| Liz  | <i>Anolis sp.</i>              | 0.44 | 0 | 0.62 | 1 | 0.77 | 1 | 2 | 4.00 | 0 | 1 | 1.00 | 1 | 2 | 2 | 1.67 | 0 | 0 | RM                |
| Liz  | <i>Crotaphytus collaris</i>    | 0.42 | 0 | 0.74 | 1 | 0.8  | 1 | 2 | 0.93 | 0 | 1 | 1.01 | 1 | 2 | 2 | 0.75 | 0 | 0 | RM                |
| Liz  | <i>Draco sp.</i>               | 0.47 | 0 | 0.49 | 1 | 0.85 | 1 | 2 | 3.00 | 0 | 1 | 0.67 | 1 | 2 | 2 | 2    | 0 | 0 | RM 4789           |
| Liz  | <i>Lacerta agilis</i>          | 0.22 | 0 | 0.23 | 1 | 0.63 | 1 | 2 | 1.33 | 0 | 1 | 0.64 | 1 | 2 | 2 | 2.2  | 0 | 0 | RM                |
| Liz  | <i>Phrynosome solare</i>       | 0.51 | 0 | 0.55 | 1 | 0.86 | 1 | 2 | 1.33 | 0 | 1 | 1.00 | 1 | 2 | 2 | 1.2  | 0 | 0 | RM 4790           |
| Liz  | <i>Varanus niloticus</i>       | 0.33 | 0 | 0.37 | 1 | 0.99 | 1 | 2 | 1.3  | 0 | 1 | 0.78 | 1 | 2 | 2 | 1    | 0 | 0 | RM 5003           |
| Liz  | <i>Xuanlong zhaoi</i>          | 0.33 | 0 | 0.75 | 1 | 0.67 | 1 | 2 | 2.57 | 0 | 1 | 0.78 | 1 | 2 | 2 | 2.15 | 0 | 0 | [16]              |
| Scan | <i>Aliurus filgens</i>         | 0.57 | 0 | 0.62 | 1 | 0.79 | 1 | 2 | 1.52 | 2 | 2 | 0.98 | 0 | 2 | 2 | 1.06 | 0 | 0 | ROM 663           |
| Scan | <i>Chlorocebus pygerythrus</i> | 0.92 | 0 | 1.05 | 2 | 0.98 | 1 | 2 | 1.52 | 2 | 2 | 0.93 | 0 | 2 | 0 | 1.22 | 2 | 0 | ROM 011301        |
| Scan | <i>Didelphis sp.</i>           | 0.63 | 0 | 0.77 | 1 | 1.04 | 1 | 2 | 0.98 | 1 | 1 | 1.05 | 1 | 2 | 2 | 0.98 | 2 | 2 | RM 5019           |
| Scan | <i>Felis catus</i>             | 0.68 | 2 | 0.8  | 1 | 0.99 | 1 | 1 | 0.73 | 0 | 1 | 1.07 | 0 | 1 | 2 | 0.67 | 0 | 0 | RM 5071           |
| Scan | <i>Genetta genetta</i>         | 0.52 | 1 | 0.65 | 1 | 0.8  | 1 | 2 | 1.02 | 0 | 1 | 1.02 | 0 | 1 | 2 | 0.6  | 0 | 0 | ROM 114614        |
| Scan | <i>Gulo gulo</i>               | 0.55 | 0 | 0.6  | 1 | 0.82 | 1 | 1 | ?    | 0 | 1 | 1    | 0 | 1 | 2 | ?    | 0 | 0 | [17-19] pers.obs. |
| Scan | <i>Lemur catta</i>             | 0.8  | 0 | 1.18 | 2 | 1.04 | 1 | 1 | 1.28 | 2 | 1 | 0.94 | 0 | 2 | 0 | 0.97 | 2 | 0 | ROM 114614        |
| Scan | <i>Leopardus pardal</i>        | 0.50 | 2 | 0.59 | 1 | 1.15 | 1 | 1 | ?    | 0 | 1 | 1.00 | 0 | 1 | 2 | ?    | 0 | 0 | [20]              |
| Scan | <i>Leptailurus serval</i>      | 0.49 | 2 | 0.62 | 1 | 1.04 | 1 | 1 | ?    | 0 | 1 | 1.06 | 0 | 1 | 2 | ?    | 0 | 0 | [20]              |
| Scan | <i>Marmosa mexicana</i>        | 0.61 | 0 | 0.77 | 1 | 1.08 | 1 | 1 | 1.5  | 1 | 1 | 1.12 | 0 | 1 | 2 | 1.3  | 2 | 2 | ROM 96318         |
| Scan | <i>Martes americana</i>        | 0.48 | 0 | 0.62 | 1 | 0.78 | 1 | 1 | 1.42 | 0 | 2 | 1.15 | 1 | 2 | 2 | 0.69 | 0 | 0 | RM 621            |
| Scan | <i>Martes pennanti</i>         | 0.5  | 0 | 0.62 | 1 | 0.78 | 1 | 1 | 1.22 | 0 | 2 | 1.09 | 1 | 2 | 2 | 0.81 | 0 | 0 | RM 623            |
| Scan | <i>Monodelphis sp.</i>         | 0.52 | 0 | 0.65 | 1 | 0.93 | 1 | 1 | 0.94 | 2 | 1 | 1.06 | 0 | 2 | 2 | 0.92 | 2 | 2 | ROM 98909         |
| Scan | <i>Nasua narica</i>            | 0.63 | 0 | 0.7  | 1 | 1    | 1 | 1 | 0.89 | 0 | 2 | 0.97 | 0 | 2 | 1 | 0.82 | 0 | 0 | ROM 749           |

|      |                                     |      |   |      |   |      |   |   |      |   |   |      |   |   |   |      |   |   |               |
|------|-------------------------------------|------|---|------|---|------|---|---|------|---|---|------|---|---|---|------|---|---|---------------|
| Scan | <i>Panthera pardus</i>              | 0.55 | 2 | 0.71 | 1 | 1.09 | 1 | 1 | ?    | 0 | 1 | 1.20 | 0 | 1 | 2 | ?    | 0 | 0 | [20]          |
| Scan | <i>Papio papio</i>                  | 1.04 | 0 | 1.13 | 1 | 0.98 | 1 | 1 | 1.52 | 2 | 1 | 0.93 | 0 | 1 | 0 | 0.91 | 2 | 0 | ROM<br>88612  |
| Scan | <i>Procavia capensis</i>            | 0.46 | 0 | 0.5  | 0 | 0.58 | 0 | 2 | 0.83 | 0 | 0 | 0.96 | 0 | 1 | 0 | 0.83 | 0 | 0 | RM 4073       |
| Scan | <i>Procyon lotor</i>                | 0.79 | 0 | 0.92 | 1 | 1.03 | 1 | 1 | 0.9  | 0 | 2 | 1.1  | 0 | 2 | 1 | 0.82 | 0 | 0 | RM 624        |
| Scan | <i>Puma concolor</i>                | 0.52 | 2 | 0.69 | 1 | 0.98 | 1 | 1 | ?    | 0 | 1 | 1.03 | 0 | 1 | 2 | ?    | 0 | 0 | [20]          |
| Scan | <i>Rhampoleon<br/>brevicaudatus</i> | 0.83 | 0 | 0.74 | 2 | 0.99 | 1 | 2 | 1.76 | 3 | 1 | 1.04 | 1 | 2 | 1 | 1.76 | 3 | 0 | RM uncat.     |
| Scan | <i>Tamias minus</i>                 | 0.68 | 0 | 0.96 | 1 | 1.05 | 1 | 1 | 1.17 | 0 | 2 | 1.22 | 0 | 2 | 1 | 0.7  | 0 | 0 | ROM<br>82664  |
| Scan | <i>Tupia ferruginea (gillis)</i>    | 0.64 | 0 | 0.84 | 0 | 0.88 | 1 | 1 | 0.81 | 0 | 0 | 1.08 | 0 | 1 | 2 | 0.61 | 0 | 0 | RM 3053       |
| Terr | <i>Acinonyx jubatus</i>             | 0.57 | 2 | 0.67 | 1 | 1.14 | 1 | 1 | ?    | 0 | 1 | 1.20 | 0 | 0 | 1 | ?    | 0 | 0 | [20]          |
| Terr | <i>Canis familiaris</i>             | 0.72 | 2 | 0.78 | 0 | 1    | 0 | 0 | 0.72 | 0 | 0 | 1.02 | 0 | 0 | 1 | 0.67 | 0 | 0 | Rm 7212       |
| Terr | <i>Cavia porcellus</i>              | 0.45 | 0 | 0.6  | 0 | 0.89 | 0 | 1 | 1.02 | 0 | 0 | 1.03 | 0 | 1 | 1 | 0.59 | 0 | 0 | ROM<br>R525   |
| Terr | <i>Chinchilla sp.</i>               | 0.64 | 0 | 1.04 | 0 | 1.07 | 0 | 1 | 0.95 | 0 | 0 | 1.37 | 0 | 0 | 1 | 0.71 | 0 | 0 | ROM 742       |
| Terr | <i>Dasypsecta sp.</i>               | 0.56 | 2 | 0.71 | 0 | 0.84 | 0 | 0 | 0.71 | 0 | 0 | 1.2  | 0 | 0 | 0 | 0.72 | 0 | 0 | RM 2460       |
| Terr | <i>Dipodomys ordii</i>              | 0.65 | 0 | 1.26 | 0 | 1.2  | 1 | 1 | 0.9  | 0 | 0 | 1.36 | 0 | 0 | 1 | 0.82 | 0 | 0 | ROM<br>91990  |
| Terr | <i>Equus caballus</i>               | 0.48 | 1 | 0.55 | 0 | 1.14 | 0 | 0 | 0.41 | 0 | 0 | 0.93 | 0 | 0 | 0 | 0.41 | 0 | 0 | ROM R<br>929  |
| Terr | <i>Erinaceus europaeus</i>          | 0.62 | 0 | 0.69 | 0 | 0.89 | 1 | 1 | 0.81 | 0 | 0 | 1.2  | 0 | 1 | 1 | 0.74 | 0 | 0 | RM 2503       |
| Terr | <i>Helogale parvula</i>             | 0.52 | 1 | 0.59 | 1 | 0.85 | 1 | 1 | 0.63 | 0 | 1 | 1.03 | 0 | 0 | 1 | 0.55 | 0 | 0 | ROM<br>58388  |
| Terr | <i>Hystrix cristata</i>             | 0.51 | 0 | 0.61 | 0 | 0.77 | 1 | 1 | 0.85 | 1 | 0 | 0.97 | 0 | 1 | 0 | 0.73 | 1 | 0 | RM 2464       |
| Terr | <i>Lepus americanus</i>             | 0.57 | 2 | 0.81 | 0 | 1.01 | 0 | 0 | 1.05 | 0 | 0 | 1.17 | 0 | 0 | 0 | 0.81 | 0 | 0 | RM 5029       |
| Terr | <i>Lynx lynx</i>                    | 0.69 | 2 | 0.89 | 0 | 1.02 | 1 | 1 | 0.84 | 0 | 1 | 1    | 0 | 1 | 2 | 0.76 | 0 | 0 | RM 5070       |
| Terr | <i>Macropus sp</i>                  | 0.45 | 2 | 1    | 0 | 1.11 | 1 | 1 | 0.82 | 0 | 0 | 1.32 | 0 | 0 | 0 | 0.78 | 0 | 0 | RM 3052       |
| Terr | <i>Marmot monax</i>                 | 0.49 | 0 | 0.63 | 1 | 0.76 | 1 | 1 | 1.05 | 0 | 1 | 1.02 | 0 | 1 | 1 | 0.92 | 0 | 0 | RM 620        |
| Terr | <i>Mephitis mephitis</i>            | 0.54 | 0 | 0.68 | 0 | 0.77 | 1 | 1 | 1    | 0 | 0 | 1.02 | 0 | 1 | 1 | 0.69 | 0 | 0 | RM 631        |
| Terr | <i>Metachirus sp.</i>               | 0.59 | 0 | 0.88 | 0 | 1.02 | 0 | 1 | 0.87 | 2 | 0 | 1.09 | 0 | 1 | 0 | 0.72 | 1 | 0 | ROM<br>114155 |
| Terr | <i>Mustela erminea</i>              | 0.42 | 0 | 0.55 | 0 | 0.7  | 1 | 1 | 1.18 | 0 | 0 | 1.08 | 0 | 1 | 2 | 0.73 | 0 | 0 | RM 4043       |
| Terr | <i>Octodon degu</i>                 | 0.48 | 0 | 0.67 | 1 | 0.9  | 1 | 1 | 0.95 | 0 | 0 | 1.14 | 0 | 0 | 1 | 0.78 | 0 | 0 | ROM<br>R4045  |
| Terr | <i>Odocoileus sp.</i>               | 0.53 | 1 | 0.65 | 0 | 0.91 | 0 | 0 | 0.57 | 0 | 0 | 0.77 | 0 | 0 | 0 | 0.53 | 0 | 0 | RM 7211       |
| Terr | <i>Oryctocagus sp.</i>              | 0.48 | 2 | 0.72 | 0 | 0.92 | 0 | 0 | 0.81 | 0 | 0 | 1.17 | 0 | 0 | 0 | 0.8  | 0 | 0 | RM 5031       |
| Terr | <i>Panthera leo</i>                 | 0.55 | 2 | 0.67 | 1 | 0.93 | 1 | 1 | ?    | 0 | 1 | 1.03 | 0 | 1 | 2 | ?    | 0 | 0 | [20]          |

|      |                               |      |   |      |   |      |   |   |      |   |   |      |   |   |   |      |   |   |                    |
|------|-------------------------------|------|---|------|---|------|---|---|------|---|---|------|---|---|---|------|---|---|--------------------|
| Terr | <i>Panthera tigris</i>        | 0.56 | 2 | 0.69 | 1 | 0.92 | 1 | 1 | ?    | 0 | 1 | 1.12 | 0 | 1 | 2 | ?    | 0 | 0 | [20]               |
| Terr | <i>Pecari ta jacu</i>         | 0.34 | 1 | 0.47 | 0 | 0.63 | 0 | 0 | 0.53 | 0 | 0 | 0.95 | 0 | 0 | 0 | 0.47 | 0 | 0 | RM 2461            |
| Terr | <i>Rattus sp.</i>             | 0.46 | 0 | 0.64 | 1 | 0.92 | 1 | 2 | 0.99 | 0 | 1 | 1.11 | 0 | 1 | 1 | 0.43 | 0 | 0 | RM 7213            |
| Terr | <i>Spermophilus franklini</i> | 0.46 | 0 | 0.61 | 1 | 0.9  | 1 | 1 | 0.95 | 0 | 1 | 1.05 | 0 | 1 | 1 | 0.7  | 0 | 0 | Rm 2611            |
| Terr | <i>Sus sp.</i>                | 0.54 | 1 | 0.69 | 0 | 0.77 | 0 | 0 | 1.15 | 0 | 0 | 0.92 | 0 | 0 | 0 | 0.69 | 0 | 0 | RM 6026            |
| Terr | <i>Tapirus sp.</i>            | 0.43 | 1 | 0.58 | 0 | 1.13 | 0 | 0 | 0.67 | 0 | 0 | 1.21 | 0 | 0 | 0 | 0.59 | 0 | 0 | RM 256             |
| Terr | <i>Taxidea taxus</i>          | 0.55 | 0 | 0.54 | 1 | 0.78 | 1 | 1 | 1.27 | 0 | 1 | 0.76 | 0 | 1 | 0 | 0.96 | 0 | 0 | ROM 722            |
| Terr | <i>Urogale everetti</i>       | 0.59 | 0 | 0.78 | 0 | 0.99 | 1 | 1 | 1.11 | 0 | 0 | 1.1  | 0 | 1 | 2 | 0.79 | 0 | 0 | ROM 1183           |
| BB   | <i>Archaeopteryx</i>          | 1.03 | 2 | 1.07 | 1 | 0.87 | 0 | 1 | 1.24 | 1 | 0 | 1.36 | 0 | 0 | 1 | 1.79 | 0 | 0 | [21]               |
| BB   | <i>Archaeopteryx</i>          | 1.05 | 2 | 1.21 | 1 | 0.88 | 0 | 1 | 1.38 | 1 | 0 | 1.43 | 0 | 0 | 1 | 1.67 | 0 | 0 | [21]               |
| BB   | <i>Archaeopteryx</i>          | 1.18 | 2 | 1.29 | 1 | 0.96 | 0 | 1 | 1.24 | 1 | 0 | 1.54 | 0 | 0 | 1 | 1.55 | 0 | 0 | [21]               |
| BB   | <i>Confuciusornis</i>         | ?    | 2 | ?    | ? | ?    | ? | ? | ?    | ? | 0 | 0.49 | 0 | 0 | 1 | 1.67 | 2 | 0 | [7]                |
| BB   | <i>Jeholornis</i>             | ?    | 2 | ?    | ? | ?    | ? | ? | ?    | ? | 0 | 1.1  | 0 | 0 | 1 | 1.65 | 2 | 0 | [7]                |
| BB   | <i>Pengornis</i>              | ?    | 2 | ?    | ? | ?    | ? | ? | ?    | ? | 0 | 0.53 | 0 | 0 | 2 | 1.94 | 2 | 0 | [22]               |
| BB   | <i>Sapeornis</i>              | ?    | 2 | ?    | ? | ?    | ? | ? | ?    | ? | 0 | 1.15 | 0 | 0 | 2 | 1.7  | 2 | 0 | [7]                |
| BB   | <i>Sinornis</i>               | ?    | 2 | ?    | ? | ?    | ? | ? | ?    | ? | 0 | 0.55 | 0 | 0 | 1 | 1.74 | 2 | 0 | [23]               |
| Ther | <i>Allosaurus</i>             | 0.33 | 2 | 0.89 | 1 | 0.85 | 0 | 1 | 1.57 | 1 | 0 | 0.81 | 0 | 0 | 1 | 1.42 | 0 | 0 | [24]               |
| Ther | <i>Anchiornis</i>             | 1.07 | 2 | 1.48 | 1 | 0.8  | 0 | 1 | 1.42 | 1 | 0 | 1.61 | 0 | 0 | 1 | 1.67 | 0 | 0 | [25]               |
| Ther | <i>Bambiraptor</i>            | 0.95 | 2 | 1.38 | 1 | 0.89 | 0 | 1 | 1.18 | 1 | 0 | 1.44 | 0 | 0 | 1 | 1.16 | 0 | 0 | [26]               |
| Ther | <i>Caudipteryx</i>            | 0.45 | 2 | 1.14 | 1 | 0.88 | 0 | 1 | 1.54 | 1 | 0 | 1.26 | 0 | 0 | 0 | 1.3  | 0 | 0 | Pers. com Zhonghe  |
| Ther | <i>Caudipteryx</i>            | 0.51 | 2 | 1.27 | 1 | 0.86 | 0 | 1 | 1.46 | 1 | 0 | 1.3  | 0 | 0 | 0 | 1.42 | 0 | 0 | Pers. com. Zhonghe |
| Ther | <i>Compsognathus</i>          | 0.38 | 2 | 0.86 | 1 | 0.75 | 0 | 1 | 1.27 | 0 | 0 | 1.33 | 0 | 0 | 1 | 1.48 | 0 | 0 | [27], pers. com    |
| Ther | <i>Compsognathus</i>          | 0.36 | 2 | 0.85 | 1 | 0.82 | 0 | 1 | 1.37 | 0 | 0 | 1.21 | 0 | 0 | 1 | 1.48 | 0 | 0 | [27], pers. com    |
| Ther | <i>Dalianraptor</i>           | 0.86 | 2 | 1.03 | 1 | 0.88 | 0 | 1 | 1.74 | 1 | 0 | 1.39 | 0 | 0 | 1 | 1.71 | 0 | 0 | [28]               |
| Ther | <i>Epidendrosaurus</i>        | 0.9  | 2 | 0.94 | 1 | 0.85 | 0 | 1 | 1.51 | 1 | 0 | 1.17 | 0 | 0 | 1 | 1.8  | 0 | 0 | [29]               |
| Ther | <i>Mei long</i>               | 0.69 | 2 | 1.53 | 1 | 1    | 0 | 1 | ?    | 1 | 0 | 1.31 | 0 | 0 | 1 | ?    | 0 | 0 | [30]               |
| Ther | <i>Microraptor gui</i>        | 1.1  | 2 | 1.59 | 1 | 0.84 | 0 | 1 | ?    | 1 | 0 | 1.28 | 0 | 0 | 1 | 1.4  | 0 | 0 | [7] pers. obs.     |
| Ther | <i>Microraptor zhaoianus</i>  | 1.04 | 2 | 1.53 | 1 | 0.85 | 0 | 1 | 0.95 | 1 | 0 | 1.28 | 0 | 0 | 1 | 1.39 | 0 | 0 | [31]               |
| Ther | <i>Sinornithoides</i>         | 0.56 | 2 | 1.28 | 1 | 0.78 | 0 | 1 | 1.4  | 1 | 0 | 1.41 | 0 | 0 | 0 | 1.3  | 0 | 0 | [32]               |
| Ther | <i>Sinornithomimus</i>        | 0.47 | 2 | 0.88 | 1 | 0.69 | 0 | 0 | 1.46 | 1 | 0 | 1.07 | 0 | 0 | 0 | 1.38 | 0 | 0 | [33]               |

|      |                        |      |   |      |   |      |   |   |      |   |   |      |   |   |   |      |   |   |                         |
|------|------------------------|------|---|------|---|------|---|---|------|---|---|------|---|---|---|------|---|---|-------------------------|
| Ther | <i>Sinosauropteryx</i> | 0.28 | 2 | 0.86 | 1 | 0.83 | 0 | 1 | 1.05 | 0 | 0 | 1.18 | 0 | 0 | 1 | 1.38 | 0 | 0 | Pers.<br>com.<br>Currie |
| Ther | <i>Sinosauropteryx</i> | 0.3  | 2 | 0.86 | 1 | 0.79 | 0 | 1 | 0.99 | 0 | 0 | 1.16 | 0 | 0 | 1 | 1.23 | 0 | 0 | Pers. com<br>Currie     |
| Ther | <i>Struthiomimus</i>   | 0.48 | 2 | 0.88 | 1 | 0.79 | 0 | 0 | 1.29 | 1 | 0 | 1.11 | 0 | 0 | 0 | 1.19 | 0 | 0 | [34]                    |
| Ther | <i>Tyrannosaurus</i>   | 0.2  | 2 | 0.86 | 1 | 0.56 | 0 | 1 | 1.15 | 0 | 0 | 0.94 | 0 | 0 | 1 | 1.28 | 0 | 0 | Pers. com<br>Currie     |
