# Supplementary material for: Assessing Arboreal Adaptations of Bird Antecedents: Testing the Ecological Setting of the Origin of the Avian Flight Stroke
Source: PLoS One. 2011 Aug 9;6(8):e22292. doi: 10.1371/journal.pone.0022292 (PMC3153453; doi:10.1371/journal.pone.0022292)
Supplement: Table S2 — Cluster analysis of bird data. A = arboreal forager, BB = basal birds, Bop = bird of prey, C = climbing birds, Claw = Claw geometry (0 = straight, 1 = recurved, 2 = highly recurved), G = ground forager, GB = ground based, Hallux (hallux 0 = non reversed, 1 = reversed but raised, 2 = reversed), Leg L = relative leg length (F+T+Tmt/mass∧0.33), PPI = Pedal phalangeal index (Ph II+III/PhI), TF = tail feathers show adaption for weight supporting adaptation (0 = absent, present = 1), TL = relative tibia length, TMTL = relative tarsometatarsal length, Zy = zygodactyls = (0 = absent, 1 = present). (PDF) [file pone.0022292.s015.pdf]

| category | taxon                             | Leg L | PPI  | TL   | Claw | Hallux | Zy | TF | TMTL |
|----------|-----------------------------------|-------|------|------|------|--------|----|----|------|
| A        | <i>Ara macao</i>                  | 0.18  | 1.96 | 0.78 | 2    | 2      | 1  | 0  | 0.40 |
| A        | <i>Chaetura pelagica</i>          | 0.18  | 4.32 | 0.76 | 2    | 2      | 1  | 1  | 0.54 |
| A        | <i>Opisthocomus hoazin</i>        | 0.23  | 1.97 | 0.91 | 1    | 2      | 0  | 0  | 0.80 |
| A        | <i>Alcedo atthis</i>              | 0.17  | 2.11 | 0.78 | 2    | 2      | 0  | 0  | 0.39 |
| A        | <i>Coccyzus erythrophthalmus</i>  | 0.25  | 2.20 | 1.00 | 1    | 2      | 1  | 0  | 0.91 |
| BOP      | <i>Bubo virginianus</i>           | 0.25  | 2.90 | 1.06 | 2    | 2      | 1  | 0  | 0.79 |
| BOP      | <i>Buteo jamaicensis</i>          | 0.28  | 1.35 | 1.02 | 2    | 2      | 0  | 0  | 1.11 |
| BOP      | <i>Falco sparverius</i>           | 0.25  | 1.48 | 0.95 | 2    | 2      | 0  | 0  | 1.00 |
| BOP      | <i>Strix varia</i>                | 0.27  | 3.37 | 1.12 | 2    | 2      | 1  | 0  | 0.89 |
| C        | <i>Certhia familiaris</i>         | 0.21  | 2.16 | 0.84 | 2    | 2      | 0  | 1  | 0.96 |
| C        | <i>Dryocopus pileatus</i>         | 0.19  | 2.53 | 0.74 | 2    | 2      | 1  | 1  | 0.71 |
| C        | <i>Melanerpes erythrocephalus</i> | 0.23  | 2.18 | 0.91 | 2    | 2      | 1  | 1  | 0.86 |
| C        | <i>Sitta europaea</i>             | 0.22  | 2.29 | 0.87 | 2    | 2      | 0  | 0  | 0.89 |
| G        | <i>Cinclus cinclus</i>            | 0.24  | 1.90 | 1.01 | 2    | 1      | 0  | 0  | 1.01 |
| G        | <i>Columba livia</i>              | 0.19  | 1.45 | 0.78 | 1    | 2      | 0  | 0  | 0.61 |
| G        | <i>Corvus corax</i>               | 0.25  | 2.11 | 1.04 | 2    | 2      | 0  | 0  | 0.92 |
| G        | <i>Corvus frugilegus</i>          | 0.25  | 1.97 | 1.05 | 1    | 2      | 0  | 0  | 0.96 |
| G        | <i>Crotophaga ani</i>             | 0.21  | 1.70 | 0.85 | 1    | 2      | 1  | 0  | 0.84 |
| G        | <i>Geococcyx sp.</i>              | 0.28  | 1.63 | 1.10 | 1    | 2      | 1  | 0  | 1.15 |
| G        | <i>Goura cristata</i>             | 0.23  | 1.35 | 0.92 | 1    | 2      | 0  | 0  | 0.97 |
| G        | <i>Melanocorypha calandra</i>     | 0.25  | 1.43 | 0.87 | 1    | 2      | 0  | 0  | 1.25 |
| G        | <i>Pica pica</i>                  | 0.26  | 1.93 | 1.05 | 1    | 2      | 0  | 0  | 1.08 |
| G        | <i>Sturnus vulgaris</i>           | 0.23  | 1.88 | 0.97 | 1    | 2      | 0  | 0  | 0.91 |
| G        | <i>Turdus philomelos</i>          | 0.25  | 2.28 | 1.03 | 1    | 2      | 0  | 0  | 1.04 |
| GB       | <i>Alectoris rufa</i>             | 0.21  | 1.52 | 0.85 | 1    | 1      | 0  | 0  | 0.68 |
| GB       | <i>Anhima cornuta</i>             | 0.28  | 1.59 | 1.18 | 1    | 1      | 0  | 0  | 1.15 |
| GB       | <i>Cariama cristata</i>           | 0.43  | 1.05 | 1.71 | 1    | 0      | 0  | 0  | 2.30 |
| GB       | <i>Dromaius novaehollandiae</i>   | 0.30  | 1.00 | 1.14 | 0    | 0      | 0  | 0  | 1.49 |

|      |                              |      |      |      |   |   |   |   |      |
|------|------------------------------|------|------|------|---|---|---|---|------|
| GB   | <i>Gallus gallus</i>         | 0.31 | 1.42 | 1.20 | 1 | 1 | 0 | 0 | 1.26 |
| GB   | <i>Meleagris gallopavo</i>   | 0.27 | 1.54 | 1.09 | 1 | 1 | 0 | 0 | 1.13 |
| GB   | <i>Rhea sp.</i>              | 0.29 | 0.90 | 1.04 | 0 | 0 | 0 | 0 | 1.46 |
| GB   | <i>Struthio camelus</i>      | 0.27 | 0.93 | 1.04 | 0 | 0 | 0 | 0 | 1.34 |
| BB   | <i>Confuciusornis</i>        | 0.21 | 1.67 | 0.87 | 1 | 2 | 0 | 0 | 0.73 |
| BB   | <i>Jeholornis</i>            | 0.26 | 1.65 | 1.07 | 1 | 2 | 0 | 0 | 0.96 |
| BB   | <i>Pengornis</i>             | 0.23 | 1.94 | 0.88 | 1 | 2 | 0 | 0 | 0.82 |
| BB   | <i>Sapeornis</i>             | 0.23 | 1.70 | 0.87 | 2 | 2 | 0 | 0 | 0.83 |
| BB   | <i>Sinornis</i>              | 0.28 | 1.74 | 1.13 | 1 | 2 | 0 | 0 | 1.11 |
| BB   | <i>Archaeopteryx</i>         | 0.29 | 1.79 | 1.19 | 1 | 0 | 0 | 0 | 1.10 |
| BB   | <i>Archaeopteryx</i>         | 0.30 | 1.67 | 1.26 | 1 | 0 | 0 | 0 | 1.28 |
| BB   | <i>Archaeopteryx</i>         | 0.33 | 1.55 | 1.37 | 1 | 0 | 0 | 0 | 1.38 |
| Ther | <i>Anchiornis</i>            | 0.31 | 1.67 | 1.36 | 1 | 0 | 0 | 0 | 1.25 |
| Ther | <i>Bambiraptor</i>           | 0.27 | 1.16 | 1.19 | 1 | 0 | 0 | 0 | 1.00 |
| Ther | <i>Caudipteryx</i>           | 0.26 | 1.30 | 1.04 | 0 | 0 | 0 | 0 | 1.12 |
| Ther | <i>Caudipteryx</i>           | 0.27 | 1.42 | 1.07 | 0 | 0 | 0 | 0 | 1.13 |
| Ther | <i>Compsognathus</i>         | 0.26 | 1.49 | 0.67 | 1 | 0 | 0 | 0 | 0.76 |
| Ther | <i>Dalianraptor</i>          | 0.31 | 1.71 | 1.23 | 1 | 0 | 0 | 0 | 1.38 |
| Ther | <i>Mei_long</i>              | 0.33 | 1.28 | 1.38 | 1 | 0 | 0 | 0 | 1.32 |
| Ther | <i>Microraptor gui</i>       | 0.32 | 1.40 | 1.28 | 1 | 0 | 0 | 0 | 1.28 |
| Ther | <i>Microraptor zhaoianus</i> | 0.33 | 1.39 | 1.33 | 1 | 0 | 0 | 0 | 1.21 |
| Ther | <i>Sinornithoides</i>        | 0.27 | 1.30 | 1.11 | 1 | 0 | 0 | 0 | 1.15 |
| Ther | <i>Sinosauropteryx</i>       | 0.16 | 1.23 | 0.95 | 1 | 0 | 0 | 0 | 1.11 |
| Ther | <i>Struthiomimus</i>         | 0.27 | 1.40 | 0.99 | 0 | 0 | 0 | 0 | 1.19 |
