# Supplementary material for: Assessing Arboreal Adaptations of Bird Antecedents: Testing the Ecological Setting of the Origin of the Avian Flight Stroke
Source: PLoS One. 2011 Aug 9;6(8):e22292. doi: 10.1371/journal.pone.0022292 (PMC3153453; doi:10.1371/journal.pone.0022292)
Supplement: Table S4 — PCO loadings for first 3 axes for total dataset using hindlimb characters only. Percentage of variance explained by the first three axes for Euclidean setting: 42.6, 25.3 and 12.6%. For Correlation setting: 40.5, 18.0 and 8.0%. All other axes explain less than 5% of the variance. (PDF) [file pone.0022292.s017.pdf]

| category | taxon                               | Euclidean |          |          |  | Correlation |          |          |
|----------|-------------------------------------|-----------|----------|----------|--|-------------|----------|----------|
|          |                                     | axis 1    | axis 2   | axis 3   |  | axis 1      | axis 2   | axis 3   |
| A        | <i>Aotus trivirgatus</i>            | 1.8378    | -0.36511 | 1.6728   |  | 0.62904     | 0.36479  | 0.39572  |
| A        | <i>Arctictis binturong</i>          | 1.9109    | 0.69406  | -1.1535  |  | 0.81128     | -0.58338 | -0.12537 |
| A        | <i>Bradypus tridactylus</i>         | 1.5113    | 0.36734  | -1.2735  |  | 0.39488     | -0.26051 | -0.06572 |
| A        | <i>Callithrix jacchus</i>           | 2.1645    | -0.71307 | -0.00891 |  | 0.6688      | 0.14472  | -0.16971 |
| A        | <i>Caluromys lanatus</i>            | 2.5578    | -1.2679  | -0.1342  |  | 1.1006      | 0.28817  | -0.30836 |
| A        | <i>Cebuella pygmea</i>              | 2.3013    | -1.073   | -0.40804 |  | 0.65523     | 0.16807  | -0.1937  |
| A        | <i>Cercopithecus cephus</i>         | 1.8134    | -0.46857 | 1.6111   |  | 0.59959     | 0.37482  | 0.38361  |
| A        | <i>Chamaeleo calyptratus</i>        | 2.0721    | -1.7355  | 1.2371   |  | 0.80688     | 0.87296  | -0.05516 |
| A        | <i>Daubentonina madagascarensis</i> | 2.2668    | -1.0066  | -0.23969 |  | 0.7444      | 0.19448  | -0.22068 |
| A        | <i>Dendrolagus insutus</i>          | 1.0717    | 0.86498  | -0.59773 |  | 0.47172     | -0.45717 | -0.28572 |
| A        | <i>Erthizon dorsatum</i>            | 1.8392    | -0.80929 | -0.09381 |  | 0.69268     | 0.23122  | -0.31633 |
| A        | <i>Galaucomys sabrinus</i>          | 2.1526    | 1.0908   | -0.7324  |  | 0.72277     | -0.5287  | 0.095684 |
| A        | <i>Galaucomys volans</i>            | 2.1378    | 1.016    | -0.76514 |  | 0.71548     | -0.50558 | 0.072266 |
| A        | <i>Gymnobleleus leadbeateri</i>     | 2.0862    | -1.0353  | -0.22704 |  | 0.57839     | 0.17236  | -0.15549 |
| A        | <i>Lagothrix sp.</i>                | 2.1052    | -0.73493 | 1.7164   |  | 0.7534      | 0.5076   | 0.49114  |
| A        | <i>Lemur fulvus</i>                 | 1.7873    | -0.57762 | 1.5355   |  | 0.56582     | 0.38328  | 0.37184  |
| A        | <i>Leontopithecus sp.</i>           | 2.1508    | -0.77435 | -0.04069 |  | 0.65773     | 0.15388  | -0.17522 |
| A        | <i>Loris tardigradus</i>            | 1.9469    | -0.61425 | 1.4555   |  | 0.66928     | 0.42186  | 0.46427  |
| A        | <i>Manis tetradactyla</i>           | 1.7974    | 0.7562   | -0.56849 |  | 0.68843     | -0.42659 | -0.13309 |
| A        | <i>Otolemur sp.</i>                 | 1.5992    | -0.64673 | 1.4222   |  | 0.69316     | 0.5285   | 0.41971  |
| A        | <i>Perodicticus potto</i>           | 1.929     | -0.68706 | 1.3965   |  | 0.63891     | 0.42668  | 0.45507  |
| A        | <i>Petaurista grandis</i>           | 2.1357    | 0.99784  | -0.77023 |  | 0.72042     | -0.49562 | 0.056332 |
| A        | <i>Potos flavus</i>                 | 2.2736    | -0.74104 | 1.6621   |  | 0.95058     | 0.5803   | 0.62229  |
| A        | <i>Saguinus sp.</i>                 | 2.1589    | -0.74265 | -0.02173 |  | 0.66735     | 0.15226  | -0.17804 |
| A        | <i>Saimiri sciureus</i>             | 2.149     | -0.78195 | -0.04507 |  | 0.65587     | 0.15467  | -0.17523 |
| A        | <i>Scurius carolinesis</i>          | 2.1424    | 1.0378   | -0.75475 |  | 0.71914     | -0.51197 | 0.07737  |
| A        | <i>Tarsius spectrum</i>             | 1.3369    | -1.3134  | -0.41943 |  | 0.46502     | 0.32649  | -0.40807 |
| A-Fossil | <i>Megalanacosaurus</i>             | 2.4629    | -1.6962  | -0.49294 |  | 0.84754     | 0.37766  | -0.29016 |
| A-Fossil | <i>Vallesaurus</i>                  | 2.5687    | -2.0499  | -0.80808 |  | 0.8199      | 0.41697  | -0.22228 |
| A-Fossil | <i>Sumina</i>                       | 1.734     | -1.0869  | 0.76274  |  | 0.8375      | 0.65167  | 0.012737 |
| B-A      | <i>Alcedo atthis</i>                | -1.2447   | -1.63    | -0.6385  |  | -0.3414     | 0.27529  | -0.31528 |
| B-A      | <i>Ara severus</i>                  | -1.1405   | -2.451   | -0.22245 |  | -0.28121    | 0.48103  | -0.27565 |
| B-A      | <i>Chaetura pelagica</i>            | -1.4333   | -2.3303  | -1.696   |  | -0.27989    | 0.24631  | -0.16929 |
| B-A      | <i>Coccyzus erythrophthalmus</i>    | -1.1606   | -2.5     | -0.30506 |  | -0.29016    | 0.45772  | -0.24003 |
| B-A      | <i>Opisthocomus hoazin</i>          | -1.2313   | -1.5461  | -0.58955 |  | -0.35682    | 0.25735  | -0.30296 |
| B-C      | <i>Certhia familiaris</i>           | -1.2474   | -1.5882  | -0.65412 |  | -0.35801    | 0.24247  | -0.27186 |
| B-C      | <i>Dryocopus pileatus</i>           | -1.0764   | -2.8784  | -0.54396 |  | -0.32441    | 0.53271  | -0.26598 |
| B-C      | <i>Melanerpes erythrocephalus</i>   | -1.0146   | -2.6384  | -0.25974 |  | -0.34025    | 0.56389  | -0.31751 |
| B-C      | <i>Sitta europaea</i>               | -1.2592   | -1.6454  | -0.7022  |  | -0.35079    | 0.24808  | -0.27081 |
| B-G      | <i>Cinclus cinclus</i>              | -1.3825   | -1.3125  | 0.27845  |  | -0.45388    | 0.44524  | -0.04893 |
| B-G      | <i>Columba livia</i>                | -1.343    | -1.1691  | 0.41337  |  | -0.46992    | 0.47584  | -0.08372 |

|      |                                 |          |          |          |          |          |          |
|------|---------------------------------|----------|----------|----------|----------|----------|----------|
| B-G  | <i>Corvus corax</i>             | -1.2437  | -1.5943  | -0.63759 | -0.35311 | 0.25562  | -0.29172 |
| B-G  | <i>Corvus frugilegus</i>        | -1.3887  | -1.3444  | 0.25578  | -0.44808 | 0.44765  | -0.05171 |
| B-G  | <i>Crotophaga ani</i>           | -1.2734  | -2.1156  | 0.70756  | -0.3707  | 0.65139  | -0.03958 |
| B-G  | <i>Geococcyx sp.</i>            | -1.2683  | -2.0889  | 0.72456  | -0.37351 | 0.64988  | -0.037   |
| B-G  | <i>Goura cristata</i>           | -1.3333  | -1.107   | 0.44142  | -0.48141 | 0.46126  | -0.06831 |
| B-G  | <i>Melanocorypha calandra</i>   | -1.34    | -1.1035  | 0.42136  | -0.48433 | 0.43298  | -0.03808 |
| B-G  | <i>Pica pica</i>                | -1.3853  | -1.3215  | 0.26786  | -0.45279 | 0.44225  | -0.04574 |
| B-G  | <i>Sturnus vulgaris</i>         | -1.3809  | -1.3106  | 0.28473  | -0.45355 | 0.44946  | -0.05351 |
| B-G  | <i>Turdus philomelos</i>        | -1.4162  | -1.446   | 0.1449   | -0.43283 | 0.42931  | -0.0331  |
| B-GB | <i>Alectornis sp.</i>           | -1.4423  | -0.31882 | 0.043681 | -0.55159 | 0.16972  | -0.12326 |
| B-GB | <i>Anhima cornuta</i>           | -1.6079  | -0.13123 | 0.88293  | -0.62317 | 0.39032  | 0.24858  |
| B-GB | <i>Cariama cristata</i>         | -1.4939  | 0.78012  | -0.16869 | -0.60803 | -0.24758 | -0.12178 |
| B-GB | <i>Dromaius novaehollandiae</i> | -1.6492  | 0.99375  | 0.70124  | -0.68921 | -0.04397 | 0.28209  |
| B-GB | <i>Gallus gallus</i>            | -1.5934  | -0.06595 | 0.92847  | -0.6402  | 0.3902   | 0.25577  |
| B-GB | <i>Meleagris gallopavo</i>      | -1.4431  | -0.30207 | 0.040202 | -0.55457 | 0.15325  | -0.1037  |
| B-GB | <i>Rhea sp.</i>                 | -1.64    | 1.041    | 0.72376  | -0.69247 | -0.05752 | 0.29296  |
| B-GB | <i>Struthio camelus</i>         | -1.6429  | 1.019    | 0.71654  | -0.69554 | -0.04741 | 0.28356  |
| BOP  | <i>Bubo virginianus</i>         | -1.3129  | -1.8781  | -0.95169 | -0.32386 | 0.25646  | -0.24477 |
| BOP  | <i>Buteo jamaicensis</i>        | -1.1756  | -1.3012  | -0.4027  | -0.3766  | 0.24949  | -0.33252 |
| BOP  | <i>Falco sparverius</i>         | -1.1873  | -1.3531  | -0.43823 | -0.37334 | 0.25126  | -0.32683 |
| BOP  | <i>Strix varia</i>              | -1.3505  | -2.0183  | -1.1574  | -0.31065 | 0.25115  | -0.21554 |
| Liz  | <i>Anolis sp.</i>               | 1.5909   | 0.69986  | -0.95484 | 0.50576  | -0.37024 | -0.06997 |
| Liz  | <i>Crotaphytus collaris</i>     | 1.6739   | 1.0453   | -0.72646 | 0.63316  | -0.47841 | -0.06919 |
| Liz  | <i>Draco sp.</i>                | 1.5606   | 0.53794  | -1.0632  | 0.48141  | -0.29847 | -0.11724 |
| Liz  | <i>Lacerta agilis</i>           | 1.5429   | 0.4635   | -1.1334  | 0.45544  | -0.2744  | -0.11389 |
| Liz  | <i>Phrynosoma solare</i>        | 1.633    | 0.87309  | -0.82607 | 0.57385  | -0.42705 | -0.0744  |
| Liz  | <i>Varanus niloticus</i>        | 1.6504   | 0.91943  | -0.78097 | 0.62145  | -0.4256  | -0.11971 |
| Liz  | <i>Xuanlong zhaoi</i>           | 1.5477   | 0.4995   | -1.1146  | 0.45381  | -0.29369 | -0.0945  |
| Scan | <i>Aliurus filgens</i>          | 1.9524   | 0.92719  | -0.75168 | 0.59231  | -0.36787 | 0.010904 |
| Scan | <i>Chlorocebus pygerythrus</i>  | 1.8087   | -0.49256 | 1.5984   | 0.59676  | 0.3812   | 0.37638  |
| Scan | <i>Didelphis sp.</i>            | 2.1276   | -1.0801  | 0.002428 | 0.96232  | 0.34331  | -0.40817 |
| Scan | <i>Felis catus</i>              | -0.25107 | 0.76092  | -1.0264  | -0.21281 | -0.4658  | -0.13007 |
| Scan | <i>Genetta genetta</i>          | 0.35283  | 0.93809  | -0.81049 | 0.064668 | -0.47459 | -0.19903 |
| Scan | <i>Gulo gulo</i>                | 0.92234  | 0.85472  | -1.0513  | 0.41429  | -0.40549 | -0.25285 |
| Scan | <i>Lemur catta</i>              | 1.3596   | -0.38653 | 1.6792   | 0.53506  | 0.46679  | 0.31856  |
| Scan | <i>Leopardus pardal</i>         | -0.41005 | 0.49715  | -1.5004  | -0.23276 | -0.44737 | -0.14839 |
| Scan | <i>Leptailurus serval</i>       | -0.40983 | 0.50603  | -1.4996  | -0.23489 | -0.4513  | -0.13888 |
| Scan | <i>Marmosa mexicana</i>         | 1.3597   | -1.2019  | 0.032443 | 0.50127  | 0.39784  | -0.41324 |
| Scan | <i>Martes americana</i>         | 2.1515   | 1.0764   | -0.73535 | 0.72966  | -0.52039 | 0.079958 |
| Scan | <i>Martes pennanti</i>          | 2.1404   | 1.0223   | -0.75952 | 0.72251  | -0.50424 | 0.065263 |
| Scan | <i>Monodelphis sp.</i>          | 1.9681   | -1.0413  | 0.078823 | 0.73122  | 0.2926   | -0.31466 |
| Scan | <i>Nasua narica</i>             | 1.8165   | 1.2153   | 0.14465  | 0.67332  | -0.37739 | 0.33681  |
| Scan | <i>Panthera pardus</i>          | -0.40935 | 0.52678  | -1.4977  | -0.23909 | -0.45932 | -0.11663 |

|      |                                     |          |          |          |  |          |          |          |
|------|-------------------------------------|----------|----------|----------|--|----------|----------|----------|
| Scan | <i>Papio papio</i>                  | 0.79071  | -0.39039 | 1.735    |  | 0.38977  | 0.64173  | 0.29599  |
| Scan | <i>Procapra capensis</i>            | 0.13587  | 1.4024   | 1.1026   |  | 0.24415  | -0.16248 | 0.50862  |
| Scan | <i>Procyon lotor</i>                | 1.8169   | 1.2325   | 0.1461   |  | 0.66027  | -0.38986 | 0.35823  |
| Scan | <i>Puma concolor</i>                | -0.40994 | 0.50159  | -1.5     |  | -0.23385 | -0.44937 | -0.14364 |
| Scan | <i>Rhynchophloeus brevicaudatus</i> | 1.7046   | -1.7532  | 0.91284  |  | 0.52331  | 0.61299  | -0.00434 |
| Scan | <i>Tamias minus</i>                 | 1.8281   | 1.2945   | 0.17122  |  | 0.66198  | -0.41186 | 0.38347  |
| Scan | <i>Tupia ferruginea (gillis)</i>    | 0.4737   | 1.1076   | -0.55698 |  | 0.24165  | -0.34803 | -0.33551 |
| Terr | <i>Acinonyx jubatus</i>             | -1.2312  | 0.72187  | -0.50082 |  | -0.50743 | -0.34435 | 0.10139  |
| Terr | <i>Canis familiaris</i>             | -1.4592  | 0.93603  | -0.08886 |  | -0.62288 | -0.28244 | -0.11898 |
| Terr | <i>Cavia porcellus</i>              | 0.31774  | 1.3069   | 0.29034  |  | 0.27543  | -0.33481 | -0.0023  |
| Terr | <i>Chinchilla sp.</i>               | -0.26877 | 1.279    | 0.33016  |  | -0.02916 | -0.28664 | -0.0972  |
| Terr | <i>Dasyprocta sp.</i>               | -1.623   | 1.1377   | 0.76267  |  | -0.68494 | -0.08949 | 0.32181  |
| Terr | <i>Dipodomys ordii</i>              | -0.27882 | 1.2354   | 0.30833  |  | -0.0353  | -0.27071 | -0.09692 |
| Terr | <i>Equus caballus</i>               | -0.99773 | 1.3796   | 1.0172   |  | -0.60801 | -0.13021 | 0.37383  |
| Terr | <i>Erinaceus europaeus</i>          | 0.3045   | 1.2712   | 0.26462  |  | 0.23547  | -0.32116 | 0.038622 |
| Terr | <i>Helogale parvula</i>             | -0.3766  | 1.1308   | 0.09962  |  | -0.24332 | -0.41981 | 0.043656 |
| Terr | <i>Hystrix cristata</i>             | 0.24022  | 0.56828  | 1.4583   |  | 0.26883  | 0.38911  | 0.34059  |
| Terr | <i>Lepus americanus</i>             | -1.6313  | 1.0991   | 0.74454  |  | -0.68338 | -0.08071 | 0.31483  |
| Terr | <i>Lynx lynx</i>                    | -0.25948 | 0.71696  | -1.0444  |  | -0.21422 | -0.455   | -0.14123 |
| Terr | <i>Macropus sp</i>                  | -1.6282  | 1.1304   | 0.75269  |  | -0.67014 | -0.09574 | 0.33063  |
| Terr | <i>Marmota monax</i>                | 0.76154  | 1.1688   | 0.18914  |  | 0.42849  | -0.3657  | 0.15212  |
| Terr | <i>Mephitis mephitis</i>            | 0.30858  | 1.2668   | 0.27198  |  | 0.26231  | -0.31748 | -0.00652 |
| Terr | <i>Metachirus sp.</i>               | 0.24147  | 0.58794  | 1.4616   |  | 0.25423  | 0.35736  | 0.36212  |
| Terr | <i>Mustela erminea</i>              | 0.46274  | 1.0612   | -0.5793  |  | 0.23059  | -0.33618 | -0.33132 |
| Terr | <i>Octodon degu</i>                 | -0.2757  | 1.2218   | 0.31323  |  | -0.02926 | -0.27259 | -0.16826 |
| Terr | <i>Odontomys sp.</i>                | -1.0093  | 1.3114   | 0.99624  |  | -0.63308 | -0.09361 | 0.33717  |
| Terr | <i>Oryzomys sp.</i>                 | -1.6304  | 1.103    | 0.74656  |  | -0.68392 | -0.08138 | 0.31526  |
| Terr | <i>Panthera leo</i>                 | -0.40994 | 0.50159  | -1.5     |  | -0.23385 | -0.44937 | -0.14364 |
| Terr | <i>Panthera tigris</i>              | -0.40962 | 0.51492  | -1.4988  |  | -0.23682 | -0.45493 | -0.12935 |
| Terr | <i>Pecari ta jacu</i>               | -1.0032  | 1.3587   | 1.0078   |  | -0.59996 | -0.12449 | 0.37082  |
| Terr | <i>Rattus sp.</i>                   | 0.80654  | 1.3703   | 0.28162  |  | 0.50164  | -0.45585 | 0.20154  |
| Terr | <i>Spermophilus franklini</i>       | 0.78165  | 1.2572   | 0.23394  |  | 0.46488  | -0.40719 | 0.1709   |
| Terr | <i>Sus sp.</i>                      | -1.0234  | 1.269    | 0.96884  |  | -0.58531 | -0.09206 | 0.34597  |
| Terr | <i>Tapirus sp.</i>                  | -1.0135  | 1.346    | 0.99047  |  | -0.53752 | -0.13387 | 0.39231  |
| Terr | <i>Taxidea taxus</i>                | 0.59733  | 1.3167   | 1.0369   |  | 0.45994  | -0.22799 | 0.62953  |
| Terr | <i>Urogalearia everetti</i>         | 0.45733  | 1.0407   | -0.59084 |  | 0.22363  | -0.33145 | -0.32413 |
| BB   | <i>Archaeopteryx</i>                | -1.5592  | 0.56238  | -0.36477 |  | -0.5376  | -0.20452 | -0.03389 |
| BB   | <i>Archaeopteryx</i>                | -1.5484  | 0.61495  | -0.32668 |  | -0.54397 | -0.21758 | -0.02947 |
| BB   | <i>Archaeopteryx</i>                | -1.5375  | 0.67311  | -0.28944 |  | -0.54719 | -0.23172 | -0.01883 |
| BB   | <i>Confuciusornis</i>               | -1.3629  | -1.2574  | 0.34971  |  | -0.45716 | 0.47257  | -0.07938 |
| BB   | <i>Jeholornis</i>                   | -1.3591  | -1.1697  | 0.36041  |  | -0.47586 | 0.41707  | -0.02064 |
| BB   | <i>Pengornis</i>                    | -1.229   | -1.5473  | -0.57994 |  | -0.35388 | 0.26429  | -0.31345 |
| BB   | <i>Sapeornis</i>                    | -1.2057  | -1.3794  | -0.49838 |  | -0.38065 | 0.21946  | -0.26917 |

|      |                              |         |         |          |  |          |          |          |
|------|------------------------------|---------|---------|----------|--|----------|----------|----------|
| BB   | <i>Sinornis</i>              | -1.3689 | -1.2748 | 0.32858  |  | -0.45644 | 0.46455  | -0.07021 |
| Ther | <i>Allosaurus</i>            | -1.5277 | 0.62481 | -0.2627  |  | -0.58173 | -0.20612 | -0.12114 |
| Ther | <i>Anchiornis</i>            | -1.548  | 0.63859 | -0.32341 |  | -0.53543 | -0.22382 | -0.00658 |
| Ther | <i>Bambiraptor</i>           | -1.5026 | 0.80448 | -0.18795 |  | -0.57732 | -0.26169 | -0.04238 |
| Ther | <i>Caudipteryx</i>           | -1.6754 | 0.92586 | 0.63294  |  | -0.64021 | -0.05615 | 0.30331  |
| Ther | <i>Caudipteryx</i>           | -1.6861 | 0.88667 | 0.60168  |  | -0.62688 | -0.05186 | 0.30233  |
| Ther | <i>Compsognathus</i>         | -1.5316 | 0.67119 | -0.27318 |  | -0.56242 | -0.23006 | -0.04917 |
| Ther | <i>Compsognathus</i>         | -1.5319 | 0.6554  | -0.27492 |  | -0.56737 | -0.22472 | -0.06538 |
| Ther | <i>Dalianraptor</i>          | -1.552  | 0.5952  | -0.33947 |  | -0.54263 | -0.21258 | -0.03313 |
| Ther | <i>Epidendrosaurus</i>       | -1.5605 | 0.5338  | -0.37068 |  | -0.54261 | -0.19478 | -0.0564  |
| Ther | <i>Mei long</i>              | -1.7624 | 0.74989 | -0.4663  |  | -0.62784 | -0.30399 | -0.07155 |
| Ther | <i>Microraptor gui</i>       | -1.5237 | 0.69778 | -0.24927 |  | -0.57122 | -0.23584 | -0.05923 |
| Ther | <i>Microraptor zhaoianus</i> | -1.5246 | 0.69409 | -0.25196 |  | -0.5705  | -0.23497 | -0.05888 |
| Ther | <i>Sinornithoides</i>        | -1.6751 | 0.94558 | 0.63526  |  | -0.62852 | -0.06809 | 0.3161   |
| Ther | <i>Sinornithomimus</i>       | -1.6831 | 0.87119 | 0.60941  |  | -0.64518 | -0.03477 | 0.28371  |
| Ther | <i>Sinosauropteryx</i>       | -1.523  | 0.68833 | -0.24799 |  | -0.57616 | -0.23213 | -0.07354 |
| Ther | <i>Sinosauropteryx</i>       | -1.5096 | 0.74145 | -0.20939 |  | -0.58785 | -0.24437 | -0.08216 |
| Ther | <i>Struthiomimus</i>         | -1.6659 | 0.94717 | 0.65867  |  | -0.66047 | -0.05016 | 0.29385  |
| Ther | <i>Tyrannosaurus</i>         | -1.5147 | 0.69384 | -0.22456 |  | -0.59137 | -0.2275  | -0.11141 |
