# Supplementary material for: Assessing Arboreal Adaptations of Bird Antecedents: Testing the Ecological Setting of the Origin of the Avian Flight Stroke
Source: PLoS One. 2011 Aug 9;6(8):e22292. doi: 10.1371/journal.pone.0022292 (PMC3153453; doi:10.1371/journal.pone.0022292)
Supplement: Table S5 — PCO loadings for first axes for the quadrupedal only dataset. Percentage of variance explained by the first four axes for Euclidean setting: 47.2, 16.9, 10.2 and 5.2% For Correlation setting the first three axes explained: 39.0, 16.1 and 4.9%. All other axes explain less than 5% of the variance. (PDF) [file pone.0022292.s018.pdf]

| category | taxon                                   | Euclidean |          |          |          |  | correlation |          |          |
|----------|-----------------------------------------|-----------|----------|----------|----------|--|-------------|----------|----------|
|          |                                         | axis 1    | axis 2   | axis 3   | axis 4   |  | axis 1      | axis 2   | axis 3   |
| A        | <i>Aotus trivirgatus</i>                | 2.3589    | -1.4749  | 0.58659  | -1.0127  |  | 0.56644     | 0.38237  | -0.1306  |
| A        | <i>Arctictis binturong</i>              | 0.90391   | 1.515    | 0.066615 | 0.64325  |  | 0.37778     | -0.50983 | -0.09966 |
| A        | <i>Bradypus tridactylus</i>             | 1.2861    | 1.6036   | -1.2543  | -0.65386 |  | 0.16863     | -0.19507 | -0.17858 |
| A        | <i>Callithrix jacchus</i>               | 2.3307    | 0.17948  | 0.038912 | -0.14499 |  | 0.56987     | -0.10369 | -0.07753 |
| A        | <i>Caluromys lanatus</i>                | 3.1323    | -0.46388 | -0.39621 | 1.3579   |  | 0.91358     | 0.005821 | -0.05962 |
| A        | <i>Cebuella pygmaea</i>                 | 2.6388    | 0.42828  | -0.39363 | -0.28835 |  | 0.57658     | -0.11185 | -0.08332 |
| A        | <i>Cercopithecus cephus</i>             | 2.3809    | -1.4946  | 0.4833   | -1.0167  |  | 0.55021     | 0.39396  | -0.13202 |
| A        | <i>Chamaeleo calypttratus</i>           | 3.1677    | -2.0946  | 0.47009  | 1.6119   |  | 0.84296     | 0.57224  | 0.10708  |
| A        | <i>Daubentonina<br/>madagascarensis</i> | 3.0554    | -0.12682 | -1.4017  | -0.55719 |  | 0.50166     | 0.1228   | -0.1074  |
| A        | <i>Dendrolagus insutus</i>              | 0.57244   | 0.51428  | 0.010662 | 0.69385  |  | 0.24941     | -0.2159  | -0.14232 |
| A        | <i>Erthizon dorsatum</i>                | 1.5093    | 0.16843  | 0.46666  | 0.53163  |  | 0.63577     | -0.13614 | 0.24932  |
| A        | <i>Galaucomys sabrinus</i>              | 1.6677    | 1.096    | -0.1197  | -0.67483 |  | 0.39414     | -0.26271 | -0.18547 |
| A        | <i>Galaucomys volans</i>                | 1.7168    | 1.0941   | -0.26514 | -0.72078 |  | 0.383       | -0.24334 | -0.20132 |
| A        | <i>Gymnobleleus leadbeateri</i>         | 2.7192    | -0.38638 | -0.49273 | -0.16373 |  | 0.52619     | 0.070613 | -0.11122 |
| A        | <i>Lagothrix sp.</i>                    | 2.6857    | -1.6917  | 0.46427  | 0.44627  |  | 0.70932     | 0.50649  | -0.00456 |
| A        | <i>Lemur fulvus</i>                     | 2.4048    | -1.5429  | 0.32486  | -1.049   |  | 0.51399     | 0.4185   | -0.11809 |
| A        | <i>Leontopithecus sp.</i>               | 2.3492    | 0.17322  | -0.02632 | -0.15063 |  | 0.56301     | -0.09681 | -0.08457 |
| A        | <i>Loris tardigradus</i>                | 2.5737    | -1.4626  | 0.18412  | -1.0912  |  | 0.60184     | 0.45695  | -0.13436 |
| A        | <i>Manis tetradactyla</i>               | 0.57649   | 1.3535   | 0.62628  | 1.5143   |  | 0.35485     | -0.48034 | 0.16665  |
| A        | <i>Otolemur sp.</i>                     | 2.2874    | -1.542   | 0.23978  | -0.8545  |  | 0.56188     | 0.52068  | -0.02536 |
| A        | <i>Perodicticus potto</i>               | 2.554     | -1.4267  | 0.21184  | -1.0162  |  | 0.6168      | 0.43917  | -0.17659 |
| A        | <i>Petaurista grandis</i>               | 1.7134    | 1.134    | -0.22164 | -0.68094 |  | 0.41218     | -0.25012 | -0.23078 |
| A        | <i>Potos flavus</i>                     | 2.7991    | -1.5617  | 0.52034  | 0.50932  |  | 0.8781      | 0.50617  | -0.06128 |
| A        | <i>Saguinus sp.</i>                     | 2.3347    | 0.17769  | 0.02904  | -0.1385  |  | 0.57297     | -0.1039  | -0.08433 |
| A        | <i>Saimiri sciureus</i>                 | 2.3477    | 0.16925  | -0.0231  | -0.14677 |  | 0.56221     | -0.09762 | -0.08028 |
| A        | <i>Scurius carolinensis</i>             | 1.3669    | 1.2439   | 0.23124  | -0.43954 |  | 0.41601     | -0.3134  | -0.04019 |
| A        | <i>Tarsius spectrum</i>                 | 2.3508    | -0.84167 | -1.616   | 0.57241  |  | 0.31197     | 0.28635  | -0.01651 |
| A-Fossil | <i>Megalancosaurus</i>                  | 3.5287    | -0.96084 | -0.99733 | 1.3755   |  | 0.7689      | 0.2613   | -0.17475 |
| A-Fossil | <i>Vallesaurus</i>                      | 2.8413    | 0.84882  | -1.4215  | 1.1571   |  | 0.55119     | -0.12724 | -0.11126 |
| A-Fossil | <i>Sumina</i>                           | 2.2808    | -1.2363  | -0.43292 | 0.28869  |  | 0.69756     | 0.50001  | -0.2179  |
| Liz      | <i>Anolis sp.</i>                       | 1.0461    | 1.9639   | -1.3543  | -0.74077 |  | 0.14268     | -0.17629 | -0.04346 |
| Liz      | <i>Crotaphytus collaris</i>             | 0.62737   | 1.649    | 0.54607  | -0.10933 |  | 0.31224     | -0.45044 | 0.042762 |
| Liz      | <i>Draco sp.</i>                        | 0.99738   | 1.811    | -0.83202 | -0.50438 |  | 0.18657     | -0.22647 | -0.06029 |
| Liz      | <i>Lacerta agilis</i>                   | 0.80037   | 1.7107   | -0.10123 | -0.12477 |  | 0.275       | -0.3289  | -0.08829 |
| Liz      | <i>Phrynosoma solare</i>                | 0.72446   | 1.6506   | 0.26991  | -0.17267 |  | 0.27483     | -0.39584 | 0.013402 |
| Liz      | <i>Varanus niloticus</i>                | 0.71496   | 1.698    | 0.39967  | -0.13895 |  | 0.31689     | -0.41363 | 0.005955 |
| Liz      | <i>Xuanlong zhaoi</i>                   | 0.94749   | 1.7333   | -0.69768 | -0.42549 |  | 0.18746     | -0.23933 | -0.06591 |
| Scan     | <i>Aliurus filgens</i>                  | 1.567     | 0.62386  | 0.064716 | -0.41491 |  | 0.39925     | -0.10269 | -0.08585 |
| Scan     | <i>Chlorocebus pygerythrus</i>          | 2.3904    | -1.5277  | 0.43769  | -1.0412  |  | 0.54021     | 0.40853  | -0.12185 |
| Scan     | <i>Didelphis sp.</i>                    | 2.0462    | 0.043119 | 0.4089   | 1.8701   |  | 0.82581     | -0.20249 | 0.46226  |

|      |                                  |          |          |          |          |  |          |          |          |
|------|----------------------------------|----------|----------|----------|----------|--|----------|----------|----------|
| Scan | <i>Felis catus</i>               | -1.0038  | 0.87355  | -0.55839 | 0.24354  |  | -0.40042 | -0.43481 | -0.11827 |
| Scan | <i>Genetta genetta</i>           | -0.31282 | 1.1835   | -0.11173 | 0.006407 |  | -0.06054 | -0.37999 | -0.09427 |
| Scan | <i>Gulo gulo</i>                 | -0.14063 | 1.6646   | 0.16471  | -0.0081  |  | 0.15616  | -0.47358 | 0.017522 |
| Scan | <i>Lemur catta</i>               | 1.6788   | -1.7465  | 0.74588  | -0.55961 |  | 0.48317  | 0.55271  | 0.002596 |
| Scan | <i>Leopardus pardal</i>          | -0.97904 | 1.2323   | -1.1722  | 0.052162 |  | -0.38747 | -0.42551 | -0.14496 |
| Scan | <i>Leptailurus serval</i>        | -0.98411 | 1.2286   | -1.1785  | 0.051331 |  | -0.38805 | -0.42602 | -0.14872 |
| Scan | <i>Marmosa mexicana</i>          | 1.2936   | -0.33339 | 0.16133  | 2.06     |  | 0.46459  | 0.052113 | 0.38017  |
| Scan | <i>Martes americana</i>          | 0.78919  | 1.7346   | 0.51542  | -0.27192 |  | 0.3415   | -0.47437 | -0.02924 |
| Scan | <i>Martes pennanti</i>           | 0.77295  | 1.718    | 0.54628  | -0.23328 |  | 0.35205  | -0.49071 | -0.03576 |
| Scan | <i>Monodelphis sp.</i>           | 1.9088   | -0.63342 | 0.54151  | 2.1128   |  | 0.69417  | 0.11007  | 0.37007  |
| Scan | <i>Nasua narica</i>              | 0.44884  | 1.061    | 1.0447   | -0.62156 |  | 0.32835  | -0.28976 | -0.01241 |
| Scan | <i>Panthera pardus</i>           | -0.99049 | 1.206    | -1.201   | 0.034391 |  | -0.41106 | -0.42383 | -0.11915 |
| Scan | <i>Papio papio</i>               | 0.98844  | -1.8599  | 0.86187  | -0.34127 |  | 0.36879  | 0.7493   | 0.1994   |
| Scan | <i>Procyon capensis</i>          | -1.0931  | 0.023219 | 1.5275   | -0.40243 |  | 0.028393 | 0.10823  | 0.20169  |
| Scan | <i>Procyon lotor</i>             | 0.44661  | 1.0185   | 1.0009   | -0.65533 |  | 0.28735  | -0.27638 | 0.016245 |
| Scan | <i>Puma concolor</i>             | -0.98282 | 1.2187   | -1.1888  | 0.044603 |  | -0.39153 | -0.42845 | -0.15525 |
| Scan | <i>Rhampoleon brevicaudatus</i>  | 3.0576   | -1.9745  | -0.27093 | -0.1006  |  | 0.58161  | 0.53731  | 0.006537 |
| Scan | <i>Tamias minus</i>              | 0.46933  | 1.032    | 0.95373  | -0.7047  |  | 0.26864  | -0.25618 | 0.023322 |
| Scan | <i>Tupia ferruginea (gillis)</i> | -0.91807 | 1.2032   | 1.0182   | 0.60746  |  | -0.05501 | -0.42169 | 0.36903  |
| Terr | <i>Acinonyx jubatus</i>          | -1.6398  | 0.33401  | -0.92984 | -0.34896 |  | -0.59496 | -0.19767 | -0.2435  |
| Terr | <i>Canis familiaris</i>          | -2.7074  | -0.22951 | 0.12432  | 0.52555  |  | -0.83019 | -0.10858 | 0.18326  |
| Terr | <i>Cavia porcellus</i>           | -1.2167  | 0.51185  | 1.2863   | 0.16764  |  | -0.06711 | -0.152   | 0.30081  |
| Terr | <i>Chinchilla sp.</i>            | -1.6608  | 0.18767  | 1.0833   | 0.22004  |  | -0.29487 | -0.07675 | 0.32084  |
| Terr | <i>Dasyprocta sp.</i>            | -2.8649  | -0.77821 | 0.49042  | 0.10511  |  | -0.83946 | 0.20755  | 0.093851 |
| Terr | <i>Dipodomys ordii</i>           | -1.4781  | 0.33595  | 1.1053   | 0.20466  |  | -0.2976  | -0.1412  | 0.37807  |
| Terr | <i>Equus caballus</i>            | -2.5471  | -0.52979 | 1.2991   | 0.14323  |  | -0.75904 | 0.19125  | 0.25704  |
| Terr | <i>Erinaceus europaeus</i>       | -1.0604  | 0.65651  | 1.3411   | 0.18128  |  | -0.07321 | -0.24895 | 0.38607  |
| Terr | <i>Helogale parvula</i>          | -1.2313  | 0.32953  | 0.38682  | -0.07836 |  | -0.33899 | -0.26992 | -0.24121 |
| Terr | <i>Hystrix cristata</i>          | -0.50182 | -0.8368  | 1.6472   | 0.027309 |  | 0.21092  | 0.47896  | 0.5377   |
| Terr | <i>Lepus americanus</i>          | -2.8031  | -0.7948  | 0.34848  | 0.032551 |  | -0.80475 | 0.21072  | 0.090255 |
| Terr | <i>Lynx lynx</i>                 | -1.2719  | 0.9533   | -0.29602 | 0.39439  |  | -0.45952 | -0.4567  | 0.10408  |
| Terr | <i>Macropus sp</i>               | -2.3929  | -0.54623 | 0.3371   | -0.12562 |  | -0.73736 | 0.10879  | 0.16219  |
| Terr | <i>Marmot monax</i>              | -0.33432 | 0.71848  | 0.86442  | -0.27612 |  | 0.13851  | -0.24288 | -0.04844 |
| Terr | <i>Mephitis mephitis</i>         | -1.0291  | 0.67699  | 1.315    | 0.15824  |  | -0.03878 | -0.24496 | 0.3452   |
| Terr | <i>Metachirus sp.</i>            | -0.39161 | -1.6179  | 1.4299   | 0.019153 |  | 0.12891  | 0.75889  | 0.43968  |
| Terr | <i>Mustela erminea</i>           | -0.8577  | 1.2539   | 0.91385  | 0.58317  |  | -0.01955 | -0.38561 | 0.29424  |
| Terr | <i>Octodon degu</i>              | -1.1695  | 0.34076  | 0.85988  | 0.088494 |  | -0.14948 | -0.13757 | 0.069086 |
| Terr | <i>Odocoileus sp.</i>            | -2.505   | -0.55034 | 1.2153   | 0.11302  |  | -0.77931 | 0.2104   | 0.20072  |
| Terr | <i>Oryctocagus sp.</i>           | -2.8432  | -0.77967 | 0.44004  | 0.091378 |  | -0.82219 | 0.20832  | 0.086163 |
| Terr | <i>Panthera leo</i>              | -0.98226 | 1.22     | -1.188   | 0.045324 |  | -0.38986 | -0.43028 | -0.16089 |
| Terr | <i>Panthera tigris</i>           | -0.98729 | 1.2136   | -1.1955  | 0.041015 |  | -0.39742 | -0.4285  | -0.14883 |
| Terr | <i>Pecari ta jacu</i>            | -2.5311  | -0.51171 | 1.271    | 0.14887  |  | -0.76917 | 0.19325  | 0.17786  |

|      |                               |          |          |          |          |  |          |          |          |
|------|-------------------------------|----------|----------|----------|----------|--|----------|----------|----------|
| Terr | <i>Rattus sp.</i>             | -0.10599 | 0.82886  | 0.92057  | -0.45701 |  | 0.1853   | -0.22695 | 0.002576 |
| Terr | <i>Spermophilus franklini</i> | -0.36672 | 0.73373  | 0.97408  | -0.25918 |  | 0.14664  | -0.26542 | -0.009   |
| Terr | <i>Sus sp.</i>                | -2.4115  | -0.5648  | 0.98363  | 0.00594  |  | -0.6739  | 0.2227   | 0.1414   |
| Terr | <i>Tapirus sp.</i>            | -2.5062  | -0.55717 | 1.1669   | 0.095844 |  | -0.70329 | 0.19024  | 0.24351  |
| Terr | <i>Taxidea taxus</i>          | -0.42898 | 0.17644  | 1.1659   | -0.7477  |  | 0.15819  | 0.008576 | -0.11327 |
| Terr | <i>Urogale everetti</i>       | -0.85947 | 1.2032   | 0.87638  | 0.56022  |  | -0.06732 | -0.3804  | 0.33613  |
| BB   | <i>Archaeopteryx</i>          | -1.6974  | -0.88507 | -1.1311  | 0.047803 |  | -0.57421 | 0.19891  | -0.08413 |
| BB   | <i>Archaeopteryx</i>          | -1.6889  | -0.90017 | -1.1457  | 0.008097 |  | -0.57767 | 0.19719  | -0.06807 |
| BB   | <i>Archaeopteryx</i>          | -1.7187  | -0.92814 | -1.0631  | 0.016454 |  | -0.60286 | 0.19291  | -0.03594 |
| Ther | <i>Allosaurus</i>             | -1.6651  | -0.7766  | -1.0069  | 0.060078 |  | -0.49533 | 0.20729  | -0.18523 |
| Ther | <i>Anchiornis</i>             | -1.6943  | -0.93979 | -1.1969  | -0.02511 |  | -0.58112 | 0.19938  | -0.04283 |
| Ther | <i>Bambiraptor</i>            | -1.7568  | -0.90788 | -0.87922 | 0.03982  |  | -0.60472 | 0.19002  | -0.0457  |
| Ther | <i>Caudipteryx</i>            | -1.8441  | -1.3884  | -0.63228 | -0.41056 |  | -0.54243 | 0.45235  | -0.17837 |
| Ther | <i>Caudipteryx</i>            | -1.8486  | -1.4182  | -0.67107 | -0.41068 |  | -0.5527  | 0.45396  | -0.16538 |
| Ther | <i>Compsognathus</i>          | -2.0209  | -0.26639 | -0.82242 | 0.081774 |  | -0.56919 | -0.0247  | -0.11366 |
| Ther | <i>Compsognathus</i>          | -2.0004  | -0.2568  | -0.85097 | 0.065954 |  | -0.56179 | -0.02105 | -0.12423 |
| Ther | <i>Dalianraptor</i>           | -1.6385  | -0.84317 | -1.27    | -0.03341 |  | -0.53548 | 0.19727  | -0.09521 |
| Ther | <i>Epidendrosaurus</i>        | -1.6516  | -0.84132 | -1.2038  | 0.019897 |  | -0.54075 | 0.20373  | -0.12316 |
| Ther | <i>Mei long</i>               | -1.9546  | -0.76264 | -1.256   | -0.11076 |  | -0.6377  | 0.19233  | -0.01756 |
| Ther | <i>Microraptor gui</i>        | -1.7666  | -0.94271 | -0.91318 | 0.067358 |  | -0.61574 | 0.20308  | -0.05644 |
| Ther | <i>Microraptor zhaoianus</i>  | -1.8052  | -0.85629 | -1.2531  | -0.14661 |  | -0.6338  | 0.20541  | -0.04118 |
| Ther | <i>Sinornithoides</i>         | -1.8701  | -1.4242  | -0.60774 | -0.40357 |  | -0.56186 | 0.45322  | -0.15591 |
| Ther | <i>Sinornithomimus</i>        | -2.1164  | -1.4403  | -0.45799 | -0.18471 |  | -0.59938 | 0.51338  | -0.23926 |
| Ther | <i>Sinosauopteryx</i>         | -2.0547  | -0.26004 | -0.69655 | 0.13103  |  | -0.57893 | -0.0347  | -0.1218  |
| Ther | <i>Sinosauopteryx</i>         | -2.0729  | -0.25587 | -0.61786 | 0.14214  |  | -0.58763 | -0.04291 | -0.12388 |
| Ther | <i>Struthiomimus</i>          | -2.1546  | -1.4435  | -0.32352 | -0.1556  |  | -0.62549 | 0.51803  | -0.22652 |
| Ther | <i>Tyrannosaurus</i>          | -2.0391  | -0.23805 | -0.67195 | 0.12796  |  | -0.553   | -0.02678 | -0.18162 |
