# Supplementary material for: Assessing Arboreal Adaptations of Bird Antecedents: Testing the Ecological Setting of the Origin of the Avian Flight Stroke
Source: PLoS One. 2011 Aug 9;6(8):e22292. doi: 10.1371/journal.pone.0022292 (PMC3153453; doi:10.1371/journal.pone.0022292)
Supplement: Table S7 — PCO loadings for first 3 axes for bipedal (avian) only dataset. Percentage of variance explained by the first three axes for Euclidean setting: 68.0, 14.1 and 7.9%. For Correlation setting: 60.4, 10.5 and 6.7%. All other axes explain less than 5% of the variance. (PDF) [file pone.0022292.s020.pdf]

| category | taxon                             | Euclidean |          |          |  | Correlation |          |          |
|----------|-----------------------------------|-----------|----------|----------|--|-------------|----------|----------|
|          |                                   | axis 1    | axis 2   | axis 3   |  | axis 1      | axis 2   | axis 3   |
| A        | <i>Ara macao</i>                  | 1.23280   | 0.04016  | 0.46517  |  | 0.35189     | 0.13323  | 0.03078  |
| A        | <i>Chaetura pelagica</i>          | 1.35500   | -0.16292 | 0.11525  |  | 0.51657     | 0.13716  | 0.02280  |
| A        | <i>Opisthocomus hoazin</i>        | 2.35690   | -1.79070 | -0.87338 |  | 0.28675     | 0.12330  | -0.33742 |
| A        | <i>Alcedo atthis</i>              | 0.92095   | 0.06414  | -0.72338 |  | 0.26206     | -0.16176 | -0.14133 |
| A        | <i>Coccyzus erythrophthalmus</i>  | 0.67694   | 0.49809  | -0.24135 |  | 0.21104     | -0.10041 | -0.03967 |
| BOP      | <i>Bubo virginianus</i>           | 1.62300   | -0.73741 | -0.19413 |  | 0.25741     | 0.08912  | -0.10320 |
| BOP      | <i>Buteo jamaicensis</i>          | 0.77376   | 0.47820  | 0.84327  |  | 0.25635     | 0.05348  | 0.25760  |
| BOP      | <i>Falco sparverius</i>           | 0.85297   | 0.40543  | 0.77703  |  | 0.27566     | 0.07284  | 0.20694  |
| BOP      | <i>Strix varia</i>                | 1.78290   | -1.01970 | -0.36373 |  | 0.20178     | 0.07496  | -0.14533 |
| C        | <i>Certhia familiaris</i>         | 1.23740   | -0.22091 | 0.42038  |  | 0.32408     | 0.12247  | 0.04270  |
| C        | <i>Dryocopus pileatus</i>         | 1.62300   | -0.72694 | -0.16281 |  | 0.49297     | 0.14689  | -0.13019 |
| C        | <i>Melanerpes erythrocephalus</i> | 1.43970   | -0.53037 | 0.00121  |  | 0.49854     | 0.14103  | -0.03393 |
| C        | <i>Sitta europaea</i>             | 1.20060   | -0.06985 | 0.44475  |  | 0.22688     | 0.08938  | 0.02447  |
| G        | <i>Cinclus cinclus</i>            | 0.24323   | -0.44713 | 0.71144  |  | 0.04962     | 0.18189  | 0.06208  |
| G        | <i>Columba livia</i>              | 0.52149   | 0.81438  | -0.06598 |  | 0.34224     | -0.13759 | 0.04910  |
| G        | <i>Corvus corax</i>               | 1.10680   | 0.02522  | 0.53239  |  | 0.21391     | 0.08453  | 0.05694  |
| G        | <i>Corvus frugilegus</i>          | 0.63295   | 0.48943  | -0.21589 |  | 0.16007     | -0.10942 | -0.02052 |
| G        | <i>Crotophaga ani</i>             | 0.75308   | 0.37073  | -0.54761 |  | 0.38738     | -0.22363 | -0.05464 |
| G        | <i>Geococcyx sp.</i>              | 0.64160   | 0.39661  | -0.47226 |  | 0.25615     | -0.25388 | 0.01226  |
| G        | <i>Goura cristata</i>             | 0.40054   | 0.86616  | 0.01532  |  | 0.23796     | -0.17721 | 0.11725  |
| G        | <i>Melanocorypha calandra</i>     | 0.38446   | 0.82380  | 0.00332  |  | 0.17635     | -0.19020 | 0.11975  |
| G        | <i>Pica pica</i>                  | 0.59469   | 0.51385  | -0.19022 |  | 0.14132     | -0.11985 | -0.00361 |
| G        | <i>Sturnus vulgaris</i>           | 0.61522   | 0.54809  | -0.19207 |  | 0.18757     | -0.11213 | -0.01292 |
| G        | <i>Turdus philomelos</i>          | 0.74201   | 0.30751  | -0.33189 |  | 0.13195     | -0.09692 | -0.05969 |
| GB       | <i>Alectoris rufa</i>             | -0.23882  | 0.16878  | 0.01123  |  | 0.05178     | 0.03015  | -0.02302 |
| GB       | <i>Anhima cornuta</i>             | -0.33279  | 0.10726  | 0.05199  |  | -0.06310    | -0.04429 | 0.03509  |
| GB       | <i>Cariama cristata</i>           | -1.58210  | -0.20203 | 0.49758  |  | -0.57682    | 0.01062  | 0.29600  |
| GB       | <i>Dromaius novaehollandiae</i>   | -1.80230  | 0.24389  | -0.40752 |  | -0.60480    | -0.19590 | 0.01567  |
| GB       | <i>Gallus gallus</i>              | -0.42282  | 0.20715  | 0.12957  |  | -0.08665    | -0.06884 | 0.09268  |
| GB       | <i>Meleagris gallopavo</i>        | -0.33963  | 0.14300  | 0.06201  |  | -0.05206    | -0.03906 | 0.03681  |
| GB       | <i>Rhea sp.</i>                   | -1.82600  | 0.30989  | -0.37968 |  | -0.62387    | -0.20612 | 0.04025  |
| GB       | <i>Struthio camelus</i>           | -1.79140  | 0.29149  | -0.40162 |  | -0.59566    | -0.19112 | 0.00409  |
| BB       | <i>Confuciusornis</i>             | 0.57638   | 0.67842  | -0.13388 |  | 0.29778     | 0.09639  | 0.13674  |
| BB       | <i>Jeholornis</i>                 | 0.50485   | 0.67771  | -0.08923 |  | 0.26355     | -0.11959 | 0.00910  |
| BB       | <i>Pengornis</i>                  | 0.66438   | 0.51805  | -0.23056 |  | 0.13725     | -0.14010 | 0.04006  |
| BB       | <i>Sapeornis</i>                  | 0.97944   | 0.27950  | 0.67005  |  | 0.18215     | -0.13784 | 0.04306  |
| BB       | <i>Sinornis</i>                   | 0.50600   | 0.62107  | -0.10650 |  | 0.21427     | -0.10360 | -0.03440 |

|      |                              |          |          |          |  |          |          |          |
|------|------------------------------|----------|----------|----------|--|----------|----------|----------|
| BB   | <i>Archaeopteryx</i>         | -1.01350 | -0.61204 | 0.06332  |  | -0.25578 | 0.13770  | -0.09191 |
| BB   | <i>Archaeopteryx</i>         | -1.10130 | -0.54455 | 0.13111  |  | -0.29643 | 0.11680  | -0.04108 |
| BB   | <i>Archaeopteryx</i>         | -1.17860 | -0.48051 | 0.19602  |  | -0.33850 | 0.10378  | 0.00851  |
| Ther | <i>Anchiornis</i>            | -1.10580 | -0.55166 | 0.13731  |  | -0.30332 | 0.11465  | -0.03753 |
| Ther | <i>Bambiraptor</i>           | -1.24230 | -0.23897 | 0.30042  |  | -0.32359 | 0.17289  | 0.05998  |
| Ther | <i>Caudipteryx</i>           | -1.56260 | -0.00248 | -0.60749 |  | -0.43711 | -0.10586 | -0.19539 |
| Ther | <i>Caudipteryx</i>           | -1.60480 | 0.07074  | -0.56424 |  | -0.45785 | -0.11717 | -0.16994 |
| Ther | <i>Compsognathus</i>         | -1.01650 | -0.40070 | 0.10749  |  | -0.18408 | 0.23837  | -0.10943 |
| Ther | <i>Dalianraptor</i>          | -1.10140 | -0.56566 | 0.12137  |  | -0.30223 | 0.10924  | -0.04020 |
| Ther | <i>Mei long</i>              | -1.27470 | -0.32150 | 0.29722  |  | -0.37770 | 0.11560  | 0.08176  |
| Ther | <i>Microraptor gui</i>       | -1.20610 | -0.38404 | 0.24098  |  | -0.33861 | 0.12759  | 0.02878  |
| Ther | <i>Microraptor zhaoianus</i> | -1.21000 | -0.38601 | 0.23844  |  | -0.33924 | 0.12204  | 0.03051  |
| Ther | <i>Sinornithoides</i>        | -1.20720 | -0.31553 | 0.25140  |  | -0.31199 | 0.14996  | 0.02759  |
| Ther | <i>Sinosauropteryx</i>       | -1.20870 | -0.26237 | 0.25993  |  | -0.28225 | 0.16581  | 0.02502  |
| Ther | <i>Struthiomimus</i>         | -1.57380 | 0.01523  | -0.60155 |  | -0.44166 | -0.10936 | -0.18900 |
