# Supplementary material for: Assessing Arboreal Adaptations of Bird Antecedents: Testing the Ecological Setting of the Origin of the Avian Flight Stroke
Source: PLoS One. 2011 Aug 9;6(8):e22292. doi: 10.1371/journal.pone.0022292 (PMC3153453; doi:10.1371/journal.pone.0022292)
Supplement: Table S8 — Forelimb measurements and BI for theropods and basal birds. (PDF) [file pone.0022292.s021.pdf]

| category | taxon                   | H     | U    | BI   | Ref               |
|----------|-------------------------|-------|------|------|-------------------|
| BB       | <i>Archaeopteryx</i>    | 75    | 67.5 | 0.9  | [35]              |
| BB       | <i>Archaeopteryx</i>    | 63    | 55   | 0.87 | [35]              |
| BB       | <i>Archaeopteryx</i>    | 41.5  | 36.5 | 0.88 | [35]              |
| BB       | <i>Archaeopteryx</i>    | 72    | 62   | 0.86 | [35]              |
| BB       | <i>Archaeopteryx</i>    | 55    | 53   | 0.96 | [35]              |
| BB       | <i>Archaeopteryx</i>    | 83    | 74   | 0.89 | [35]              |
| BB       | <i>Archaeopteryx</i>    | 56.9  | 50.9 | 0.89 | [35]              |
| BB       | <i>Changchengornis</i>  | 33.5  | 32   | 0.95 | [36]              |
| BB       | <i>Confuciusornis</i>   | 51    | 46   | 0.9  | [36]              |
| BB       | <i>Confuciusornis</i>   | 62    | 61   | 0.98 | Pers. obs         |
| BB       | <i>Confuciusornis</i>   | 42    | 35   | 0.83 | Pers. obs         |
| BB       | <i>Confuciusornis</i>   | 51    | 42   | 0.82 | [36]              |
| BB       | <i>Dalianraptor</i>     | 52    | 46   | 0.88 | [28]              |
| BB       | <i>Jeholornis</i>       | 100   | 109  | 1.09 | [37]              |
| BB       | <i>Jixiangornis</i>     | 112   | 107  | 0.96 | [38]              |
| BB       | <i>Patagopteryx</i>     | 65.4  | 53   | 0.81 | [39]              |
| BB       | <i>Pengornis</i>        | 64.3  | 70.7 | 1.1  | [22]              |
| BB       | <i>Sapeornis</i>        | 122.6 | 124  | 1.01 | [40]              |
| BB       | <i>Shenzhouraptor</i>   | 79.8  | 83.4 | 1.05 | [41]              |
| BB       | <i>Sinornis</i>         | 24    | 22   | 0.92 | [23]              |
| BB       | <i>Yixianornis</i>      | 49.3  | 50.3 | 1.02 | [42]              |
|          |                         |       |      |      |                   |
| Ther     | <i>Acrocanthosaurus</i> | 370   | 255  | 0.69 | Pers. com. Currie |
| Ther     | <i>Albertosaurus</i>    | 205   | 125  | 0.61 | [43]              |
| Ther     | <i>Allosaurus</i>       | 310   | 263  | 0.85 | [24]              |
| Ther     | <i>Alxasaurus</i>       | 375   | 245  | 0.65 | [44]              |
| Ther     | <i>Anchiornis</i>       | 69    | 55.1 | 0.8  | [25]              |
| Ther     | <i>Bambiraptor</i>      | 105   | 93   | 0.89 | [26]              |
| Ther     | <i>Baryonyx</i>         | 463   | 283  | 0.61 | [45]              |
| Ther     | <i>Buetreraptor</i>     | 135   | 110  | 0.81 | [46]              |

|      |                        |      |      |      |                     |
|------|------------------------|------|------|------|---------------------|
| Ther | <i>Carnotaurus</i>     | 285  | 78   | 0.27 | [47]                |
| Ther | <i>Caudipteryx</i>     | 73   | 61   | 0.84 | [48]                |
| Ther | <i>Caudipteryx</i>     | 69   | 61   | 0.88 | [49]                |
| Ther | <i>Caudipteryx</i>     | 72   | 62   | 0.86 | [49]                |
| Ther | <i>Citipati</i>        | 235  | 245  | 1.04 | Pers. com Balanoff  |
| Ther | <i>Coelurus</i>        | 119  | 96   | 0.81 | [50]                |
| Ther | <i>Coleophysis</i>     | 120  | 65   | 0.54 | [51]                |
| Ther | <i>Coleophysis</i>     | 134  | 82   | 0.61 | [51]                |
| Ther | <i>Compsognathus</i>   | 38   | 28.6 | 0.75 | [27]                |
| Ther | <i>Compsognathus</i>   | 56.3 | 46.4 | 0.82 | [27]                |
| Ther | <i>Daspletosaurus</i>  | 357  | 214  | 0.6  | [43]                |
| Ther | <i>Deinonychus</i>     | 237  | 186  | 0.78 | [52]                |
| Ther | <i>Deinonychus</i>     | 254  | 208  | 0.82 | [53]                |
| Ther | <i>Dilophosaurus</i>   | 285  | 209  | 0.73 | [54]                |
| Ther | <i>Epidendrosaurus</i> | 17.1 | 15   | 0.88 | [55]                |
| Ther | <i>Epidendrosaurus</i> | 18.5 | 15.8 | 0.85 | [55]                |
| Ther | <i>Epidexipteryx</i>   | 50   | 42   | 0.84 | [55]                |
| Ther | <i>Falcarius</i>       | 255  | 197  | 0.77 | [56]                |
| Ther | <i>Fukuiraptor</i>     | 242  | 211  | 0.87 | [57]                |
| Ther | <i>Gallimimus</i>      | 530  | 375  | 0.71 | [58]                |
| Ther | <i>Gigantoraptor</i>   | 700  | 560  | 0.8  | Pers.com. Xu        |
| Ther | <i>Gracilliraptor</i>  | 106  | 91   | 0.86 | [59]                |
| Ther | <i>Guanlong</i>        | 222  | 178  | 0.8  | [60]                |
| Ther | <i>Harpymimus</i>      | 294  | 242  | 0.82 | [61]                |
| Ther | <i>Herrerasaurus</i>   | 175  | 153  | 0.87 | [62]                |
| Ther | <i>Heyuannia</i>       | 130  | 117  | 0.9  | [63]                |
| Ther | <i>Huxiagnathus</i>    | 88   | 54.8 | 0.62 | [64]                |
| Ther | <i>Jinfengopteryx</i>  | 49.2 | 43.3 | 0.88 | [65]                |
| Ther | <i>Juravenator</i>     | 27   | 19.5 | 0.72 | [66]                |
| Ther | <i>Khaan</i>           | 115  | 110  | 0.96 | Pers. com. Balanoff |
| Ther | <i>Limusaurus</i>      | 80   | 40   | 0.5  | [67]                |

|      |                           |      |      |      |                    |
|------|---------------------------|------|------|------|--------------------|
| Ther | <i>Mahakala</i>           | 40   | 40   | 1    | [68]               |
| Ther | <i>Mei Long</i>           | 42   | 42   | 1    | [30]               |
| Ther | <i>Microraptor</i>        | 62.1 | 53.8 | 0.87 | [31]               |
| Ther | <i>Microraptor</i>        | 42   | 37   | 0.88 | Pers. com Xu       |
| Ther | <i>Microraptor</i>        | 62.9 | 53.5 | 0.85 | [31]               |
| Ther | <i>Microraptor gui</i>    | 82   | 73   | 0.89 | Pers. obs.         |
| Ther | <i>Mononykus</i>          | 36.7 | 34.4 | 0.94 | [69]               |
| Ther | <i>Nothronychus</i>       | 418  | 302  | 0.72 | [70]               |
| Ther | <i>Ornithomimus</i>       | 276  | 206  | 0.75 | [34]               |
| Ther | <i>Oviraptor</i>          | 185  | 147  | 0.79 | [71]               |
| Ther | <i>Poekilopleuron</i>     | 310  | 180  | 0.58 | [72]               |
| Ther | <i>Protoarchaeopteryx</i> | 88   | 74   | 0.84 | [73]               |
| Ther | <i>Raptorex</i>           | 99   | 57   | 0.58 | [60]               |
| Ther | <i>Segnosaurus</i>        | 560  | 390  | 0.7  | [74]               |
| Ther | <i>Sinornithoides</i>     | 83.2 | 65   | 0.78 | [32]               |
| Ther | <i>Sinornithomimus</i>    | 212  | 147  | 0.69 | [33]               |
| Ther | <i>Sinornithosaurus</i>   | 134  | 110  | 0.82 | [46]               |
| Ther | <i>Sinosauropteryx</i>    | 20.3 | 16.9 | 0.83 | Pers. com. Currie  |
| Ther | <i>Sinosauropteryx</i>    | 35.5 | 28.2 | 0.79 | Pers. com. Currie  |
| Ther | <i>Sinovenator</i>        | 71   | 59   | 0.83 | [46]               |
| Ther | <i>Struthiomimus</i>      | 310  | 246  | 0.79 | [34]               |
| Ther | <i>Szechuanosaurus</i>    | 360  | 240  | 0.67 | [75]               |
| Ther | <i>Tanycolagreus</i>      | 198  | 152  | 0.77 | [76]               |
| Ther | <i>Tianyraptor</i>        | 129  | 103  | 0.8  | Pers com. Sullivan |
| Ther | <i>Torvosaurus</i>        | 424  | 220  | 0.52 | [77]               |
| Ther | <i>Tyrannosaurus</i>      | 385  | 214  | 0.56 | Pers. com. Currie  |
| Ther | <i>Yixianosaurus</i>      | 89   | 64   | 0.72 | [78]               |
