# Supplementary material for: Assessing Arboreal Adaptations of Bird Antecedents: Testing the Ecological Setting of the Origin of the Avian Flight Stroke
Source: PLoS One. 2011 Aug 9;6(8):e22292. doi: 10.1371/journal.pone.0022292 (PMC3153453; doi:10.1371/journal.pone.0022292)
Supplement: Table S11 — Theropod hindlimb lengths and relative length scores. Est C = mass estimate based on femoral circumference from Christiansen and Farina 2004, Est L = estimate based on femoral length from Christiansen and Farina 2004, M = mass used in kg, F = femur length, T = tibia length, Mt = metatarsus length, Leg L = leg length (F+T+Mt), Rleg L = (F+T+TMT)/M0.33, TL = T/M0.33, RTL = TL/Avg, TMTL = TMT/M0.33, R TMTL = TMTL/Avg. (PDF) [file pone.0022292.s024.pdf]

| category | taxon                  | F   | Est C | Est L | M    | Tibia | MtIII | Leg L | Rleg L | TL        | RTL | MtL  | RMTL |
|----------|------------------------|-----|-------|-------|------|-------|-------|-------|--------|-----------|-----|------|------|
| BB       | <i>Archaeopteryx</i>   | 53  | 0.18  | 0.18  | 0.18 | 71    | 37    | 161   | 0.29   | 126.<br>2 | 1.2 | 65.8 | 1.1  |
| BB       | <i>Archaeopteryx</i>   | 37  | 0.15  | 0.06  | 0.06 | 53    | 30    | 120   | 0.30   | 132.<br>9 | 1.3 | 76.4 | 1.3  |
| BB       | <i>Archaeopteryx</i>   | 61  | 0.22  | 0.29  | 0.22 | 81    | 44    | 185   | 0.30   | 132.<br>7 | 1.3 | 72.5 | 1.2  |
| BB       | <i>Archaeopteryx</i>   | 48  | 0.12  | 0.12  | 0.12 | 71    | 41    | 160   | 0.33   | 145.<br>0 | 1.4 | 82.7 | 1.4  |
| BB       | <i>Archaeopteryx</i>   | 70  | 0.95  | 0.39  | 0.40 | 90    | 48    | 207   | 0.28   | 121.<br>1 | 1.1 | 64.3 | 1.1  |
| BB       | <i>Archaeopteryx</i>   | 50  | X     | X     | 0.15 | 75    | 40    | 165   | 0.31   | 139.<br>5 | 1.3 | 74.1 | 1.2  |
| BB       | <i>Confuciusornis</i>  | 45  | X     | 0.20  | 0.20 | 55    | 26    | 126   | 0.21   | 93.6      | 0.9 | 44.2 | 0.7  |
| BB       | <i>Confuciusornis</i>  | 33  | X     | 0.06  | 0.06 | 41    | 20    | 94    | 0.24   | 103.<br>8 | 1.0 | 50.6 | 0.9  |
| BB       | <i>Dalianraptor</i>    | 49  | 0.77  | 0.14  | 0.14 | 68    | 43    | 160   | 0.31   | 130.<br>1 | 1.2 | 82.3 | 1.4  |
| BB       | <i>Jeholornis</i>      | 75  | 0.57  | X     | 0.57 | 94    | 53    | 222   | 0.27   | 112.<br>7 | 1.1 | 63.8 | 1.1  |
| BB       | <i>Jixiangornis</i>    | 72  | X     | 0.50  | 0.50 | 83    | 41    | 196   | 0.25   | 104.<br>6 | 1.0 | 51.9 | 0.9  |
| BB       | <i>Patagopteryx</i>    | 103 | 4.1   | 1.6   | 1.6  | 140   | 52    | 295   | 0.25   | 119.<br>9 | 1.1 | 44.5 | 0.8  |
| BB       | <i>Pengornis</i>       | 48  | X     | 0.15  | 0.15 | 50    | 27    | 125   | 0.23   | 94.3      | 0.9 | 49.6 | 0.8  |
| BB       | <i>Sapeornis</i>       | 80  | X     | 0.71  | 0.71 | 84    | 45    | 209   | 0.23   | 93.6      | 0.9 | 49.9 | 0.8  |
| BB       | <i>Shenzhouraptor</i>  | 55  | 0.77  | 0.21  | 0.21 | 68    | 35    | 158   | 0.26   | 114.<br>3 | 1.1 | 57.9 | 1.0  |
| BB       | <i>Sinornis</i>        | 21  | X     | 0.01  | 0.01 | 26    | 15    | 62    | 0.28   | 120.<br>7 | 1.1 | 66.7 | 1.1  |
| BB       | <i>Yixianornis</i>     | 41  | 0.29  | 0.90  | 0.09 | 53    | 27    | 121   | 0.27   | 116.<br>9 | 1.1 | 59.8 | 1.0  |
|          |                        |     |       |       |      |       |       |       |        |           |     |      |      |
| Ther     | <i>Achillobator</i>    | 505 | 767   | 264   | 264  | 490   | 234   | 1229  | 0.20   | 77.8      | 0.7 | 37.2 | 0.6  |
| Ther     | <i>Allosaurus</i>      | 850 | 1403  | 1547  | 1400 | 690   | 327   | 1867  | 0.17   | 63.2      | 0.6 | 30.0 | 0.5  |
| Ther     | <i>Anchiornis</i>      | 66  | X     | X     | 0.40 | 106   | 55    | 228   | 0.31   | 144.<br>0 | 1.4 | 74.7 | 1.3  |
| Ther     | <i>Australovenator</i> | 578 | 773   | 408   | 410  | 569   | 322   | 1469  | 0.20   | 78.1      | 0.7 | 44.2 | 0.7  |
| Ther     | <i>Austroraptor</i>    | 560 | 665   | 369   | 370  | 565   | 330   | 1455  | 0.21   | 80.3      | 0.8 | 46.9 | 0.8  |

|      |                           |      |       |      |      |      |     |      |      |           |     |      |     |
|------|---------------------------|------|-------|------|------|------|-----|------|------|-----------|-----|------|-----|
| Ther | <i>Bambiraptor</i>        | 118  | 3.8   | 2.4  | 2.5  | 170  | 81  | 369  | 0.27 | 125.<br>6 | 1.2 | 59.9 | 1.0 |
| Ther | <i>Beipiaosaurus</i>      | 265  | 160.0 | 31.0 | 31.0 | 275  | 107 | 647  | 0.21 | 88.6      | 0.8 | 34.5 | 0.6 |
| Ther | <i>Caudipteryx dongi</i>  | 152  | 13.0  | 5.5  | 5.5  | 196  | 124 | 472  | 0.27 | 111.<br>7 | 1.1 | 70.7 | 1.2 |
| Ther | <i>Caudipteryx sp.</i>    | 145  | 11.2  | 4.7  | 4.7  | 183  | 112 | 440  | 0.26 | 109.<br>8 | 1.0 | 67.2 | 1.1 |
| Ther | <i>Caudipteryx zoui</i>   | 145  | 9.4   | 4.7  | 4.7  | 188  | 113 | 446  | 0.27 | 112.<br>8 | 1.1 | 67.8 | 1.1 |
| Ther | <i>Ceratops</i>           | 759  | 964   | 982  | 960  | 594  | X   | X    | X    | 61.6      | 0.6 | X    | X   |
| Ther | <i>Coelophysis</i>        | 209  | X     | 15   | 15   | 224  | 126 | 559  | 0.23 | 91.7      | 0.9 | 51.6 | 0.9 |
| Ther | <i>Coelophysis</i>        | 123  | X     | 2.6  | 2.6  | 136  | 82  | 341  | 0.25 | 99.2      | 0.9 | 59.8 | 1.0 |
| Ther | <i>Compsognathus</i>      | 109  | 4.1   | 1.9  | 1.9  | 132  | 81  | 322  | 0.26 | 106.<br>6 | 1.0 | 65.5 | 1.1 |
| Ther | <i>Deinonychus</i>        | 336  | 96    | 71   | 71   | 368  | 164 | 868  | 0.21 | 90.1      | 0.9 | 40.3 | 0.7 |
| Ther | <i>Delatdromeus</i>       | 740  | 399   | 905  | 400  | 700  | 450 | 1890 | 0.26 | 96.9      | 0.9 | 62.3 | 1.1 |
| Ther | <i>Dilophosaurus</i>      | 557  | 399   | 350  | 350  | 555  | 300 | 1412 | 0.20 | 80.3      | 0.8 | 43.4 | 0.7 |
| Ther | <i>Elaphrosaurus</i>      | 520  | 287   | 307  | 287  | 608  | 378 | 1506 | 0.23 | 93.9      | 0.9 | 58.4 | 1.0 |
| Ther | <i>Eoraptor</i>           | 152  | 12    | 6    | 6    | 157  | 81  | 390  | 0.22 | 86.9      | 0.8 | 44.8 | 0.8 |
| Ther | <i>Epidendrosaurus</i>    | 17   | X     | 0.01 | 0.01 | 19   | 12  | 48   | 0.27 | 110.<br>6 | 1.0 | 69.0 | 1.2 |
| Ther | <i>Epidendrosaurus</i>    | 16   | X     | 0.01 | 0.01 | 19   | 12  | 47   | 0.27 | 108.<br>6 | 1.0 | 68.4 | 1.2 |
| Ther | <i>Epidexipteryx</i>      | 51   | 0.49  | 0.16 | 0.16 | 63   | 31  | 145  | 0.27 | 115.<br>3 | 1.1 | 56.8 | 1.0 |
| Ther | <i>Eustreptospondylus</i> | 498  | 350   | 273  | 275  | 479  | 232 | 1209 | 0.19 | 75.1      | 0.7 | 36.4 | 0.6 |
| Ther | <i>Gallimimus</i>         | 665  | 442   | 689  | 442  | 740  | 530 | 1935 | 0.26 | 99.1      | 0.9 | 71.0 | 1.2 |
| Ther | <i>Gigantoraptor</i>      | 1100 | 2260  | 3246 | 2260 | 1177 | 583 | 2860 | 0.22 | 92.0      | 0.9 | 45.6 | 0.8 |
| Ther | <i>Gorgosaurus</i>        | 1040 | 5262  | 2710 | 2710 | 1000 | 594 | 2634 | 0.19 | 73.6      | 0.7 | 43.7 | 0.7 |
| Ther | <i>Guaibasaurus</i>       | 206  | 27.2  | 16.6 | 16.6 | 212  | 95  | 513  | 0.20 | 83.9      | 0.8 | 37.6 | 0.6 |
| Ther | <i>Guanlong</i>           | 416  | X     | 142  | 142  | 424  | 360 | 1200 | 0.23 | 82.6      | 0.8 | 70.2 | 1.2 |
| Ther | <i>Haplocheirus</i>       | 214  | X     | 16.7 | 16.7 | 269  | 134 | 617  | 0.24 | 106.<br>3 | 1.0 | 52.8 | 0.9 |
| Ther | <i>Heyuannia</i>          | 255  | 55    | 29   | 29   | 320  | 135 | 710  | 0.23 | 105.<br>3 | 1.0 | 44.4 | 0.8 |
| Ther | <i>Huxiagnathus</i>       | 163  | 13    | 7    | 7    | 183  | 110 | 456  | 0.24 | 96.5      | 0.9 | 57.7 | 1.0 |
| Ther | <i>Jinfengopteryx</i>     | 70   | X     | 0.46 | 0.46 | 101  | 60  | 231  | 0.30 | 129.      | 1.2 | 77.5 | 1.3 |

|      |                              |     |      |      |      |     |     |      |      |           |     |       |     |
|------|------------------------------|-----|------|------|------|-----|-----|------|------|-----------|-----|-------|-----|
|      |                              |     |      |      |      |     |     |      |      | 9         |     |       |     |
| Ther | <i>Khaan</i>                 | 193 | 24   | 12   | 12   | 240 | 110 | 543  | 0.24 | 105.<br>7 | 1.0 | 48.5  | 0.8 |
| Ther | <i>Mahakala</i>              | 79  | X    | X    | 0.40 | 110 | 51  | 240  | 0.32 | 148.<br>8 | 1.4 | 69.0  | 1.2 |
| Ther | <i>Mei long</i>              | 81  | X    | X    | 0.40 | 108 | 58  | 247  | 0.33 | 146.<br>1 | 1.4 | 78.5  | 1.3 |
| Ther | <i>Microraptor gui</i>       | 97  | 0.77 | 1.30 | 0.77 | 124 | 70  | 292  | 0.32 | 135.<br>6 | 1.3 | 76.4  | 1.3 |
| Ther | <i>Microraptor zhaoianus</i> | 75  | 0.30 | 0.60 | 0.30 | 94  | 48  | 217  | 0.32 | 140.<br>2 | 1.3 | 71.1  | 1.2 |
| Ther | <i>Microraptor zhaoianus</i> | 75  | 0.30 | 0.60 | 0.30 | 96  | 49  | 220  | 0.33 | 142.<br>1 | 1.3 | 73.5  | 1.2 |
| Ther | <i>Ornitholestes</i>         | 215 | 24.1 | 16.9 | 16.9 | X   | 119 | X    | X    | X         | X   | 46.8  | 0.8 |
| Ther | <i>Ornithomimus</i>          | 435 | 89   | 173  | 89   | 475 | 310 | 1220 | 0.28 | 108.<br>0 | 1.0 | 70.5  | 1.2 |
| Ther | <i>Parvicursor</i>           | 53  | 0.14 | 0.18 | 0.14 | 76  | 58  | 186  | 0.36 | 144.<br>6 | 1.4 | 111.2 | 1.9 |
| Ther | <i>Procompsognathus</i>      | 93  | 1.9  | 1.3  | 1.3  | 113 | 69  | 275  | 0.25 | 103.<br>3 | 1.0 | 63.6  | 1.1 |
| Ther | <i>Protoarchaeopteryx</i>    | 147 | 15.0 | 2.6  | 2.6  | 188 | 115 | 450  | 0.33 | 137.<br>2 | 1.3 | 83.9  | 1.4 |
| Ther | <i>Rahonavis</i>             | 88  | 0.68 | 0.91 | 0.68 | 120 | 48  | 256  | 0.29 | 136.<br>1 | 1.3 | 54.5  | 0.9 |
| Ther | <i>Raptorex</i>              | 338 | X    | 72.5 | 72.5 | 397 | 266 | 1001 | 0.24 | 96.6      | 0.9 | 64.7  | 1.1 |
| Ther | <i>Sauornitholestes</i>      | 198 | X    | 16.0 | 16.0 | 243 | 139 | 580  | 0.23 | 97.3      | 0.9 | 55.7  | 0.9 |
| Ther | <i>Similicaudipteryx</i>     | 220 | 20.7 | 18.2 | 18.2 | 240 | 183 | 643  | 0.25 | 92.1      | 0.9 | 70.3  | 1.2 |
| Ther | <i>Sinoraptor</i>            | 876 | 1095 | 1522 | 1095 | 776 | 410 | 2062 | 0.20 | 77.1      | 0.7 | 40.7  | 0.7 |
| Ther | <i>Sinornithoides</i>        | 140 | 5.4  | 4.3  | 4.3  | 191 | 111 | 442  | 0.27 | 117.<br>8 | 1.1 | 68.6  | 1.2 |
| Ther | <i>Sinornithosaurus</i>      | 148 | 3.6  | 5.1  | 3.6  | X   | 93  | X    | X    | X         | X   | 60.9  | 1.0 |
| Ther | <i>Sinosauropteryx</i>       | 86  | X    | 0.90 | 0.90 | 97  | 64  | 247  | 0.26 | 100.<br>4 | 1.0 | 66.2  | 1.1 |
| Ther | <i>Sinosauropteryx</i>       | 53  | 1.12 | 0.20 | 0.20 | 61  | 40  | 154  | 0.26 | 103.<br>8 | 1.0 | 68.0  | 1.1 |
| Ther | <i>Struthiomimus</i>         | 480 | 142  | 233  | 142  | 535 | 365 | 1380 | 0.27 | 104.<br>3 | 1.0 | 71.1  | 1.2 |
| Ther | <i>Struthiomimus</i>         | 502 | 182  | 258  | 182  | 556 | 398 | 1456 | 0.26 | 99.8      | 0.9 | 71.5  | 1.2 |
| Ther | <i>Syntarus</i>              | 208 | 12.8 | 14.0 | 12.8 | 223 | 132 | 563  | 0.24 | 96.1      | 0.9 | 56.9  | 1.0 |

|      |                      |      |      |      |      |      |     |      |      |           |     |      |     |
|------|----------------------|------|------|------|------|------|-----|------|------|-----------|-----|------|-----|
| Ther | <i>Tarbosaurus</i>   | 1120 | 5423 | 3440 | 3440 | 890  | 530 | 2540 | 0.17 | 60.6      | 0.6 | 36.1 | 0.6 |
| Ther | <i>Tyrannosaurus</i> | 1320 | 6752 | 5400 | 5400 | 1245 | 671 | 3236 | 0.19 | 73.0      | 0.7 | 39.4 | 0.7 |
| Ther | <i>Velociraptor</i>  | 238  | 16.9 | 23.4 | 16.9 | 255  | 99  | 592  | 0.23 | 100.<br>3 | 1.0 | 39.0 | 0.7 |
|      |                      |      |      |      |      |      |     | Avg  | 0.25 | 105.<br>3 |     | 59.2 |     |
