# Supplementary material for: Assessing Arboreal Adaptations of Bird Antecedents: Testing the Ecological Setting of the Origin of the Avian Flight Stroke
Source: PLoS One. 2011 Aug 9;6(8):e22292. doi: 10.1371/journal.pone.0022292 (PMC3153453; doi:10.1371/journal.pone.0022292)
Supplement: Table S12 — Manual phalangeal indices of non-avian theropods and early avians. A) Digit II B) Digit III. (PDF) [file pone.0022292.s025.pdf]

A)

| category | taxon                  | Mcll  | Phll-1 | Phll-2 | Ph total | P.I. | Ref                |
|----------|------------------------|-------|--------|--------|----------|------|--------------------|
| BB       | <i>Archaeopteryx</i>   | 28.0  | 15.4   | 19.4   | 34.8     | 1.24 | [35]               |
| BB       | <i>Archaeopteryx</i>   | 17.8  | 10.1   | 14.5   | 24.6     | 1.38 | [35]               |
| BB       | <i>Archaeopteryx</i>   | 25.0  | 12.5   | 18.5   | 31.0     | 1.24 | [35]               |
| BB       | <i>Archaeopteryx</i>   | 34.3  | 19.0   | 27.0   | 46.0     | 1.34 | [35]               |
| BB       | <i>Archaeopteryx</i>   | 23.5  | 12.8   | 18.6   | 31.4     | 1.34 | [35]               |
| BB       | <i>Dalianraptor</i>    | 23.0  | 22.0   | 19.0   | 41.0     | 1.78 | [28]               |
| BB       | <i>Jeholornis</i>      | 36.7  | 17.8   | 19.2   | 37.0     | 1.01 | [37]               |
| BB       | <i>Jixiangornis</i>    | 44.9  | 22.7   | 21.1   | 43.8     | 0.98 | [38]               |
| BB       | <i>Sapeornis</i>       | 57.1  | 30.0   | 27.7   | 57.7     | 1.01 | [40]               |
| BB       | <i>Sapeornis</i>       | 51.3  | 29.0   | 25.9   | 54.9     | 1.07 | [40]               |
| BB       | <i>Sapeornis</i>       | 52.9  | 30.6   | 26.6   | 57.2     | 1.08 | [40]               |
| BB       | <i>Shenzhouraptor</i>  | 36.7  | 17.8   | 19.2   | 37.0     | 1.01 | [41]               |
| BB       | <i>Sinornis</i>        | 10.7  | 5.4    | 3.8    | 9.2      | 0.86 | [23]               |
| BB       | <i>Yixianornis</i>     | 25.6  | 12.5   | 12.3   | 24.8     | 0.97 | [42]               |
| Ther     | <i>Acrothosaurus</i>   | 116.0 | 101.0  | 103.0  | 204.0    | 1.76 | Pers. com. Currie  |
| Ther     | <i>Albertosaurus</i>   | 83.0  | 41.0   | 58.0   | 99.0     | 1.19 | [43]               |
| Ther     | <i>Allosaurus</i>      | 125.0 | 94.0   | 102.0  | 196.0    | 1.57 | [24]               |
| Ther     | <i>Alxasaurus</i>      | 111.0 | 72.0   | 80.0   | 152.0    | 1.37 | [44]               |
| Ther     | <i>Anchiornis</i>      | 33.9  | 21.0   | 27.0   | 48.0     | 1.42 | [25]               |
| Ther     | <i>Bambiraptor</i>     | 47.8  | 21.4   | 35.0   | 56.4     | 1.18 | [26]               |
| Ther     | <i>Caudipteryx</i>     | 29.0  | 18.5   | 25.0   | 43.5     | 1.5  | [48]               |
| Ther     | <i>Caudipteryx</i>     | 28.0  | 19.0   | 24.0   | 43.0     | 1.54 | [49]               |
| Ther     | <i>Caudipteryx</i>     | 28.0  | 101.0  | 103.0  | 41.0     | 1.46 | [49]               |
| Ther     | <i>Citipati</i>        | 120.0 | -      | -      | 190.0    | 1.58 | Pers. com Balanoff |
| Ther     | <i>Coelurus</i>        | 53.0  | 46.0   | 48.5   | 94.5     | 1.78 | [50]               |
| Ther     | <i>Coleophysis</i>     | 39.2  | 18.6   | 21.0   | 39.6     | 1.01 | [51]               |
| Ther     | <i>Compsognathus</i>   | 17.6  | 7.8    | 14.5   | 22.3     | 1.27 | [27]               |
| Ther     | <i>Compsognathus</i>   | 27.3  | 13.4   | 24.0   | 37.4     | 1.37 | [27]               |
| Ther     | <i>Deinonychus</i>     | 230.0 | 140.0  | 226.0  | 366.0    | 1.59 | [104]              |
| Ther     | <i>Deinonychus</i>     | 88.3  | 54.0   | 76.5   | 130.5    | 1.48 | [52]               |
| Ther     | <i>Deinonychus</i>     | 93.7  | 55.3   | 78.0   | 133.3    | 1.42 | [52]               |
| Ther     | <i>Dilong</i>          | 43.0  | 28.0   | 43.0   | 71.0     | 1.65 | Pers. com. Currie  |
| Ther     | <i>Dilophosaurus</i>   | 105.0 | 70.0   | 63.0   | 133.0    | 1.27 | [54]               |
| Ther     | <i>ek trodon</i>       | 40.0  | 26.0   | 24.0   | 50.0     | 1.25 | [105]              |
| Ther     | <i>Epidendrosaurus</i> | 5.2   | 3.2    | 5.4    | 8.6      | 1.65 | [55]               |
| Ther     | <i>Epidendrosaurus</i> | 5.5   | 3.1    | 5.2    | 8.3      | 1.51 | [55]               |
| Ther     | <i>Erlansaurus</i>     | 116.0 | 40.0   | 45.0   | 85.0     | 0.73 | [106]              |

|      |                         |       |       |       |       |      |                     |
|------|-------------------------|-------|-------|-------|-------|------|---------------------|
| Ther | <i>Falcarius</i>        | 91.0  | 69.0  | 85.0  | 154.0 | 1.69 | [56]                |
| Ther | <i>Falcarius</i>        | 96.0  | 69.0  | 87.0  | 156.0 | 1.63 | [56]                |
| Ther | <i>Gallimimus</i>       | 115.0 | 53.0  | 100.0 | 153.0 | 1.33 | [58]                |
| Ther | <i>Gorgosaurus</i>      | 98.0  | 57.0  | 83.0  | 140.0 | 1.43 | Pers. com Currie    |
| Ther | <i>Hagaryphus</i>       | 122.0 | 95.0  | 99.0  | 194.0 | 1.59 | [107]               |
| Ther | <i>Harpymimus</i>       | 94.0  | 49.0  | 104.0 | 153.0 | 1.63 | [61]                |
| Ther | <i>Herrerasaurus</i>    | 66.0  | 47.0  | 51.0  | 98.0  | 1.48 | [108]               |
| Ther | <i>Huxiagnathus</i>     | 39.2  | 27.4  | 33.4  | 60.8  | 1.55 | Pers. Com Hwang     |
| Ther | <i>Jinfengopteryx</i>   | 21.4  | 15.3  | 21.1  | 36.3  | 1.7  | [65]                |
| Ther | <i>Jurvenator</i>       | 11.5  | 8.0   | 10.0  | 18.0  | 1.57 | [66]                |
| Ther | <i>Khann</i>            | 53.0  | -     | -     | 0.0   | 1.7  | Pers. Com. Balanoff |
| Ther | <i>Limusaurus</i>       | 12.0  | 6.2   | 4.3   | 10.5  | 0.88 | [67]                |
| Ther | <i>Megaraptor</i>       | 170.0 | 108.0 | 104.0 | 212.0 | 1.25 | [109]               |
| Ther | <i>Microraptor</i>      | 31.3  | 13.3  | 16.4  | 29.7  | 0.95 | [31]                |
| Ther | <i>Microraptor</i>      | 22.3  | 11.3  | 11.8  | 23.1  | 1.04 | Pers. com Xu        |
| Ther | <i>Northonychus</i>     | 141.2 | 102.0 | 133.4 | 235.4 | 1.67 | [70]                |
| Ther | <i>Ornithomimus</i>     | 100.0 | 36.0  | 90.0  | 126.0 | 1.26 | [34]                |
| Ther | <i>Raptorex</i>         | 20.0  | 13.0  | 22.0  | 35.0  | 1.75 | [60]                |
| Ther | <i>Sinornithoides</i>   | 33.5  | 18.5  | 28.5  | 47.0  | 1.4  | [32]                |
| Ther | <i>Sinornithomimus</i>  | 54.7  | 19.9  | 59.9  | 79.8  | 1.46 | [33]                |
| Ther | <i>Sinornithosaurus</i> | 63.0  | 32.0  | 35.0  | 67.0  | 1.06 | Pers. com Xu        |
| Ther | <i>Sinosauroptryx</i>   | 10.2  | 4.7   | 6.0   | 10.7  | 1.05 | Pers. com Currie    |
| Ther | <i>Sinosauroptryx</i>   | 17.0  | 7.9   | 8.9   | 16.8  | 0.99 | Pers. com Currie    |
| Ther | <i>Sinosauroptryx</i>   | 21.0  | 13.9  | 18.5  | 32.4  | 1.54 | Pers. com Currie    |
| Ther | <i>Struthiomimus</i>    | 103.0 | 44.0  | 89.0  | 133.0 | 1.29 | [34]                |
| Ther | <i>Syntarus</i>         | 26.0  | 13.0  | 17.0  | 30.0  | 1.15 | [100]               |
| Ther | <i>Tanycolagreus</i>    | 81.0  | 65.0  | 75.0  | 140.0 | 1.73 | [76]                |
| Ther | <i>Tarbosaurus</i>      | 75.0  | 34.0  | 62.0  | 96.0  | 1.28 | Pers. com Currie    |
| Ther | <i>Tianyuraptor</i>     | 57.0  | 32.0  | 42.0  | 74.0  | 1.3  | Pers com. Sullivan  |
| Ther | <i>Tyrannosaurus</i>    | 95.0  | 60.0  | 79.0  | 139.0 | 1.46 | Pers. com Currie    |
| Ther | <i>Velociraptor</i>     | 50.8  | 31.3  | 45.8  | 77.1  | 1.52 | [102]               |
| Ther | <i>Yixianosaurus</i>    | 36.0  | 26.0  | 38.0  | 64.0  | 1.78 | [78]                |

B)

| category | taxon                   | McIII | III-1 | III-2 | III-3 | PI   | 3/(1+2) | Reference         |
|----------|-------------------------|-------|-------|-------|-------|------|---------|-------------------|
| BB       | <i>Archaeopteryx</i>    | 22    | 4.8   | 4.2   | 12.9  | 1    | 1.43    | [35]              |
| BB       | <i>Archaeopteryx</i>    | 24.5  | 6.4   | 4     | 12.3  | 0.93 | 1.18    | [35]              |
| BB       | <i>Archaeopteryx</i>    | X     | 7.9   | 6.1   | 17.5  | X    | 1.25    | [35]              |
| BB       | <i>Archaeopteryx</i>    | 16.5  | 4.8   | 2.2   | 9.5   | 1    | 1.36    | [35]              |
| BB       | <i>Dalianraptor</i>     | 22    | 5     | 12    | 13    | 1.36 | 0.76    | [28]              |
| Ther     | <i>Acrocanthosaurus</i> | 89    | 50    | 42    | 60    | 1.71 | 0.65    | Pers. com. Currie |
| Ther     | <i>Allosaurus</i>       | 105   | 50    | 41    | 52    | 1.36 | 0.57    | [24]              |
| Ther     | <i>Anchiornis</i>       | 30.5  | 8.1   | 7.2   | 14.2  | 0.97 | 0.93    | [25]              |
| Ther     | <i>Bambiraptor</i>      | 44.9  | 15.5  | 6.3   | 23.5  | 1.01 | 1.08    | [26]              |
| Ther     | <i>Coelophysis</i>      | 35.9  | 12.6  | 15.4  | 17.5  | 1.27 | 0.63    | [51]              |
| Ther     | <i>Deinonchus</i>       | 246   | 110   | 104   | 186   | 1.63 | 0.87    | [104]             |
| Ther     | <i>Deinonychus</i>      | 73.4  | 21.7  | 15.5  | 47.3  | 1.15 | 1.27    | [52]              |
| Ther     | <i>Dilophosaurus</i>    | 115   | 41    | 44    | 45    | 1.13 | 0.53    | [54]              |
| Ther     | <i>Elmisaurus</i>       | X     | 30    | 30    | 43    | X    | 0.72    | [110]             |
| Ther     | <i>Epidendrosaurus</i>  | 5.75  | 7.1   | 6.5   | 6     | 3.41 | 0.44    | [55]              |
| Ther     | <i>Epidendrosaurus</i>  | X     | 7.3   | 6.8   | 6.3   | X    | 0.45    | [55]              |
| Ther     | <i>Erlanosaurus</i>     | 79    | 14    | 17    | 33    | 0.81 | 1.06    | [106]             |
| Ther     | <i>Falcarius</i>        | 75    | 31    | 30    | 48    | 1.45 | 0.79    | [56]              |
| Ther     | <i>Gallimimus</i>       | 105   | 32    | 36    | 74    | 1.35 | 1.09    | [58]              |
| Ther     | <i>Hagryphus</i>        | 8.7   | 5.4   | 4.5   | 6     | 1.83 | 0.61    | [107]             |
| Ther     | <i>Harpymimus</i>       | 103   | 31    | 37    | 81    | 1.45 | 1.19    | [61]              |
| Ther     | <i>Herrersaurus</i>     | 74    | 44    | 35    | 40    | 1.61 | 0.51    | [108]             |
| Ther     | <i>Juravenator</i>      | 9     | 4     | 4.5   | 5.5   | 1.56 | 0.65    | [66]              |
| Ther     | <i>Linheraptor</i>      | 52    | 25    | 12    | 36    | 1.4  | 0.97    | [111]             |
| Ther     | <i>Microraptor</i>      | 29.8  | 10.12 | 4.1   | 10.37 | 0.83 | 0.73    | [31]              |
| Ther     | <i>Ornithomimus</i>     | 98    | 31    | 23    | 74    | 1.31 | 1.37    | [34]              |
| Ther     | <i>Sinornithodes</i>    | 35    | 4.2   | 8.2   | 20.3  | 0.93 | 1.64    | [32]              |
| Ther     | <i>Sinornithomimus</i>  | 53.8  | 13.9  | 14.6  | 42.9  | 1.33 | 1.51    | [33]              |
| Ther     | <i>Sinornithosaurus</i> | 60    | 18    | 9     | 23    | 0.83 | 0.85    | Pers. com Xu      |
| Ther     | <i>Sinosauroptryx</i>   | 8.3   | 3.4   | 2     | 3     | 1.01 | 0.56    | Pers. com Currie  |
| Ther     | <i>Sinosauroptryx</i>   | 13.8  | 4.7   | 3.6   | 5     | 0.96 | 0.6     | Pers. com Currie  |
| Ther     | <i>Struthiomimus</i>    | 103   | 28    | 28    | 68    | 1.2  | 1.21    | [34]              |
| Ther     | <i>Syntarus</i>         | 26    | 10    | 9     | 12    | 1.19 | 0.63    | [100]             |
| Ther     | <i>Velociraptor</i>     | 45    | 17.6  | 10.1  | 32.2  | 1.33 | 1.16    | [102]             |
| Ther     | <i>Velociraptor</i>     | X     | 19    | 11.1  | 33.2  | X    | 1.1     | [102]             |
| Ther     | <i>Yixianosaurus</i>    | 31    | 9     | 8     | 22    | 1.26 | 1.29    | [78]              |
