# Supplementary material for: Assessing Arboreal Adaptations of Bird Antecedents: Testing the Ecological Setting of the Origin of the Avian Flight Stroke
Source: PLoS One. 2011 Aug 9;6(8):e22292. doi: 10.1371/journal.pone.0022292 (PMC3153453; doi:10.1371/journal.pone.0022292)
Supplement: Text S1 — References cited in all supplementary information. (PDF) [file pone.0022292.s028.pdf]

1. Argot, C (2004) Functional-adaptive analysis of the postcranial skeleton of a Laventan Borhyaenoid, *Lycopsis longirostris* (Marsupialia, Mammalia). *Journal of Vertebrate Paleontology* 24(3): 689-70.
2. Renesto S (1994) *Megalancosaurus*, a possibly Arboreal Archosauromorph (Reptilia) from the Upper Triassic of Northern Italy. *Journal of Vertebrate Paleontology* 14: 38-52.
3. Renesto S and Binelli G (2006) *Vallesaurus cenensis* Wild 1991, A drepanosaurid (Reptilia, Diapsida) from the late Triassic of Northern Italy. *Rivista Italiana di Paleontologia e Stratigrafia* 112(1):77-94.
4. Fröbisch J, Reisz RR (2009) The Late Permian herbivore *Suminia* and the early evolution of arboreality in terrestrial vertebrate ecosystems. *Proceedings of The Royal Society B* 276: 3611-8.
5. Hopson JA (2001) Ecomorphology of avian and nonavian theropod phalangeal proportions: Implications for the arboreal versus terrestrial origin of bird flight. In: Gauthier JA, Gall LF, editors. *New Perspectives on the Origin and Early Evolution of Birds: Proceedings of the International Symposium in Honour of John H. Ostrom*. Peabody Museum of Natural History. pp. 211-227.
6. Dyke G J, Nudds R L and Rayner J M V (2006) Limb disparity and wing shape in pterosaurs. *Journal of Evolutionary Biology*. 19(4): 1339-1342.
7. Li Z (2008) Morphological study and functional analysis of *Jeholornis prima*. Msc. Thesis.
8. Norberg UM ( 1979) The Morphology of the wings, legs, and tail of three coniferous forest tits, the goldcrest, and the treecreeper in relation to locomotor pattern and feeding station selection. *Philosophical Transactions of the Royal Society B*. 287 (1019): 131-165.
9. Spring L W (1965) Climbing and pecking adaptations in some North American woodpeckers. *The Condor*. 67(6): 457-488.
10. Moreno E and Carrascal L M (1993) Ecomorphological patterns of aerial feeding in oscines (Passeriformes: Passeri). *Biological Journal of the Linnean Society*. 50: 147-165.
11. Gatsey S M (1991) Hind limb scaling in birds and other theropods: Implications for terrestrial locomotion. *Journal of Morphology*. 209:83-96.
12. Fujita M (2004) Kinematic parameters of the walking of herons, ground-feeders and water-fowl. *Comparative Biochemistry and Physiology Part A*. 139: 117-124.
13. Livezey B C (1993) An ecomorphological review of the dodo (*Raphus cucullatus*) and solitaire (*Pezophaps solitaria*), flightless Columbiformes of the Mascarene Islands. *Journal of Zoology* 230: 247-292

14. Dickison M R (2007) The allometry of giant flightless birds. Ph.D thesis.
15. Ward A B, Weigel P D and Conroy R M (2002) Functional morphology of raptor hindlimbs: Implications for resource portioning. *The Auk*. 119(4): 1052-1063.
16. Li P-peng, Gao K-qin, Hou L-hai, Xu X (2007) A gliding lizard from the Early Cretaceous of China. *Proceedings of the National Academy of Sciences of the United States of America* 104: 5507-5509.
17. Argot C (2003) Functional adaptations of the postcranial skeleton of two Miocene Borhyaenoids (Mammalia, Metatheria), *Borhyaena* and *Prothylacinus*, from South America. *Palaeontology*. 46(6): 1213-1267.
18. Doppes D (2001) *Gulo gulo* (Mustelidae, Mammalia) im Jungpleistozän Mitteleuropas. *Beiträge zur Paläontologie*. 26: 1-95.
19. Steudel K and Beattie J (1993) scaling of cursoriality in mammals. *Journal of Morphology*. 217: 55-63.
20. Day L M and Jayne BC (2007) Interspecific scaling of the morphology and posture of the limbs during the locomotion of cats (Felidae). *The Journal of Experimental Biology*. 210: 642-654.
21. Wellnhofer P (1974) Das fünfte Skelette exemplar von *Archaeopteryx*. *Palaeontographica Abteilung A* .147( 4-6): 168-216.
22. Zhou Z, Clarke J A and Zhang F (2008) Insights into diversity, body size and morphological evolution from the largest Early Cretaceous enantiornithine bird. *Journal of Anatomy*. 212: 565-577.
23. Sereno P C , Rao C and Li J (2002) *Sinornis santensis* (Aves: Enantiornithines) from the Early Cretaceous of Northeastern China. In: Chiappe LM and Witmer L M Editors. *Mesozoic birds: above the heads of dinosaurs*. University of California Press. pp. 184-208.
24. Gilmore C W (1920) Osteology of the carnivorous Dinosauria in the United States national Museum, with special reference to the genera *Antrodemus* (*Allosaurus*) and *Ceratosaurus*. *Bulletin of the United States National Museum* .110: 1-154.
25. Hu D, Hou L, Zhang L, Xu X (2009) A pre-*Archaeopteryx* troodontid theropod from China with long feathers on the metatarsus. *Nature* 461: 640-3
26. Burnham D A 2004) New information on *Bambiraptor feinbergi* (Theropoda: Dromaeosauridae) from the Late Cretaceous of Montana. In: Currie PJ, Koppelhaus MA, Shugar MA, L WJ, editors. *Feathered Dragons. Studies on the Transition from Dinosaurs to Birds*. Indiana University Press. pp. 67-111.

27. Peyer K (2006) A reconsideration of *Compsognathus* from the Upper Tithonian of Canjurs, Southeastern France. *Journal of Vertebrate Paleontology*, 26(4): 879-896.
28. Gao C and Liu J (2005). A new avian taxon from Lower Cretaceous Jiufotang Formation of western Liaoning (In Chinese). *Global Geology*. 24(4):313-316.
29. Zhang F, Zhou Z, Xu X, Wang X (2002) A juvenile coelurosaurian theropod from China indicates arboreal habits. *Naturwissenschaften* 89: 394-398.
30. Xu X and Norell M A (2004) A new troodontid dinosaur from China with avian-like sleeping posture. *Nature*. 431: 838-841.
31. Hwang SH, Norell MA, Qiang JI, Keqin GAO (2002) New Specimens of *Microraptor zhaoianus* (Theropoda: Dromaeosauridae) from Northeastern China. *American Museum Novitates*: 1-44.
32. Russell D A and Dong Z (1993) A nearly complete skeleton of a new troodontid dinosaur from the Early Cretaceous of the Ordos Basin, Inner Mongolia, People's Republic of China. *Canadian Journal of Earth Sciences* 30: 2163-2173.
33. Kobayashi Y. and Lü J (2003) A new ornithomimid dinosaur with gregarious habits from the Late Cretaceous of China. *Acta Palaeontologica Polonica*. 48: 235-259.
34. Russell D A (1972) Ostrich dinosaurs from the Late Cretaceous of Western Canada. *Canadian Journal of Earth Sciences*. 9: 375-402.
35. Mayr G, Pohl B, Hartman S and Peters DS (2007) The tenth skeletal specimen of *Archaeopteryx*. *Zoological Journal of the Linnean Society* 149: 97-116.
36. Chiappe L M, Ji S, Ji Q and Norell M A (1999) Anatomy and systematics of the Confuciusornithidae (Theropoda: Aves) from the Late Mesozoic of Northeastern China. *Bulletin of the American Museum of Natural History*. 242: 1-89.
37. Zhou Z and Zhang F (2002) A long-tailed, seed-eating bird from the Early Cretaceous of China. *Nature*. 418: 405-409
38. Ji Q, Ji S, Zhang H, You H, Zhang J, Wang L Yuan C and Ji X (2002) A new avialan bird —*Jixiangornis orientalis* gen. et sp. nov.—from the Lower Cretaceous of Western Liaoning. *Journal of Nanjing University (Natural Science Edition)*. 38(6): 723-736.
39. Chiappe L M (2002) Osteology of the flightless *Patagopteryx deferrariisi* from the Late Cretaceous of Patagonia (Argentina). In L. M. Chiappe & L. M. Witmer editors. *Mesozoic Birds: Above the heads of dinosaurs*. University of California Press pp. 281-316.
40. Zhou Z and Zhang F (2003) Anatomy of the primitive bird *Sapeornis chaoyangensis* from the Early Cretaceous of Liaoning, China. *Canadian Journal of Earth Sciences* 40: 731-747.

41. Ji Q, Ji S , You H, Zhang J, Yuan C, Ji X, Li J and Li Y (2003) An early Cretaceous Avialian bird , *Shenzhouraptor sinensis* from Western Liaoning, China. *Acta Geologica Sinica*. 77(1): 21-27.
42. Clarke J A, Zhou Z and Zhang F (2006) Insight into the evolution of avian flight from a new clade of Early Cretaceous ornithurines from China and the morphology of *Yixianornis grabaui*. *Journal of anatomy*. 208(3): 287-308.
43. Russell D A (1970) Tyrannosaurs from the Late Cretaceous of Western Canada. *National Museum of Natural Sciences Publications in Paleontology*. 1: 1-34.
44. Russell D A and Dong Z (1993) The affinities of a new theropod from the Alxa Desert, Inner Mongolia, People's Republic of China. *Canadian Journal of Earth Sciences*. 30: 2107-2127.
45. Charig A J and Milner A (1997) *Baryonyx walkeri*, a fish-eating dinosaur from the Wealden of Surrey. *Bulletin of the Natural History Museum of London Geology Series* 53(1): 11-70.
46. Makovicky P J, Apesteguia S and Agnolin F (2005) The earliest dromaeosaurid theropod from South America. *Nature*. 437: 1007-1011.
47. Bonaparte J F, Novas F E and Coria R A (1990) *Carnotaurus sastrei* Bonaparte, the horned, lightly built carnosaur from the ?Albian of Patagonia. *Los Angeles Museum Contributions in Science*. 416: 1-41.
48. Zhou Z and Wang X (2000) A new species of *Caudipteryx* from the Yixian Formation of Liaoning, Northeast China. *Vertebrata Palasiatica*. 38(2): 111-127.
49. Zhou Z, Wang X, Zhang F, Xu X (2000) Important features of *Caudipteryx*-Information from two nearly complete new specimens. *Vertebrata Palasiatica*. 38(4): 241-254.
50. Carpenter K, Miles C and Cloward K (2005) Redescription of the small maniraptoran theropods *Ornitholestes* and *Coelurus* from the Upper Jurassic Morrison Formation of Wyoming. In K. Carpenter Editor. *The Carnivorous Dinosaurs*. Indiana University Press. pp. 49-71.
51. Colbert E H (1989) The Triassic dinosaur *Coelophysis*. *Bulletin of the Museum of Northern Arizona*. 57: 1-174.
52. Ostrom J H ( 1969) Osteology of *Deinonychus antirrhopus*, an unusual theropod from the Lower Cretaceous of Montana. *Peabody Museum of Natural History, Bulletin*, 30: 1-165.
53. Novas F E, Pol D, Canale JI, Porfiri J D and Calvo J O (2009) A bizarre Cretaceous theropod dinosaur from Patagonia and the evolution of Gondwanan dromaeosaurids. *Proceedings of The Royal Society B*, 276, 1101-1107.

54. Welles S (1984) *Dilophosaurus wetherilli* (Dinosauria, Theropoda). Osteology and comparisons. *Palaeontographica Abteilung A*. 185: 85-180.
55. Zhang F, Zhou Z, Xu X, Wang X, Sullivan C (2008) A bizarre Jurassic maniraptoran from China with elongate ribbon-like feathers. *Nature* 455: 1105-1108.
56. Zanno L E (2006) The pectoral girdle and forelimb of the primitive therizinosauroid *Falcarius utahensis* (Theropoda, Maniraptora): Analyzing evolutionary trends within Therizinosauridae. *Journal of Vertebrate Paleontology*. 26(3): 636-650.
57. Azuma Y and Currie P J (2000) A new carnosaur (Dinosauria: Theropoda) from the Lower Cretaceous of Japan. *Canadian Journal of Earth Sciences*. 37: 1735-1753.
58. Osmolska H, Roniewicz E and Barsbold R (1972) A new dinosaur, *Gallimimus bullatus* n. gen., n. sp. (Ornithomimidae) from the Upper Cretaceous of Mongolia. *Acta Palaeontologica Polonica*. 27: 103-143.
59. Xu X and Wang X (2004) A New Dromaeosaur (Dinosauria: Theropoda) from the Early Cretaceous Yixian Formation of Western Liaoning. *Vertebrata Palasiatica*. 42(2):111-119.
60. Sereno P C, Tan L, Brusatte, S L, Kriegstein, H J, Zhao X and Cloward K (2009) Tyrannosaurid skeletal design first evolved at small body size. *Science*. 326: 418-22.
61. Kobayashi Y and Barsbold R (2005). Anatomy of *Harpymimus okladnikovi* Barsbold and Perle 1984 (Dinosauria: Theropoda) of Mongolia. In K. Carpenter The Carnivorous Dinosaurs. Indiana University Press, pp. 97-126.
62. Novas F E (1994) New information on the systematics and postcranial skeleton of *Herrerasaurus ischigualastensis* (Theropoda: Herrerasauridae) from the Ischigualasto Formation (Upper Triassic) of Argentina. *Journal of Vertebrate Paleontology*. 13(4): 400-423.
63. Lu J (2004) Oviraptorid dinosaurs from Southern China. Ph.D Thesis: 1-265.
64. Hwang S, Norell M A, Ji Q and Gao K (2004) A large compsognathid from the Early Cretaceous Yixian Formation of China. *Journal of Systematic Palaeontology*. 2(1):13-30.
65. Ji Q, Ji S, Lu J, You H, Chien W Liu and Liu Y (2005) First avialian bird from China. *Geological Bulletin of China*. 24(3), 197-210.
66. Chiappe LM and GÜhlich U B (2011) Anatomy of *Juravenator starki* (Theropoda: Coelurosauria) from the Late Jurassic of Germany. *Neues Jahrbuch für Geologie und Paläontologie – Abhandlungen*. 258: 277-296.
67. Xu, X, Clark J M, Mo J, Choiniere J, Forster C A, Erickson G M, Hone D W E, Corwin S, Eberth D, Nesbitt S, Zhao Q, Hernandez R, Jia C, Han F, Guo Y (2009). A Jurassic ceratosaur from China helps clarify avian digital homologies. *Nature*. 459: 940-944.

68. Turner A H, Pol D, Clarke J A, Erickson G A and Norell M A (2007) A basal dromaeosaurid and size evolution preceding avian flight. *Science*. 317: 1378-81.
69. Perle A, Chiappe L M, Barsbold R, Clarke J M and Norell M A (1994) Skeletal morphology of *Mononykus olecranus* (Theropoda: Avialae) from the Late Cretaceous of Mongolia. *American Museum Novitates*. 3105: 1-29.
70. Zanno L E, Gillette D D, Albright L B and Titus A L (2009) A new North American therizinosaurid and the role of herbivory in 'predatory' dinosaur evolution. *Proceedings of the Royal Society B*. 1672: 3505-3511.
71. Smith D (1992) The type specimen of *Oviraptor philoceratops*, a theropod dinosaur from the Upper Cretaceous of Mongolia. *Neues Jahrbuch für Geologie und Paläontologie, Abhandlungen*. 186: 365-388.
72. Allain R and Chure D J (2002) *Poekilopleuron bucklandii*, the theropod dinosaur from the Middle Jurassic (Bathonian) of Normandy. *Palaeontology*. 45(6):1107-1121.
73. Ji Q, Currie P J, Norell M A and Ji S (1998) Two feathered dinosaurs from Northeastern China. *Nature*. 393: 753-761.
74. Perle S (1979) Segnosauridae-A new family of Theropoda from the Lower Cretaceous of Mongolia ( In Russian). *Transactions(Sestnaya Sovetsko-Mongol'skaya eskpeditcia, Trudy)* 45-55.
75. Gao Y (1998) A new species of Middle Jurassic Carnosauria from Dashanpu, Zigong, Sichuan Province, *Szechuanosaurus zigongensis* sp. nov. *Vertebrata Palasiatica*, 31(4): 308-314.
76. Carpenter K, Miles C and Cloward K (2005) New small theropod from the Upper Jurassic Morrison Formation of Wyoming. In K. Carpenter *The Carnivorous Dinosaurs*. Indiana University Press, pp. 23-48.
77. Britt B (1991) Theropods of Dry Mesa Quarry (Morrison Formation, Late Jurassic), Colorado, with emphasis on the osteology of *Torvosaurus tanneri*. *Brigham Young University, Geological Studies*. 1-72.
78. Xu X and Wang X (2003) A new maniraptoran from the Early Cretaceous Yixian Formation of western Liaoning. *Vertebrata Palasiatica*. 41(3): 195-202.
79. Chiappe L M, Ji S and Ji Q (2007) Juvenile Birds from the Early Cretaceous of China: Implications for Enantiornithine Ontogeny. *American Museum Novitates*. 3594(1): 1-46.
80. Zhou Z, Clarke J, and Zhang, F (2002) *Archeoraptor's* better half. *Nature*. 420:285.
81. Sereno P C, Wilson J A, Larsson H C E, Dutheil D B and Sues H D (1994) Early Cretaceous dinosaurs from the Sahara. *Science*. 266: 267-271.

82. Hocknull S A, White M A, Tischler T R, Cook A G, Calleja N D, Sloan T and Elliott D (2009) New Mid-Cretaceous (Latest Albian) Dinosaurs from Winton, Queensland, Australia. PloS one, 4(7), e6190.
83. Xu X, Tang Z and Wang X L (1999) A therizinosauroid dinosaur with integumentary structures from China. Nature. 399: 350-354.
84. Madsen J H and Welles S (2000) *Ceratosaurus* (Dinosauria, Theropoda) a revised osteology. Miscellaneous Publications of the Utah Geological Survey. 2: 1-80.
85. Benson R B and Xu X (2008) The anatomy and systematic position of the theropod dinosaur *Chilantosaurus tashuikouensis* Hu, 1964 from the Early Cretaceous of Alanshan, People's Republic of China. Geological Magazine. 145(6): 778-789.
86. Sereno P C, Dutheil D B, Iarochene M, Larsson H C E, Lyon G H, Magwene P M, Sidor C A, Varricchio D J and Wilson J A (1996) Predatory dinosaurs from the Sahara and Late Cretaceous faunal differentiation. Science. 272: 986-991.
87. Holtz T R (1995) The Arctometatarsalian pes, an unusual structure of the metatarsus of Cretaceous theropods (Dinosauria: Saurischia). Journal of Vertebrate Paleontology. 14(4): 480-519.
88. Sadleir R, Barret P M. and Powell H P (2008) The anatomy and systematics of *Eustreptospondylus oxoniensis*. A theropod dinosaur from the Middle Jurassic of Oxfordshire, England, London: The Paleontographical Society.
89. Kobayashi Y and Barsbold R (2005) Re-examination of a primitive ornithomimosaur, *Garudimimus brevipes* Barsbold, 1981 (Dinosauria: Theropoda), from the Late Cretaceous of Mongolia. Canadian Journal of Earth Sciences. 42: 1501-1521.
90. Xu X, Tan Q, Wang J, Zhao X and Tan L (2007) A gigantic bird-like dinosaur from the Late Cretaceous of China. Nature, 447: 844-847.
91. Zhang X, Xu X, Zhao X, Sereno P C, Kuang X and Tan L (2001) A long-necked Therizinosauroid dinosaur from the Upper Cretaceous Iren Dabasu Formation of Nei Mongol, People's Republic of China. Vertebrata Palasiatica. 39(4): 282-290.
92. Brusatte S L, Benson R B and Hutt S (2008) The osteology of *Neovenator salerii* (Dinosauria: Theropoda) from the Wealden Group (Barremian ) of the Isle of Wight, London: Palaeontographical Society. 1-75.
93. de Kirk W J, Forster C A, Sampson S, Chinsamy A, Ross C F (2000) A new coelurosaurian dinosaur from the Early Cretaceous of South Africa. Journal of Vertebrate Paleontology. 20(2):324-332.
94. Karhu A A and Rautian A (1996) A new family of Maniraptora (Dinosauria: Saurischia) from the Late Cretaceous of Mongolia. Paleontological Journal. 30(5):583-592.

95. Ostrom J H (1981) *Procompsognathus*: Theropod or thecodont. *Palaeontographica A*, 179: 179-195.
96. Forster C A , Sampson, S, Chiappe L M and Krause D W (1998) The theropod ancestry of birds: New evidence from the Late Cretaceous of Madagascar. *Science* 279:1915-1919.
97. Farina R A and Christiansen P (2004) Mass Prediction in theropod dinosaurs. *Historical Biology*. 16(2); 85-92.
98. Tao H E, Wang X L and Zhou Z H (2008) A new genus and species of Caudipterid dinosaurs from the Lower Cretaceous Jiufotang Formation of Western Liaoning, China. *Vertebrata Palasiatica*. 46(3): 178-189.
99. Currie P and Zhao X (1993) A carnosaur (Dinosauria, Theropoda) from the Jurassic of Xinjiang, People's Republic of China. *Canadian Journal of Earth Sciences*. 30: 2037-2081.
100. Raath M A (1969) A new coelurosaurian dinosaur from the Forest Sandstone of Rhodesia. *Arnoldia*. 28(4): 1-25.
101. Rauhut O W and Xu X (2005) The small theropod dinosaurs *Tugulusaurus* and *Phaedrolosaurus* from the Early Cretaceous of Xinjiang, China. *Journal of Vertebrate Paleontology*. 25(1): 107-118.
102. Norell M A and Makovicky P J (1999) Important features of the Dromaeosaurid Skeleton II: Information from newly collected specimens of *Velociraptor mongoliensis*. *American Museum Novitates*. 3282: 1-45.
103. Dong Z, Zhou S and Zhang Y (1983) Dinosaurs from the Jurassic of Sichuan. *Palaeontologica Sinica Series C*. 162(23): 1-136.
104. Osmolska H and Roniewicz E (1970) Deinoceridae, a new family of theropod dinosaurs. *Acta Paleontologica Polonica*. 21: 5-19.
105. Barsbold R, Osmolska H and Kurzanov S M (1987) On a new troodontid (Dinosauria, Theropoda) from the Early Cretaceous of Mongolia. *Acta Palaeontologica Polonica*. 32(1-2): 121-132.
106. Xu X, Zhang X, Sereno P C, Zhao X, Kuan X, Han J and Tan L (2002) A new Therizinosauroid (Dinosauria, Theropoda) from the Upper Cretaceous Iren Dabasu Formation of Nei Mongol. *Vertebrata Palasiatica*. 40(3): 228-240.
107. Zanno L E and Sampson S D (2005) A new oviraptorosaur (Theropoda, Maniraptora) from the Late Cretaceous (Campanian) of Utah. *Journal of Vertebrate Paleontology*. 25(4): 897-904.

108. Sereno P C (1994) The Pectoral Girdle and Forelimb of the Basal Theropod *Herrerasaurus Ischigualastensis*. *Journal of Vertebrate Paleontology*. 13(4): 425-450.
109. Calvo J O, Porfiri J D, Veralli C, Novas F and Poblete F (2004) Phylogenetic status of *Megaraptor namunhuaiquii* Novas based on a new specimen from Neuquén, Patagonia, Argentina. *Ameghiniana*. 41: 565-575.
110. Osmolska H (1981) Co-ossified tarsometatarsi in theropod dinosaurs and their bearing on the problem of bird origins. *Acta Palaeontologia Polonica*. 42: 79-95.
111. Xu X, Choiniere J N, Pittman M, Tan Q, Xiao D, Li Z, Tan L, Clark J M, Norell M A, Hone D W E and Sullivan C (2010) A new dromaeosaurid (Dinosauria: Theropoda) from the Upper Cretaceous Wulansuhai Formation of Inner Mongolia, China. *Zootaxa* 2403: 1-9.
112. Sternberg C M (1932) Two new theropod dinosaurs from the Belly River Formation of Alberta. *Canadian Field Naturalist*. 46(5): 99-105.
